# Supplementary material for: 注射法(皮内注射,皮下注射,筋肉内注射,静脈内注射) (特集 研修医のための小児診療手技の基本) -- (注射法,ワクチンの接種法)
Source: eLife journal article supplement (doi:10.7554/elife.53072), 2010-05-01
Supplement: supp [file elife-53072-supp-v1.zip]

Archive with 28 entries (28 files):
- elife_poa_e53072_Transparent_Reporting_File.pdf
- elife_poa_e53072_Figure_3_figure_supplement_2_source_data_1.xlsx
- elife_poa_e53072_Figure_5_figure_supplement_1.tif
- elife_poa_e53072_Figure_4_figure_supplement_5.tif
- elife_poa_e53072_Figure_6_figure_supplement_1.tif
- elife_poa_e53072_Figure_3_figure_supplement_3.tif
- elife_poa_e53072_Figure_5_figure_supplement_4.tif
- elife_poa_e53072_Figure_5_figure_supplement_5.jpg
- elife_poa_e53072_Figure_1_figure_supplement_1.tif
- elife_poa_e53072_Figure_6_figure_supplement_2.tif
- elife_poa_e53072_Figure_1_figure_supplement_3_source_data_1.xlsx
- elife_poa_e53072_Figure_4_figure_supplement_4.tif
- elife_poa_e53072_Figure_3_figure_supplement_4.jpg
- elife_poa_e53072_Figure_4_figure_supplement_6.tif
- elife_poa_e53072_Figure_5_figure_supplement_3.tif
- elife_poa_e53072_Figure_1_figure_supplement_2.tif
- elife_poa_e53072_Figure_4_figure_supplement_3.tif
- elife_poa_e53072_Figure_5_figure_supplement_6.tif
- elife_poa_e53072_Figure_3_figure_supplement_2.jpg
- elife_poa_e53072_Figure_1_figure_supplement_3.tif
- elife_poa_e53072_Figure_4_figure_supplement_2.tif
- elife_poa_e53072_Figure_3_figure_supplement_1.jpg
- elife_poa_e53072_Figure_3_figure_supplement_3_source_data_1.xlsx
- elife_poa_e53072_Figure_5_figure_supplement_1_source_data_1.xlsx
- elife_poa_e53072_Figure_5_figure_supplement_6_source_data_1.xlsx
- elife_poa_e53072_Figure_5_figure_supplement_5_source_data_1.xlsx
- elife_poa_e53072_Figure_5_figure_supplement_2.tif
- elife_poa_e53072_Figure_4_figure_supplement_1.tif
