# Supplementary material for: 注射法(皮内注射,皮下注射,筋肉内注射,静脈内注射) (特集 研修医のための小児診療手技の基本) -- (注射法,ワクチンの接種法)
Source: eLife journal article supplement (doi:10.7554/elife.53072), 2010-05-01
Supplement: supp [file elife-53072-supp-v1.zip › elife_poa_e53072_Figure_1_figure_supplement_3_source_data_1.xlsx]

## Sheet: Sheet1
	Cd34/Gapdh
	CD45-/CD31-		CD45-/CD31+/CD34-low		CD45-/CD31+/CD34-high
*Average across three technical replicates	Mean	SD	Mean	SD	Mean	SD
	1.46546	0.292492	0.869157	0.200895	4.27363	0.548509
	2.28706	0.431198	1.77766	0.342394	7.03026	1.03141
	1.74061	0.151701	0.962187	0.317413	1.94976	0.319484
	3.08974	1.06947	0.390991	0.0628885	5.48317	0.378803
	Car4/Gapdh
	CD45-/CD31-		CD45-/CD31+/CD34-low		CD45-/CD31+/CD34-high
	Mean	SD	Mean	SD	Mean	SD
	0.00955523	0.0165501	1.58388	0.542032	5.43345	0.51751
	0.0740768	0.0665566	1.49531	0.531528	7.24844	0.141125
	0.0394174	0.0377095	0.636803	0.278228	2.47831	0.145945
	0.0313817	0.0283938	0.284007	0.103769	6.53154	1.23149
	Cd31/Gapdh
	CD45-/CD31-		CD45-/CD31+/CD34-low		CD45-/CD31+/CD34-high
	Mean	SD	Mean	SD	Mean	SD
	0.00872912	0.00325696	1.23518	0.299988	1.26843	0.0709331
	0.0387839	0.0239001	1.78125	0.0209735	2.09531	0.0960944
	0.0249491	0.00592637	0.622259	0.0715261	0.810497	0.125068
	0.037786	0.0420658	0.361313	0.0988253	1.47002	0.107415
	Plvap/Gapdh
	CD45-/CD31-		CD45-/CD31+/CD34-low		CD45-/CD31+/CD34-high
	Mean	SD	Mean	SD	Mean	SD
	0.0221102	0.00878721	1.59297	0.383118	0.598534	0.0722006
	0.0364955	0.0249548	1.39516	0.0339139	0.859258	0.0691913
	0.0124175	0.0013496	0.715373	0.13	0.470547	0.0818491
	0.027058	0.00504897	0.296493	0.0305846	0.821223	0.0900596
	Vwf/Gapdh
	CD45-/CD31-		CD45-/CD31+/CD34-low		CD45-/CD31+/CD34-high
	Mean	SD	Mean	SD	Mean	SD
	0.028443	0.0247573	0.786696	0.327992	0.267729	0.0867528
	0	0	1.81293	0.734374	0.941587	0.0633768
	0	0	0.989901	0.299379	0.297886	0.0753332
	0	0	0.410469	0.10793	0.442754	0.30877
	Ednrb/Gapdh
	CD45-/CD31-		CD45-/CD31+/CD34-low		CD45-/CD31+/CD34-high
	Mean	SD	Mean	SD	Mean	SD
	0.466616	0.05026	1.28268	0.342515	6.92578	0.284648
	0.596596	0.21176	2.10988	0.0637444	8.09072	0.243953
	0.572035	0.0680725	0.310355	0.089027	3.84874	0.449091
	0.400233	0.192225	0.297082	0.130889	6.06418	1.63714
	Gpihbp1/Gapdh
	CD45-/CD31-		CD45-/CD31+/CD34-low		CD45-/CD31+/CD34-high
	Mean	SD	Mean	SD	Mean	SD
	0.0196385	0.00958469	1.52858	0.0894116	0.814787	0.118401
	0.0287659	0.0112095	1.27434	0.215058	0.89654	0.0808331
	0.0404082	0.00692399	0.810022	0.140861	0.581277	0.0860701
	0.0523331	0.0140894	0.387055	0.0591504	0.748901	0.141478
	Kdr/Gapdh
	CD45-/CD31-		CD45-/CD31+/CD34-low		CD45-/CD31+/CD34-high
	Mean	SD	Mean	SD	Mean	SD
	0.0349449	0.0605264	1.26038	0.289967	2.48337	0.269162
	0.0770724	0.0405368	1.77548	0.565748	6.61514	2.21528
	0.0477978	0.0443927	0.673793	0.169137	1.64995	0.402642
	0.050732	0.0586894	0.290354	0.184658	3.56239	0.577399
