# Supplementary material for: 注射法(皮内注射,皮下注射,筋肉内注射,静脈内注射) (特集 研修医のための小児診療手技の基本) -- (注射法,ワクチンの接種法)
Source: eLife journal article supplement (doi:10.7554/elife.53072), 2010-05-01
Supplement: supp [file elife-53072-supp-v1.zip › elife_poa_e53072_Figure_3_figure_supplement_2_source_data_1.xlsx]

## Sheet: Sheet1
#Car4+/Pecam1+ cells per 20x field
	Zones 1/2	Zone 3	Zone 4	Control
	62	65	32	32
	66	55	25	32
	56	67	33	23
	86	60	18	43
	47	54	15	46
	43	71	36	37
	47	56	32	36
	50	87	41	45
	61	45	32
	45	62	26
	48	72	43
	66	60
		94
		95
		95
		68
		140
		33
		52
