# Supplementary material for: 注射法(皮内注射,皮下注射,筋肉内注射,静脈内注射) (特集 研修医のための小児診療手技の基本) -- (注射法,ワクチンの接種法)
Source: eLife journal article supplement (doi:10.7554/elife.53072), 2010-05-01
Supplement: supp [file elife-53072-supp-v1.zip › elife_poa_e53072_Figure_3_figure_supplement_3_source_data_1.xlsx]

## Sheet: Sheet1
% Car4-high EC within 3 microns
	Hopx	Sftpc
	14.7	12.5
	12.2	13
		15.6
	9.4	8.6
	9.5	16
	26.1
	25	9.1
	3.8	6.9
	2.9	10.7
	23.3	12
