# Supplementary material for: 注射法(皮内注射,皮下注射,筋肉内注射,静脈内注射) (特集 研修医のための小児診療手技の基本) -- (注射法,ワクチンの接種法)
Source: eLife journal article supplement (doi:10.7554/elife.53072), 2010-05-01
Supplement: supp [file elife-53072-supp-v1.zip › elife_poa_e53072_Figure_5_figure_supplement_1_source_data_1.xlsx]

## Sheet: Sheet1
	%pHH3+/total nuclei			%pHH3+/total Car4+/Pecam1+ nuclei				%pHH3+/total Pecam1+ nuclei				%pHH3+/total nuclei
	Ctrl	H1N1		Ctrl	H1N1			Ctrl	H1N1			Car4-high ECs	total ECs
	0.06	0.65		0	1.56			0.06	1.17			1.2	0.86
	0	0.52		0	0.44			0	0.5			1.43	0.77
	0	0.62		0	1.88			0	0.8			0.41	0.33
		0.235			0.57				0.13			3.57	2.04
		0.75			1.2				0.86			1.56	1.17
		0.815			1.43				0.77			0.44	0.5
		0.42
		0.3			0.41				0.33			1.88	0.8
		1.155			3.57				2.04			0.57	0.13
	%pHH3+/total nuclei			%Ki67+/total nuclei				%pHH3+/total Car4+/Pecam1+ nuclei				%pHH3+/total Pecam1+ nuclei
	No EdU	EdU		No EdU	EdU			No EdU	EdU			No EdU	EdU
	0.75	0.65		2.3	5.12			1.2	1.56			0.86	1.17
	0.815	0.52		6.87	6.12			1.43	0.44			0.77	0.5
	0.42	0.62		1.63	1.63				1.88				0.8
	0.3	0.235		0.63	1.67			0.41	0.57			0.33	0.13
	1.155			1.55				3.57				2.04
