# Supplementary material for: 注射法(皮内注射,皮下注射,筋肉内注射,静脈内注射) (特集 研修医のための小児診療手技の基本) -- (注射法,ワクチンの接種法)
Source: eLife journal article supplement (doi:10.7554/elife.53072), 2010-05-01
Supplement: supp [file elife-53072-supp-v1.zip › elife_poa_e53072_Figure_5_figure_supplement_5_source_data_1.xlsx]

## Sheet: Sheet1
#Top2a+/Prc1+/Pecam1+ cells per field
Control	Zones 1/2	Zone 3
2	71	48
2	45	52
1	53	20
0	66	42
	61	39
	49	37
	35	23
	17	17
	49	24
	40	27
		42
#Top2a+/Prc1+/Pecam1- cells per field
Control	Zones 1/2	Zone 3
3	29	24
2	23	12
1	27	16
1	15	30
	14	18
	19	11
	24	19
	9	15
	12	17
	28	16
		26
