# Supplementary material for: 注射法(皮内注射,皮下注射,筋肉内注射,静脈内注射) (特集 研修医のための小児診療手技の基本) -- (注射法,ワクチンの接種法)
Source: eLife journal article supplement (doi:10.7554/elife.53072), 2010-05-01
Supplement: supp [file elife-53072-supp-v1.zip › elife_poa_e53072_Figure_5_figure_supplement_6_source_data_1.xlsx]

## Sheet: Sheet1
Cell cycle gene expression in all cell types at homeostasis
	G1	G2/M	S
Epithelial	43	37.3	19.8
Mesenchymal	47.2	25.3	27.5
Endothelial	25.1	35	39.9
Other	40.5	35.4	24.1
Cell cycle gene expression in ECs at homeostasis
	G1	G2/M	S
maEC	31.5	37.3	31.2
Car4-low miEC	22.3	35.9	41.8
Car4-high miEC	39	27.4	33.6
Other EC	19.4	39.8	40.8
Cell cycle gene expression in all cell types 14 days post-flu
	G1	G2/M	S
Epithelial	69.4	8.4	22.1
Mesenchymal	69.1	5.3	25.5
Endothelial	42.2	16.6	41.1
Other	64.2	9.8	26.1
Cell cycle gene expression in ECs 14 days post-flu
	G1	G2/M	S
maEC	46.4	12.5	41.1
Car4-low miEC	40.3	16.2	43.5
Car4-high miEC	52.6	10.2	37.1
Other EC	43.6	14.1	42.3
Proliferating EC	0	89.8	10.2
