# Supplementary figures and images for: 注射法(皮内注射,皮下注射,筋肉内注射,静脈内注射) (特集 研修医のための小児診療手技の基本) -- (注射法,ワクチンの接種法)
Source: eLife journal article supplement (doi:10.7554/elife.53072), 2010-05-01

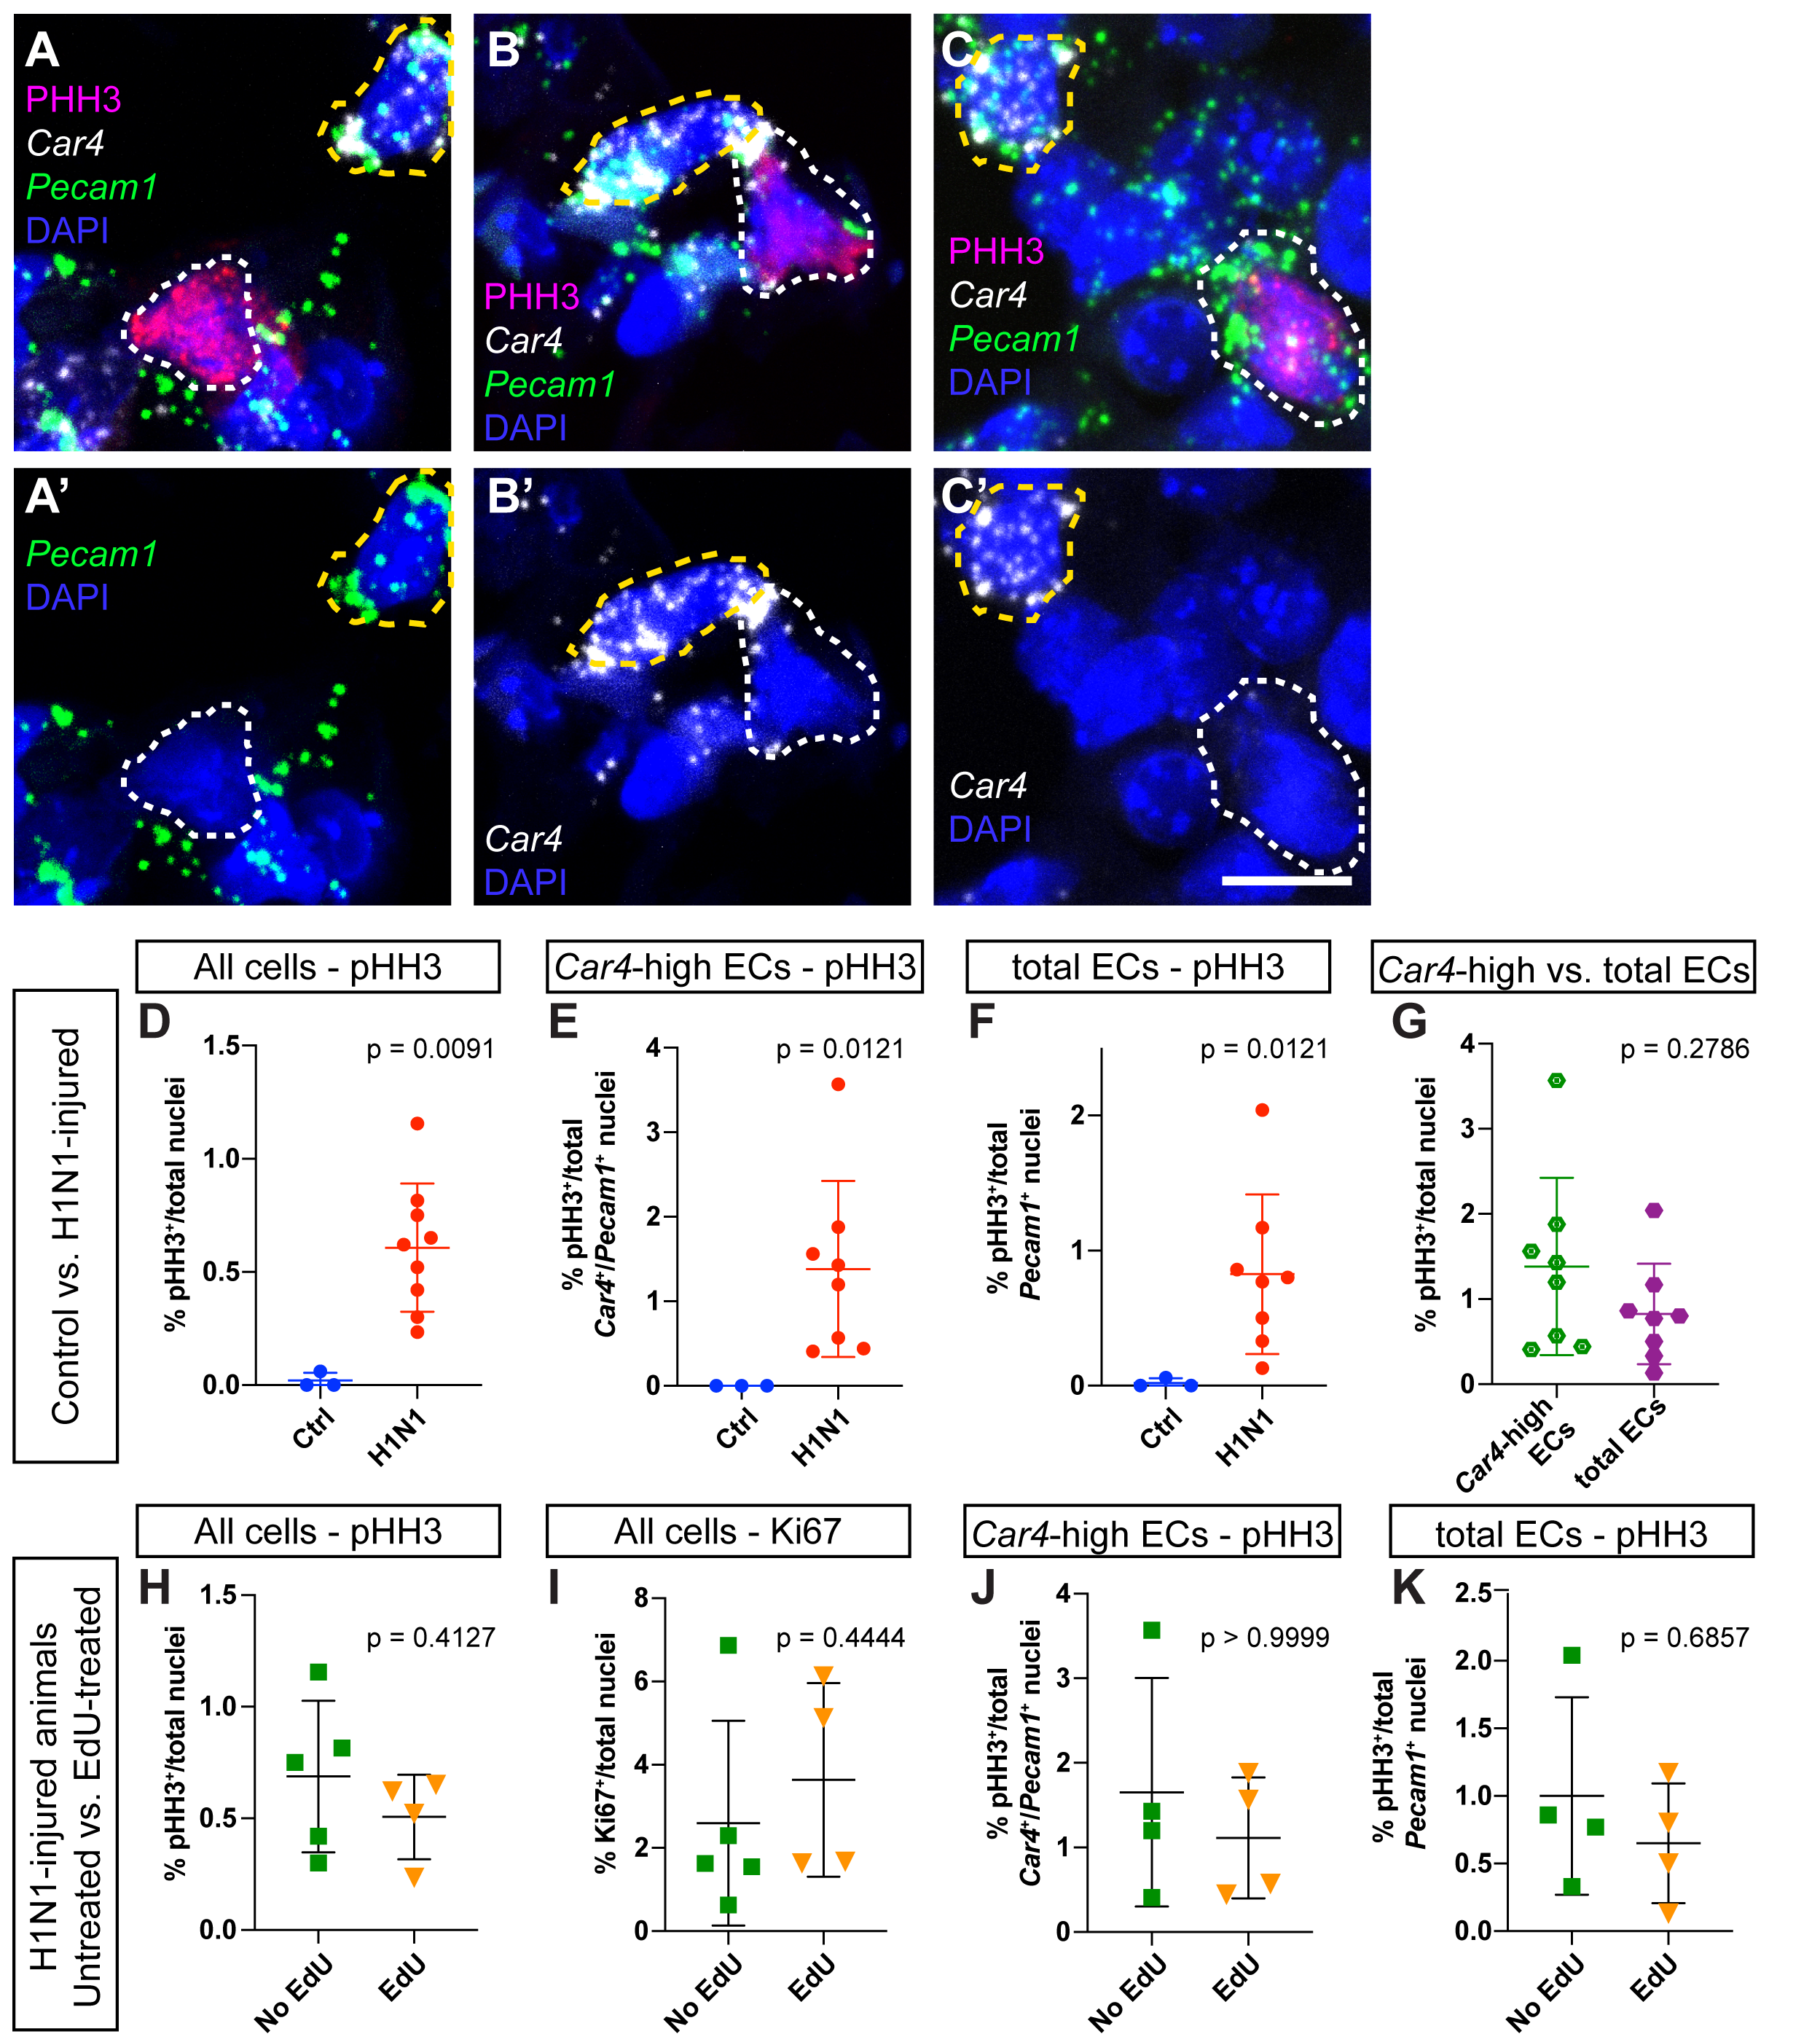

Supplement: supp [file elife-53072-supp-v1.zip › elife_poa_e53072_Figure_5_figure_supplement_1.tif]

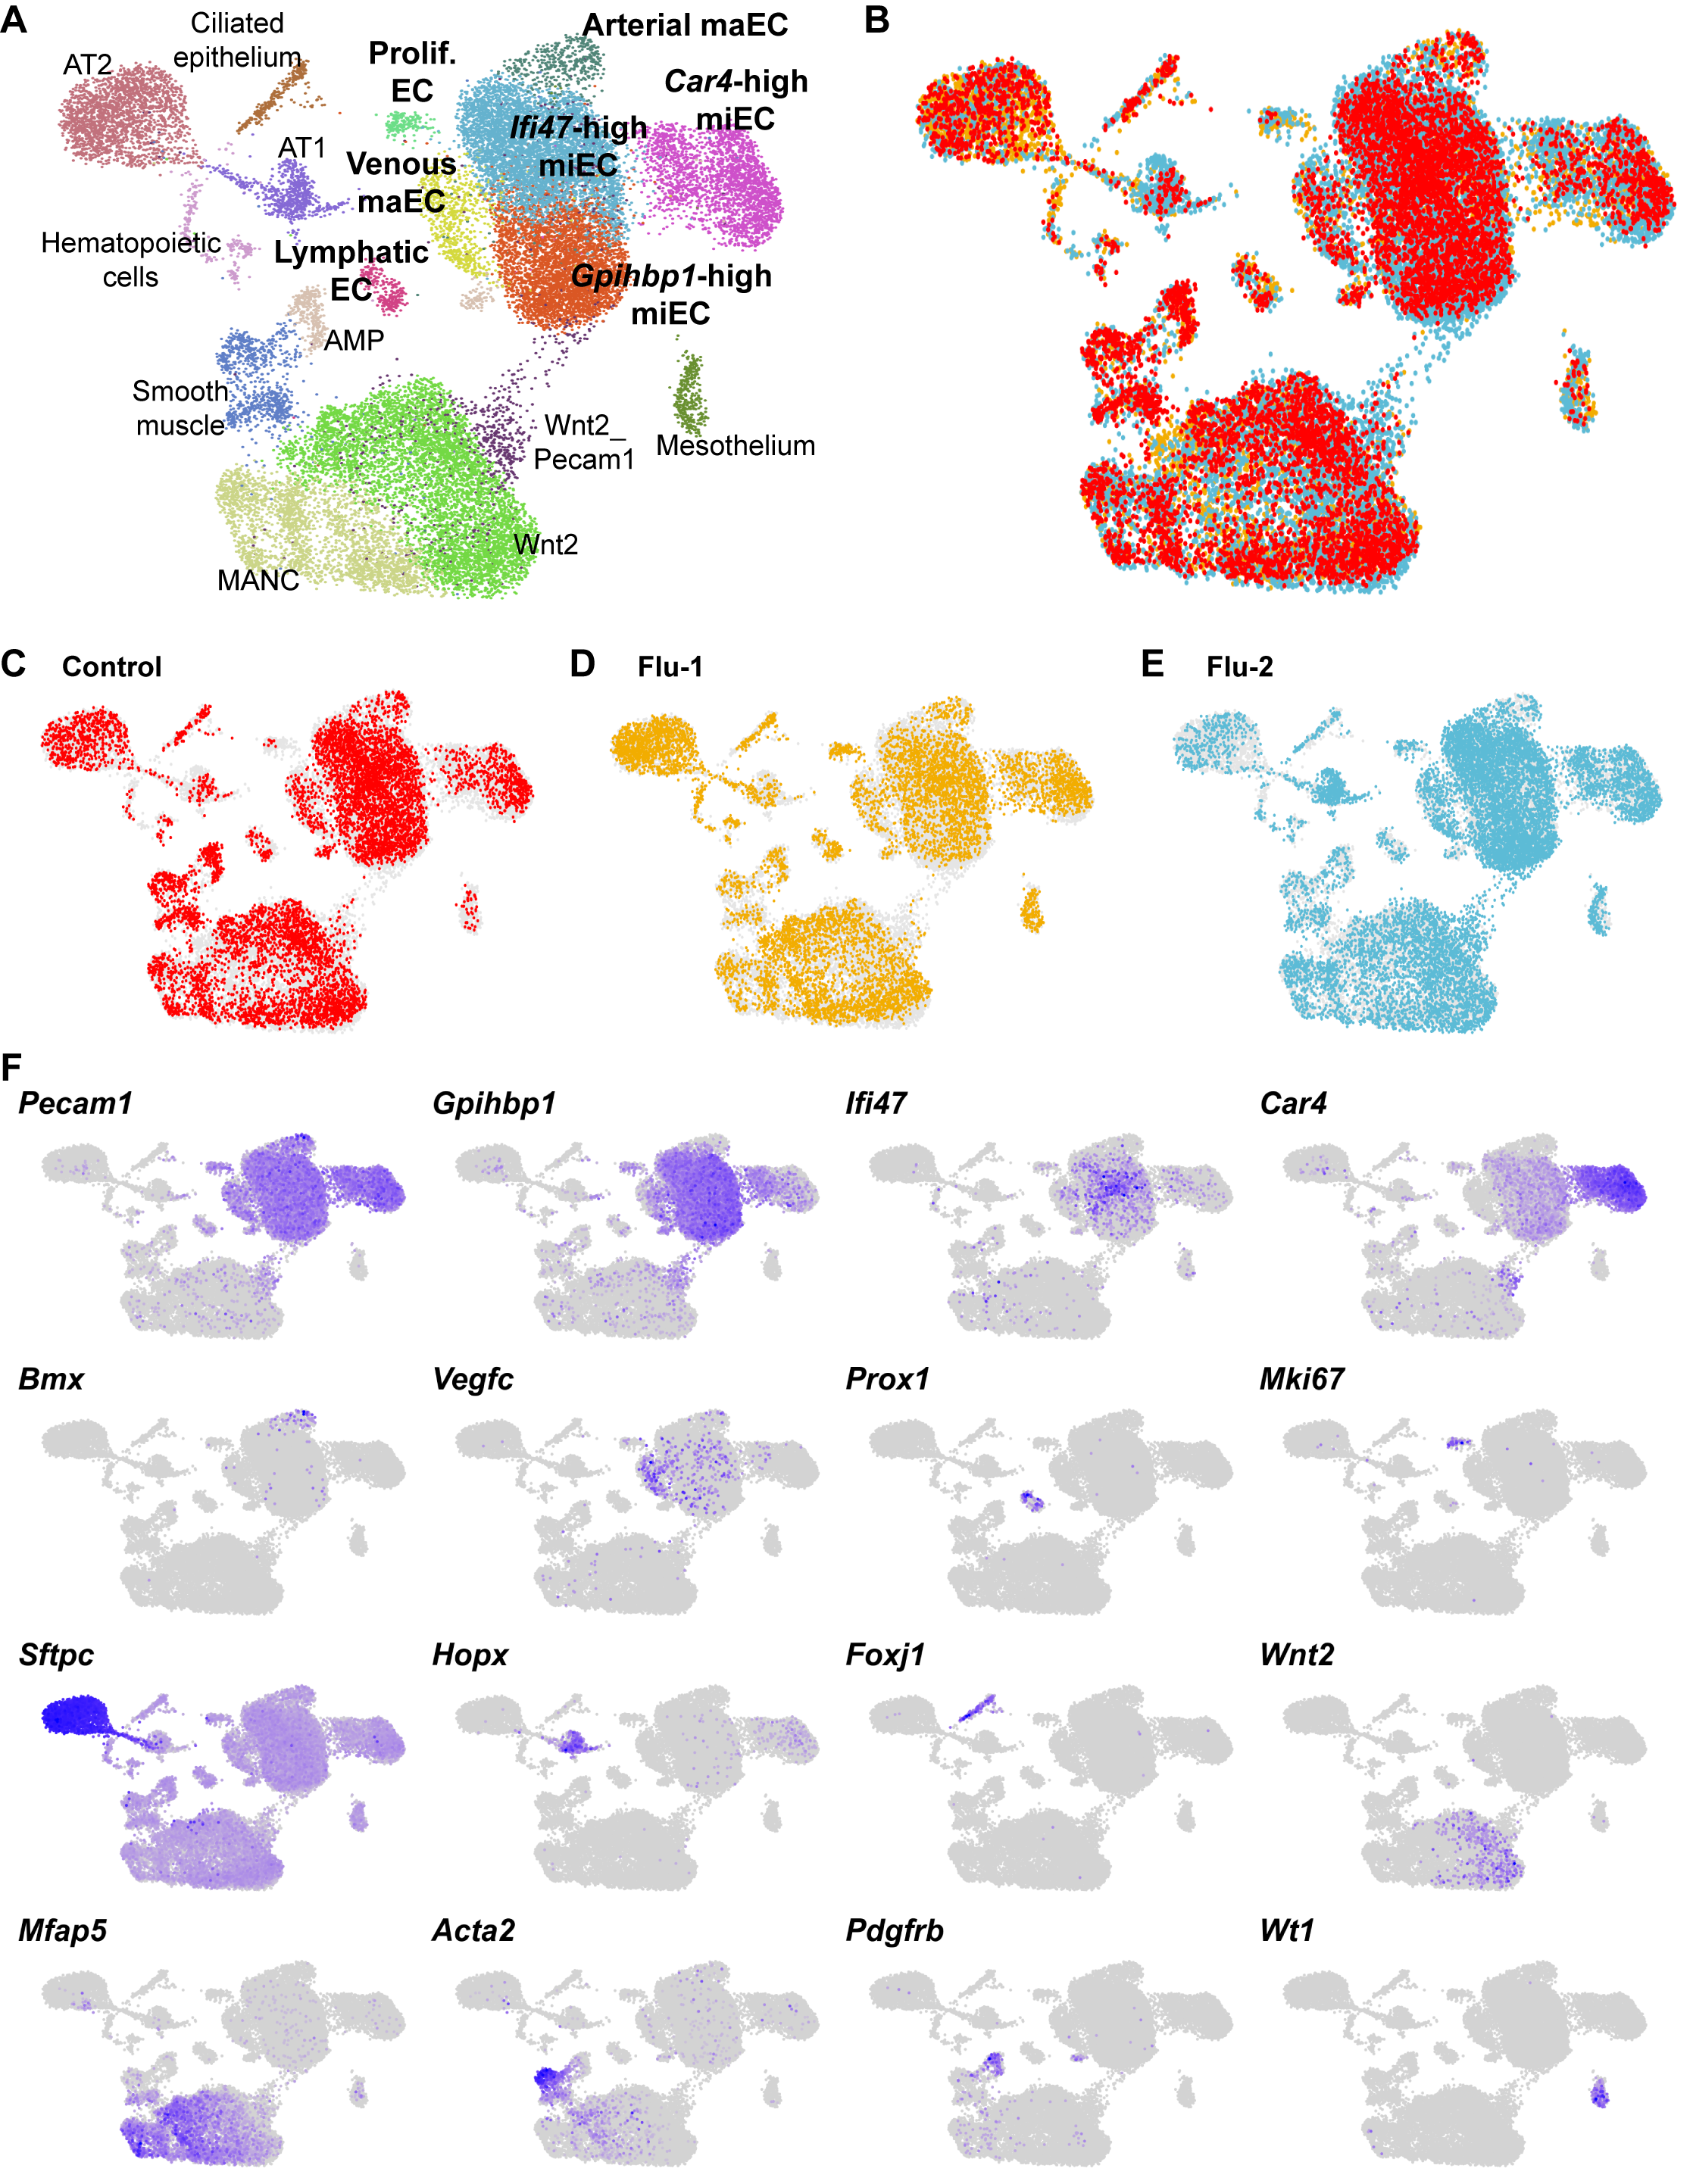

Supplement: supp [file elife-53072-supp-v1.zip › elife_poa_e53072_Figure_4_figure_supplement_5.tif]

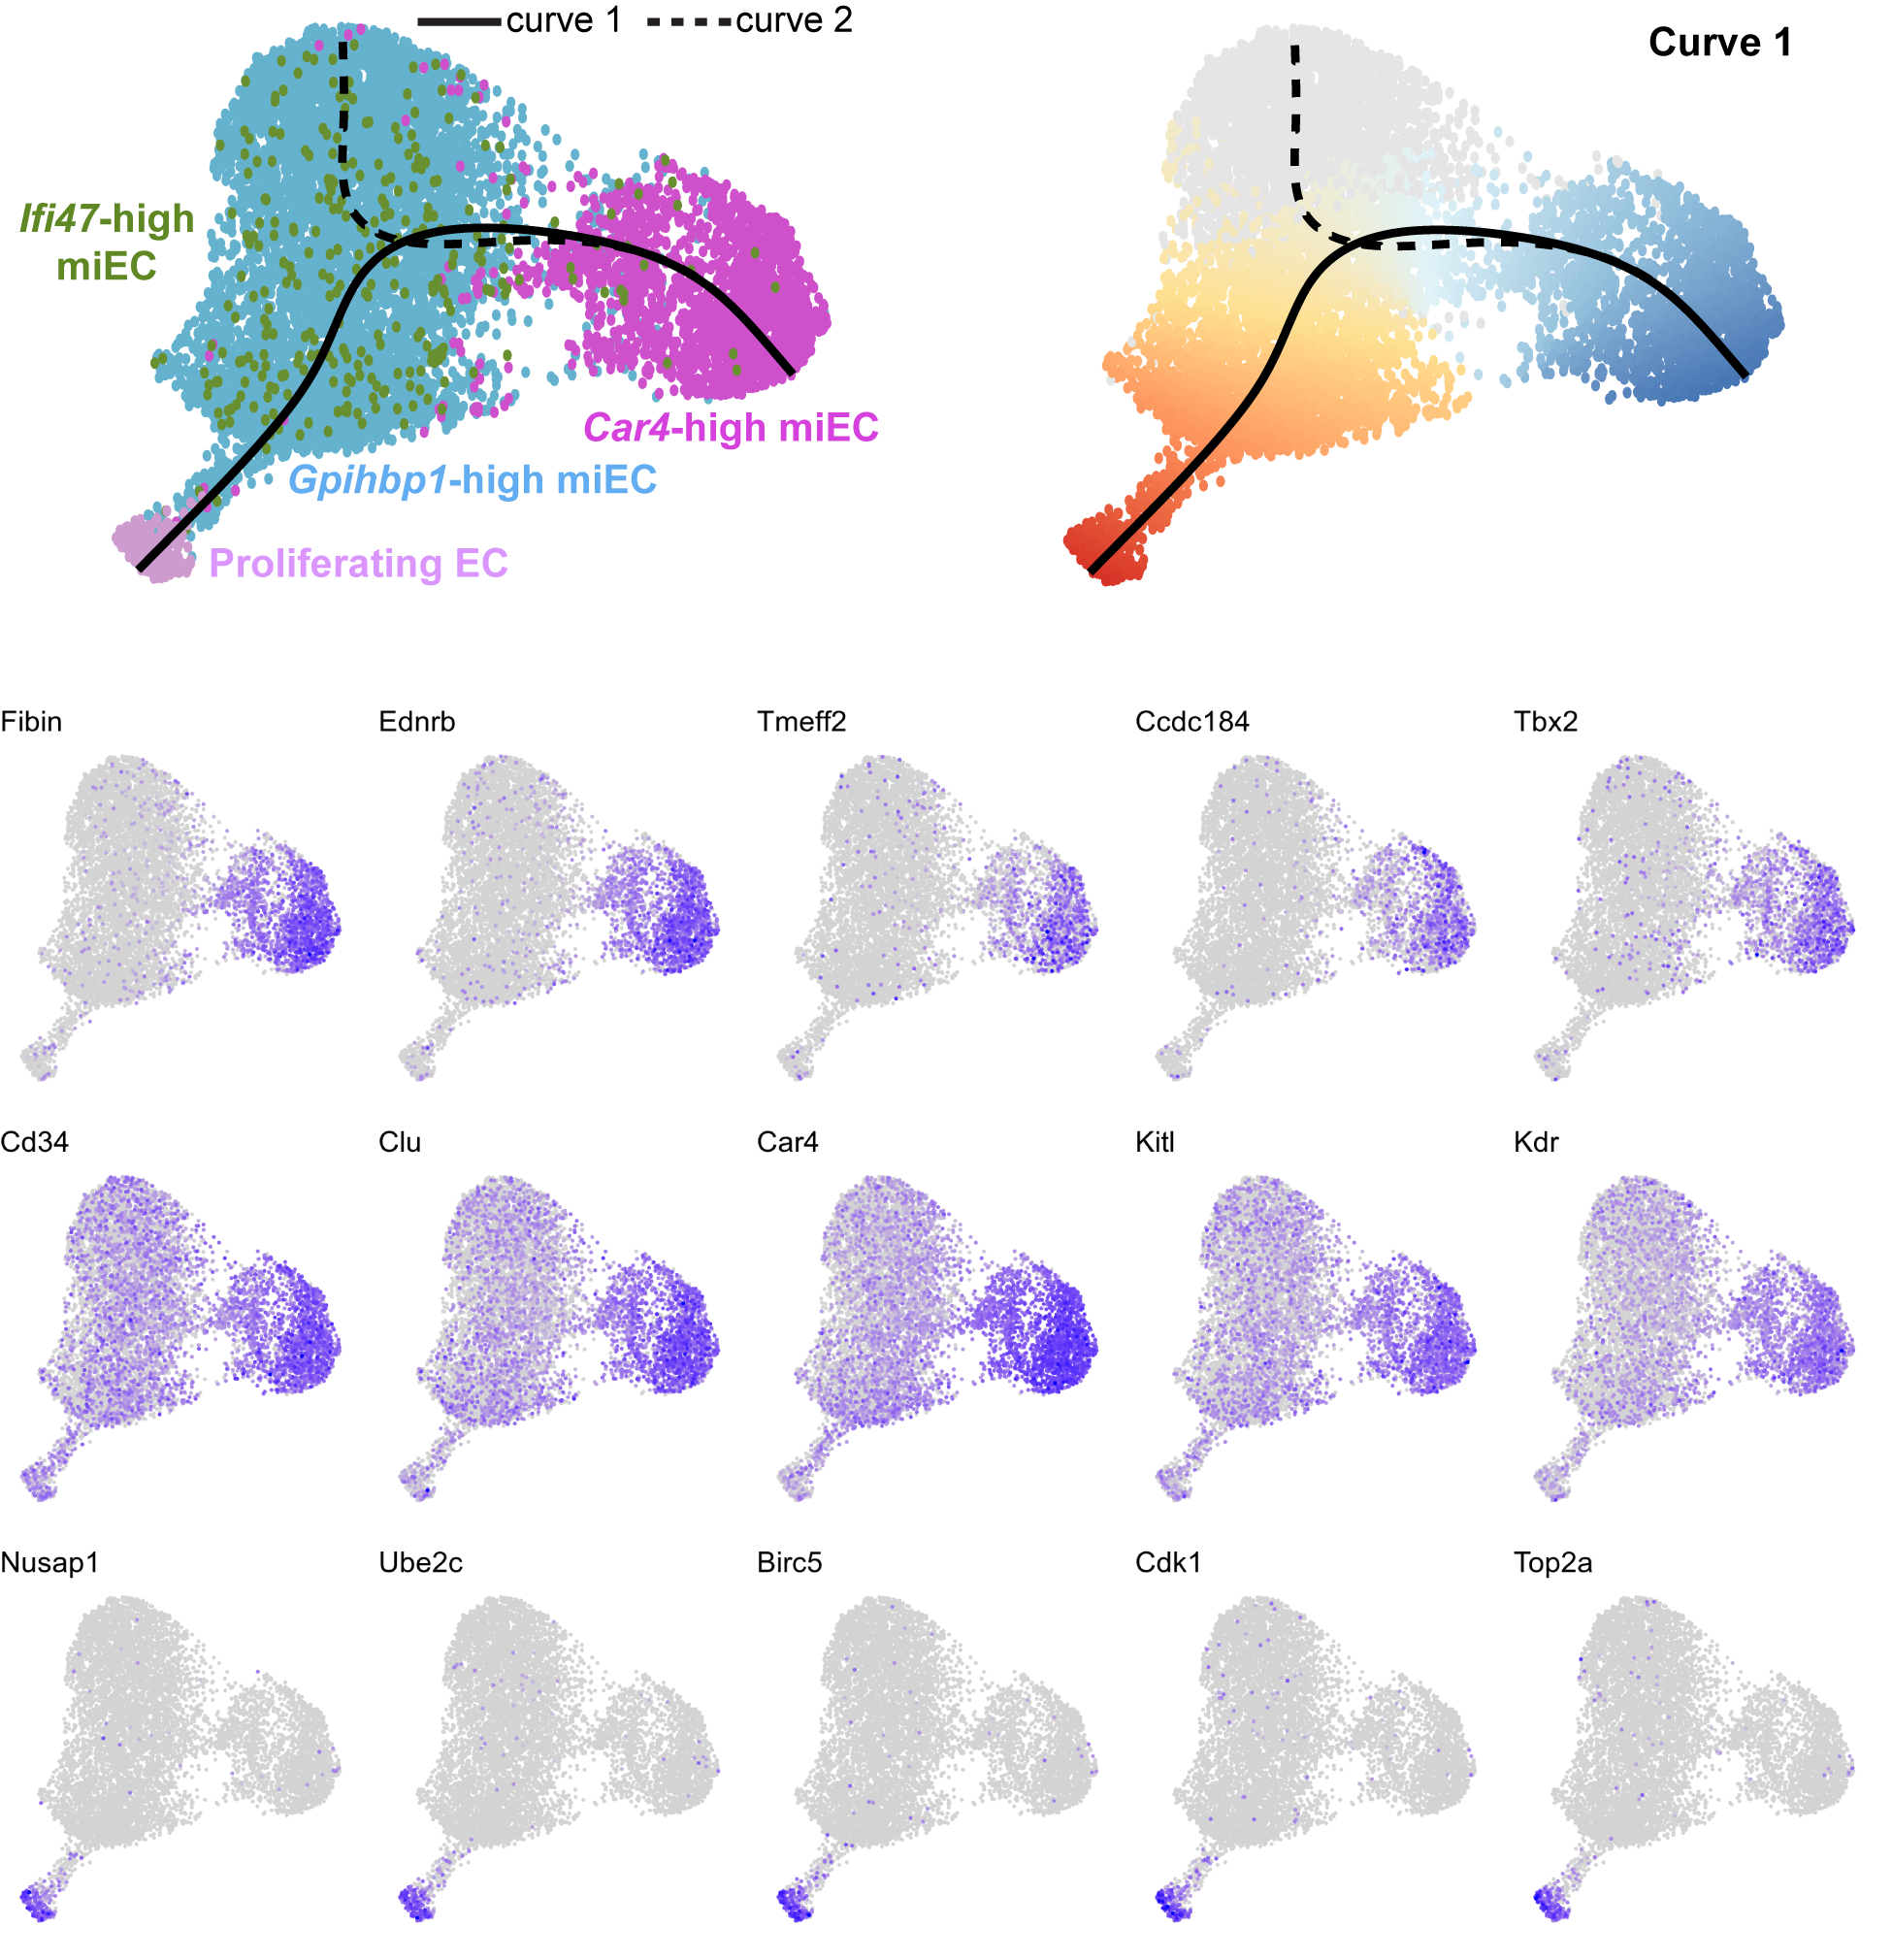

Supplement: supp [file elife-53072-supp-v1.zip › elife_poa_e53072_Figure_6_figure_supplement_1.tif]

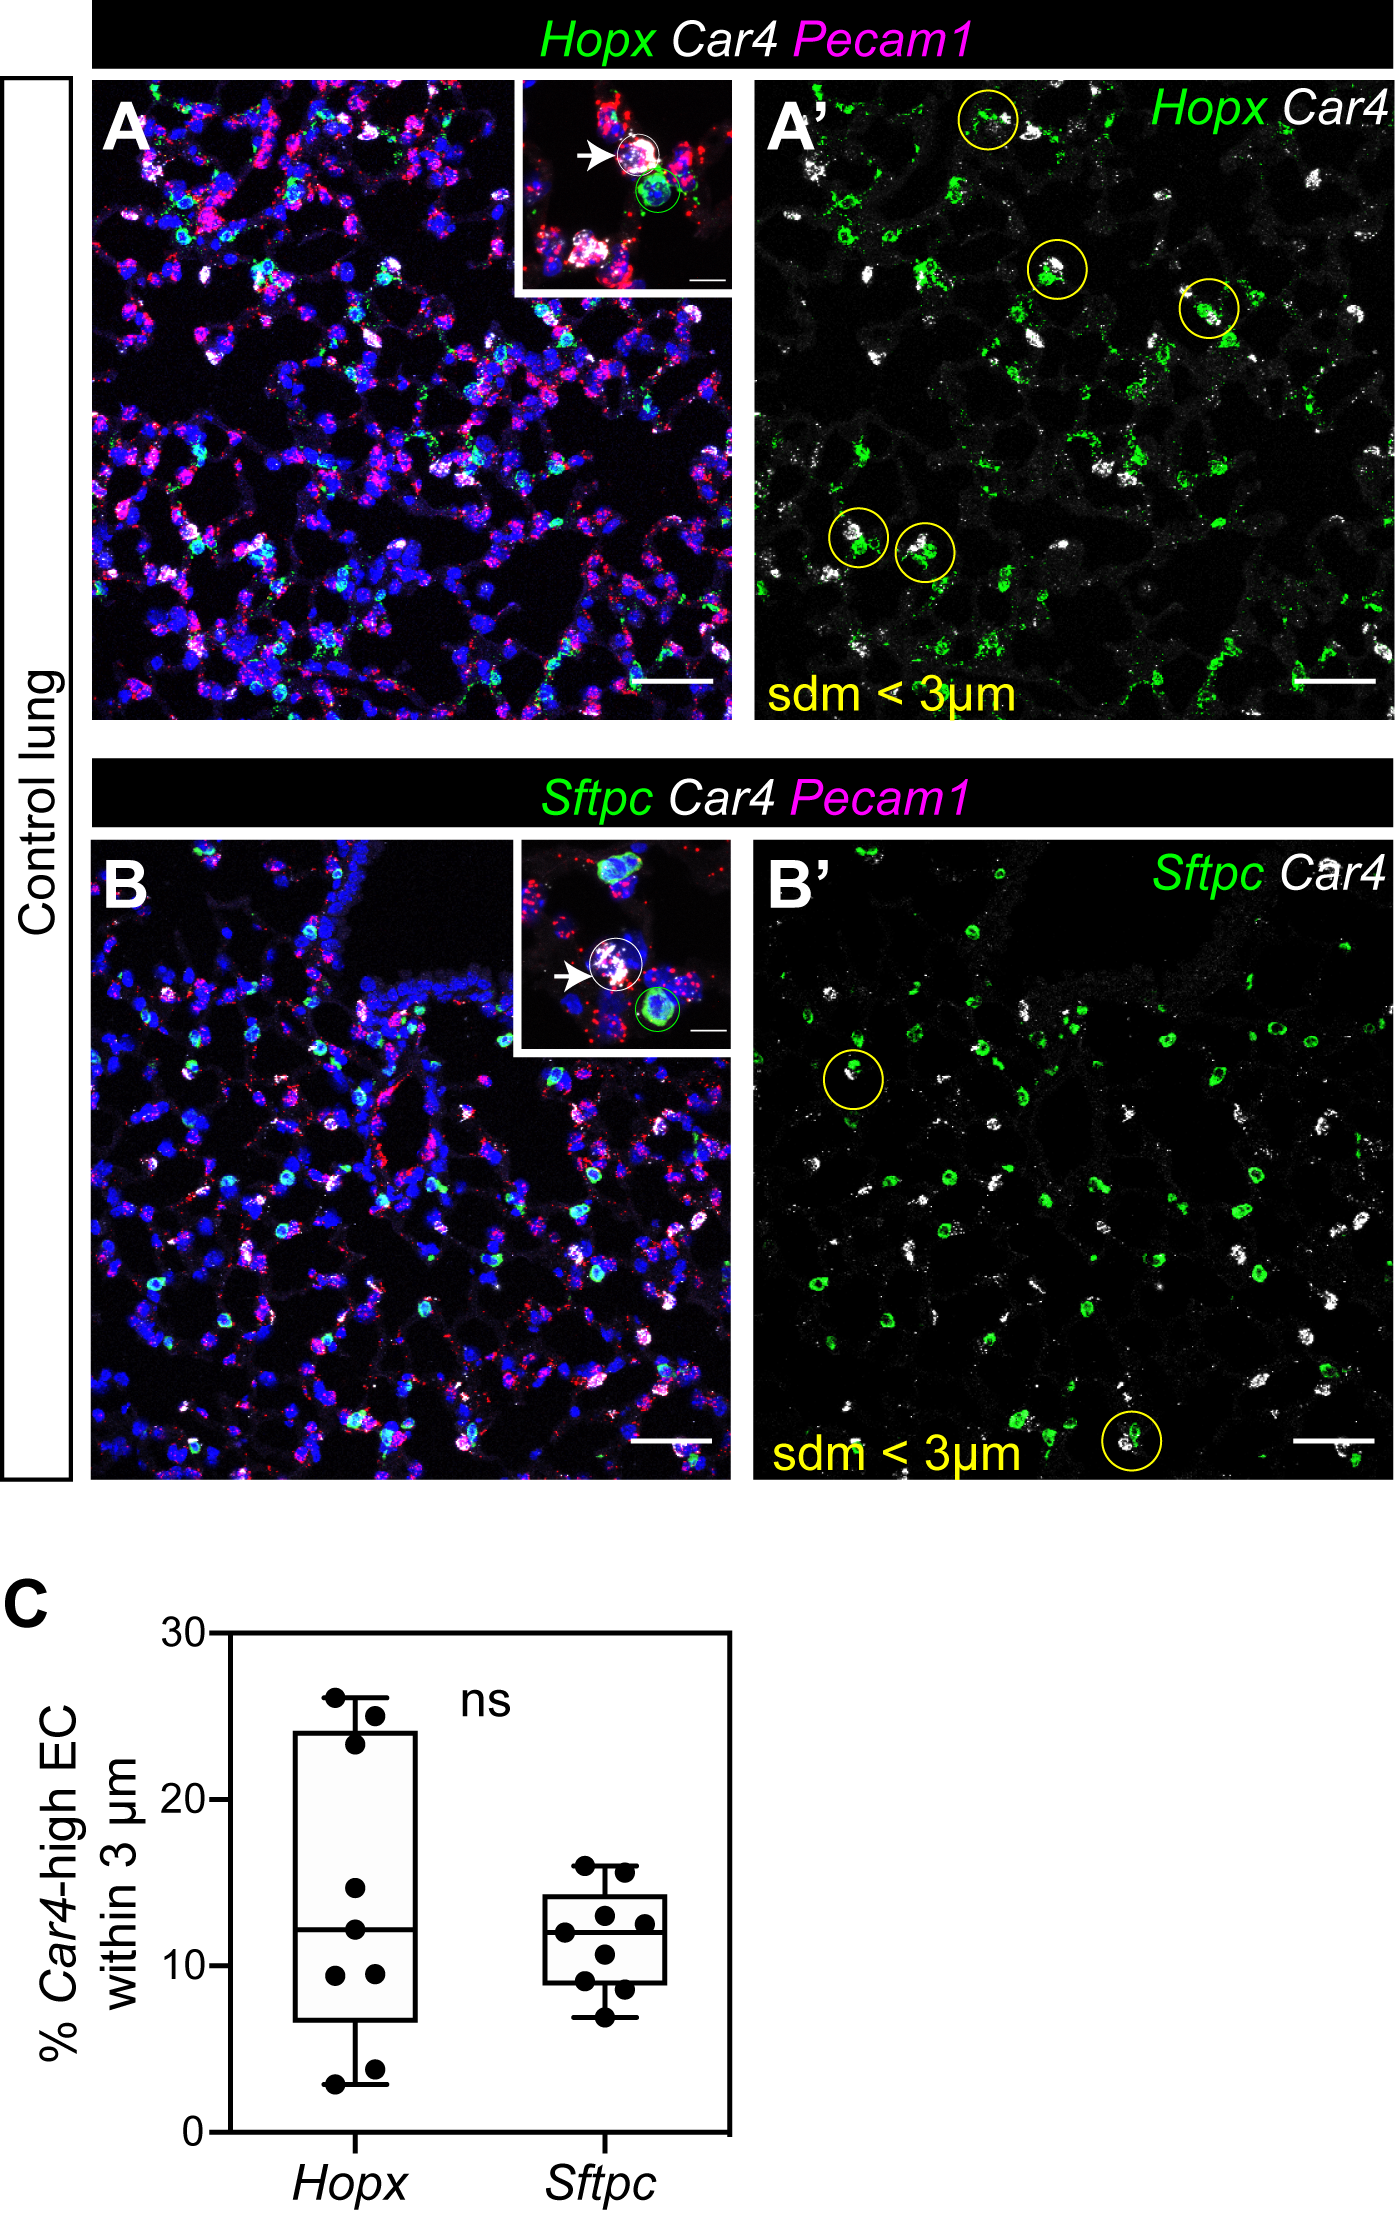

Supplement: supp [file elife-53072-supp-v1.zip › elife_poa_e53072_Figure_3_figure_supplement_3.tif]

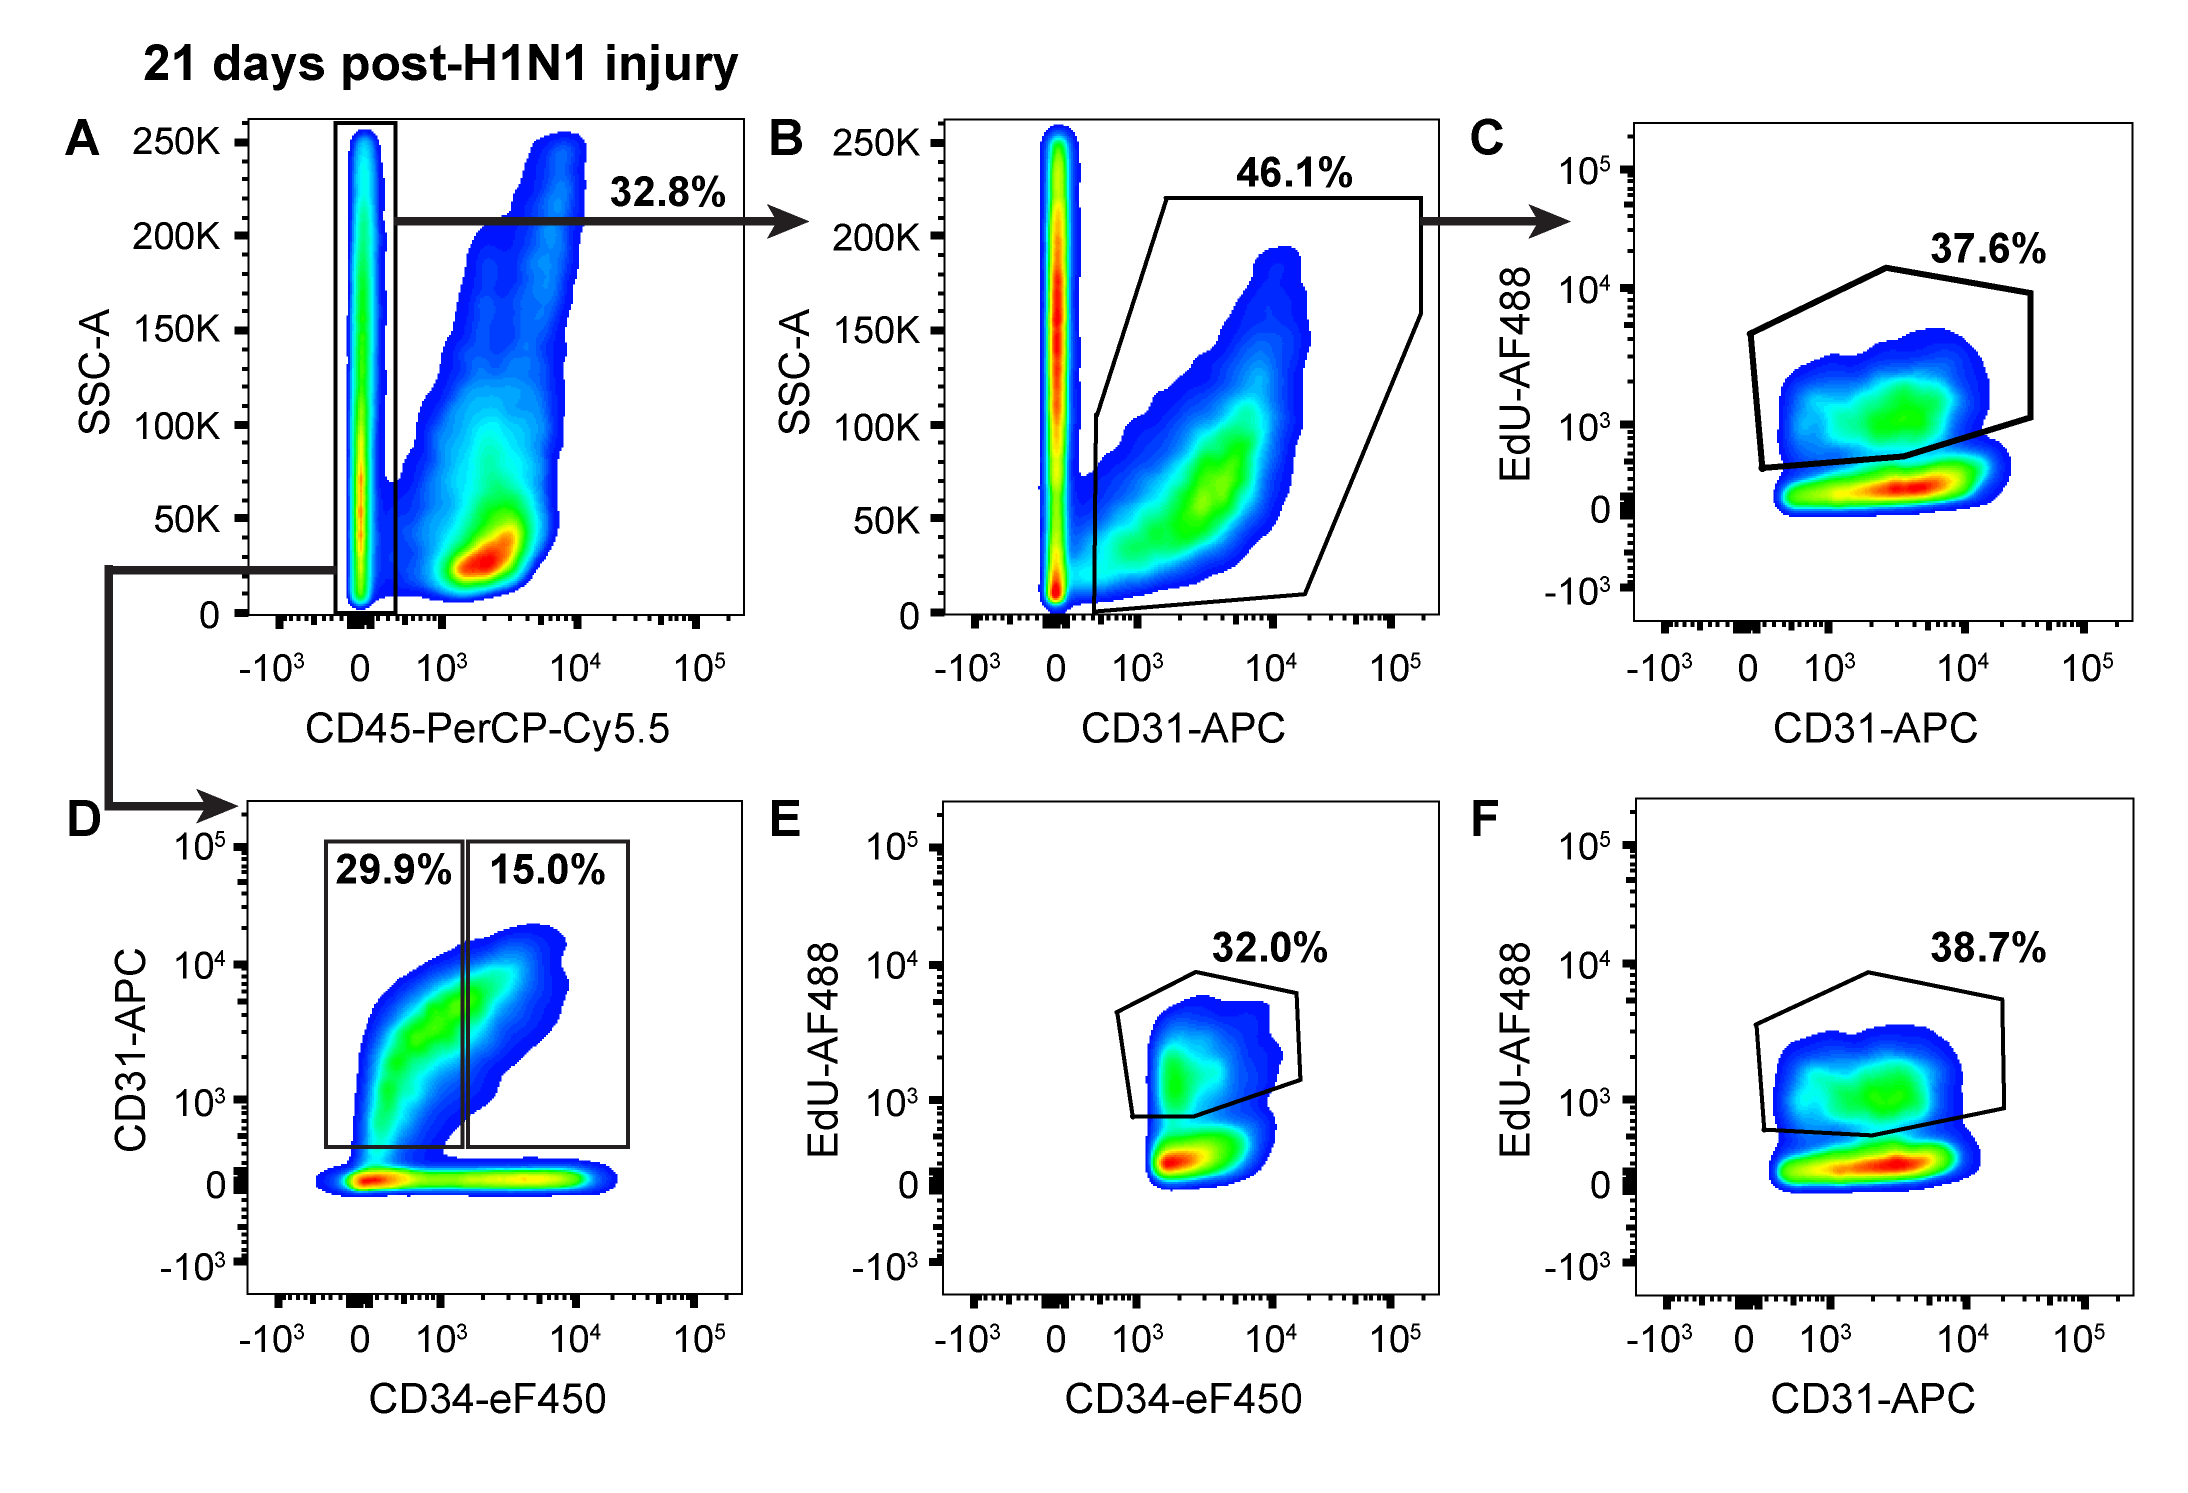

Supplement: supp [file elife-53072-supp-v1.zip › elife_poa_e53072_Figure_5_figure_supplement_4.tif]

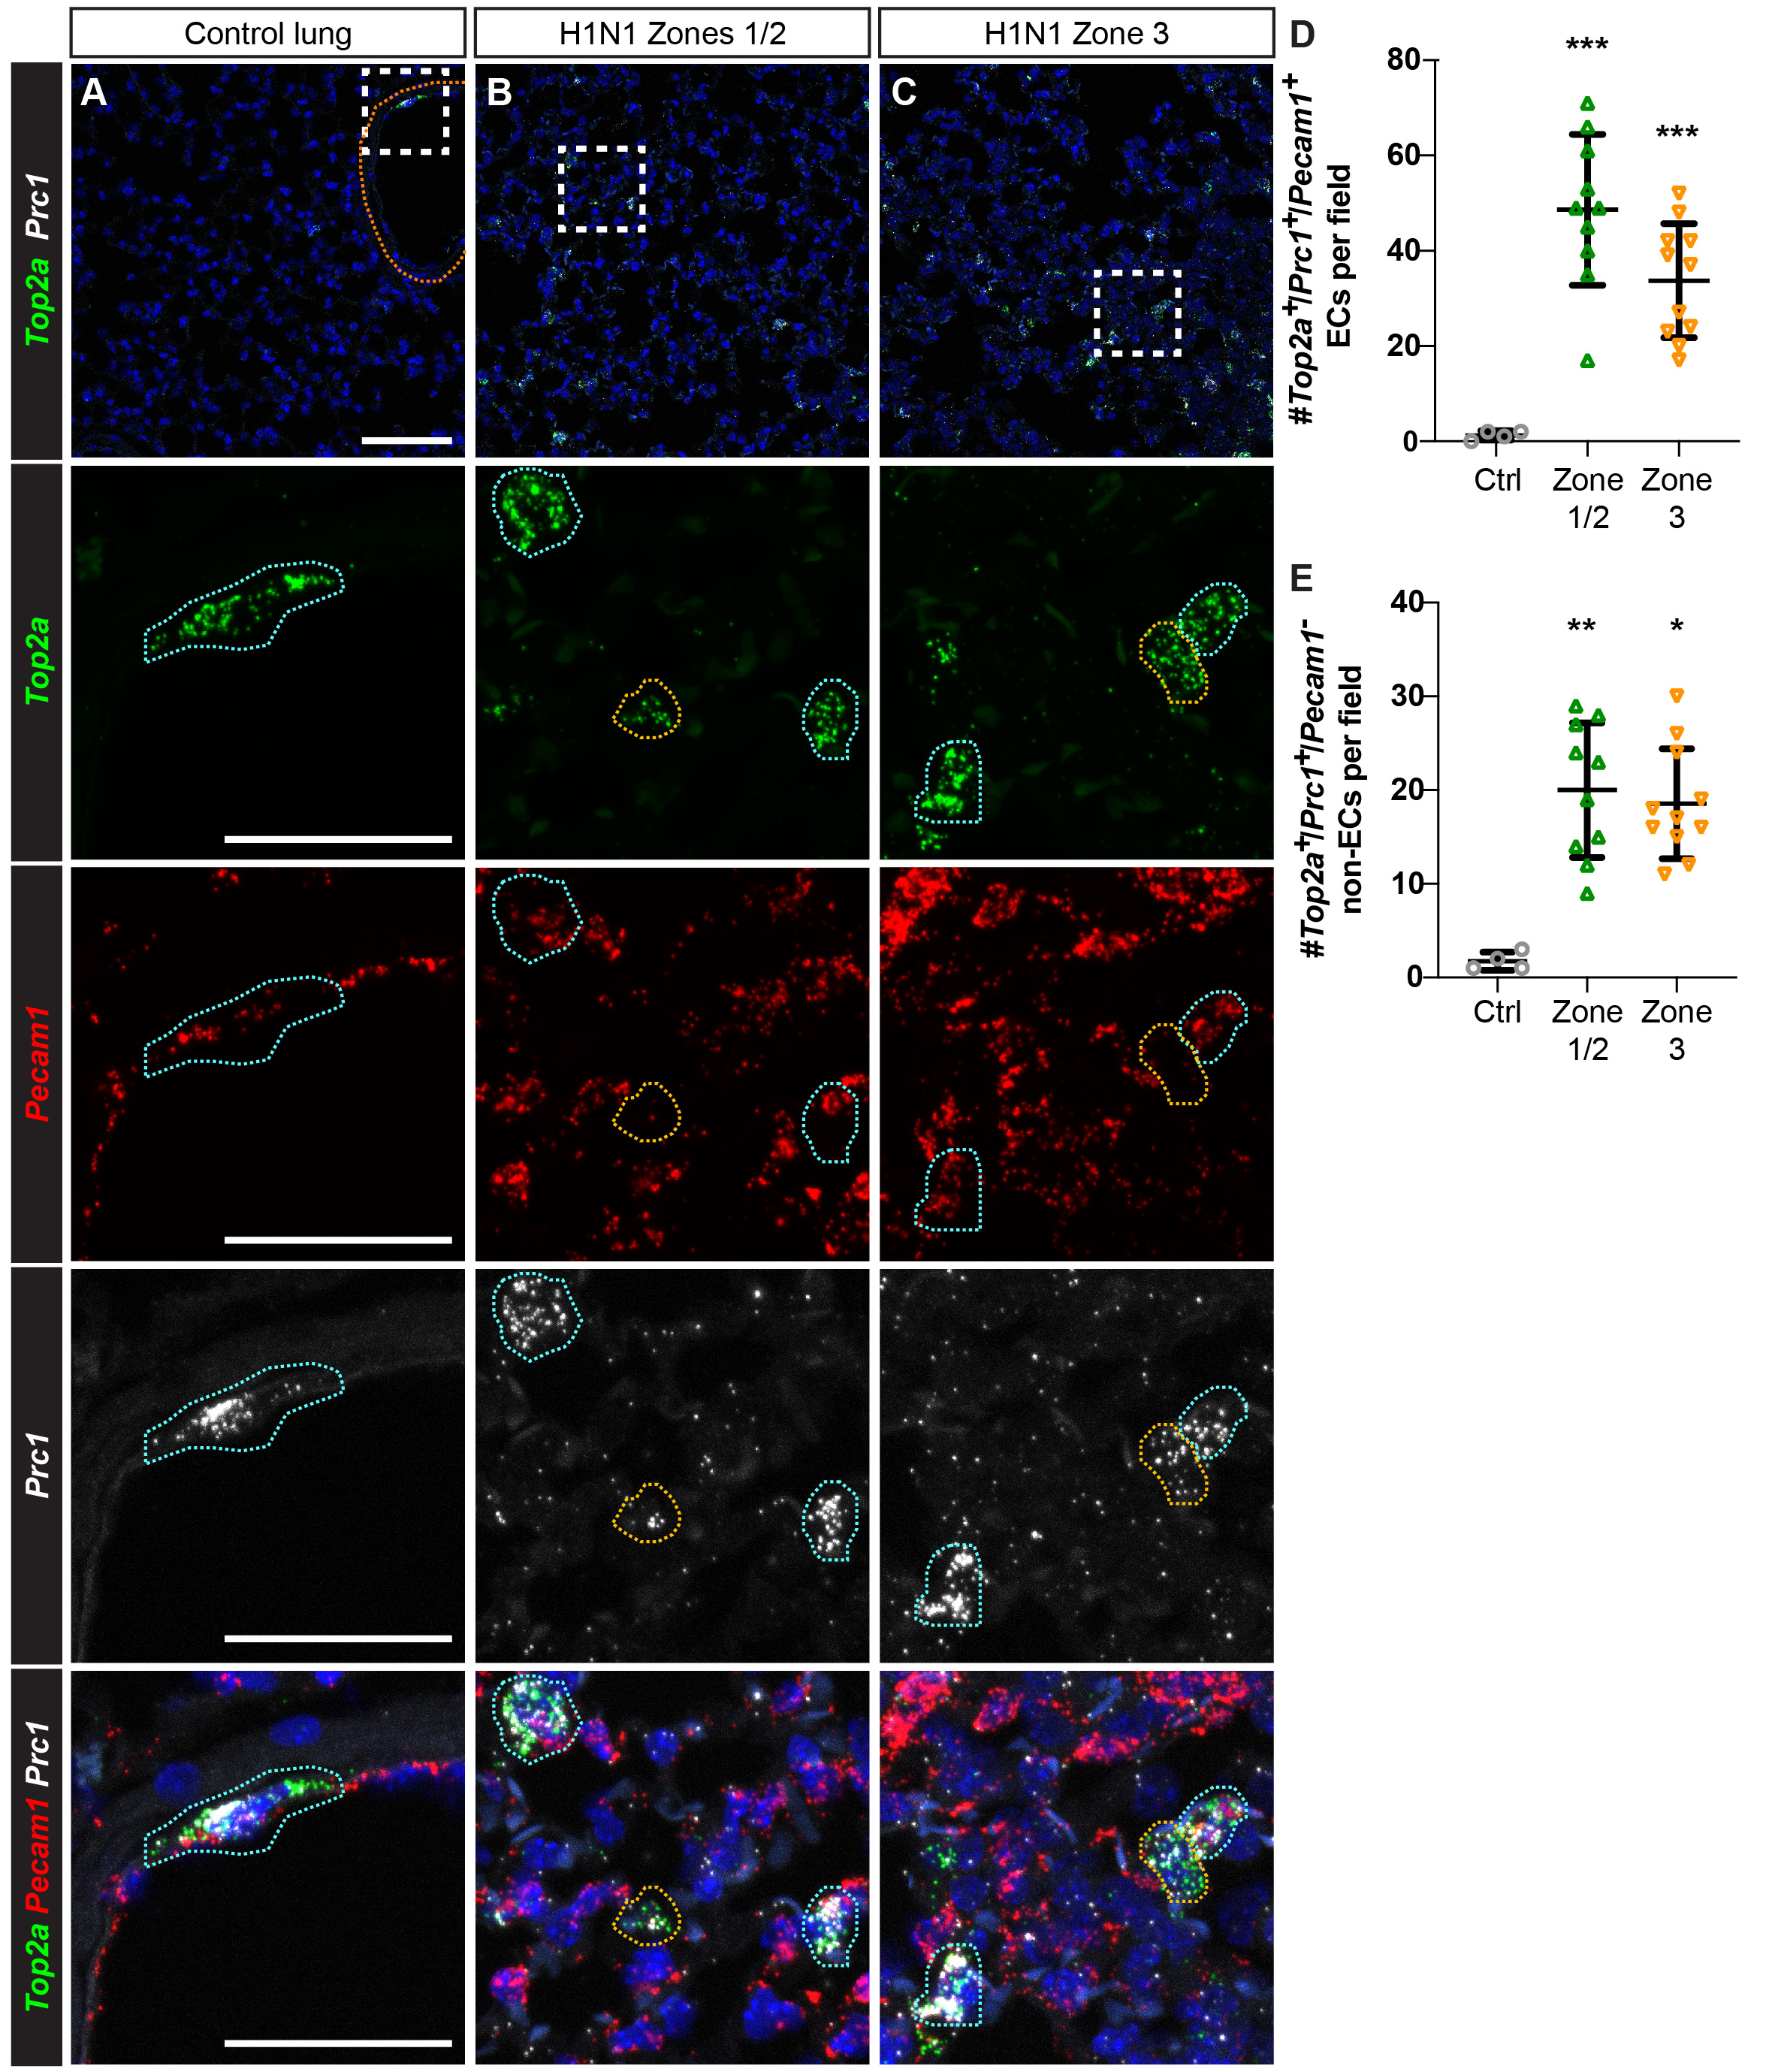

Supplement: supp [file elife-53072-supp-v1.zip › elife_poa_e53072_Figure_5_figure_supplement_5.jpg]

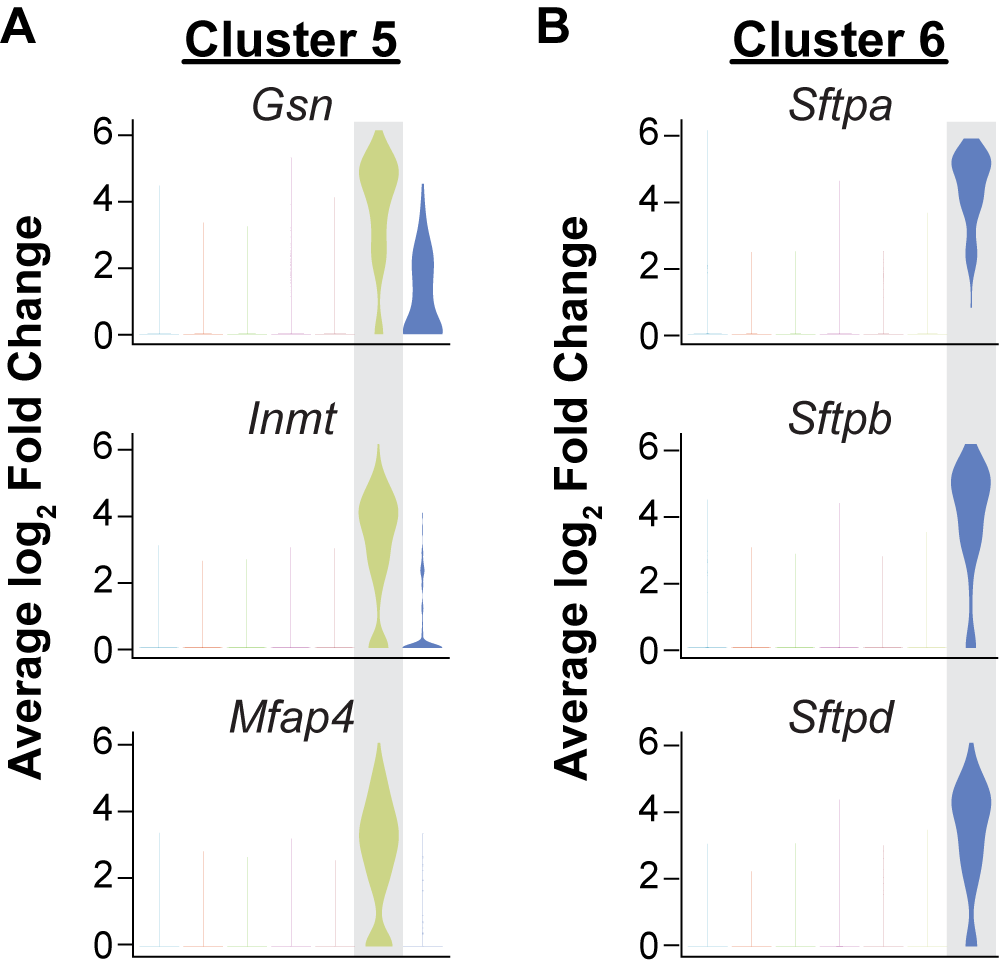

Supplement: supp [file elife-53072-supp-v1.zip › elife_poa_e53072_Figure_1_figure_supplement_1.tif]

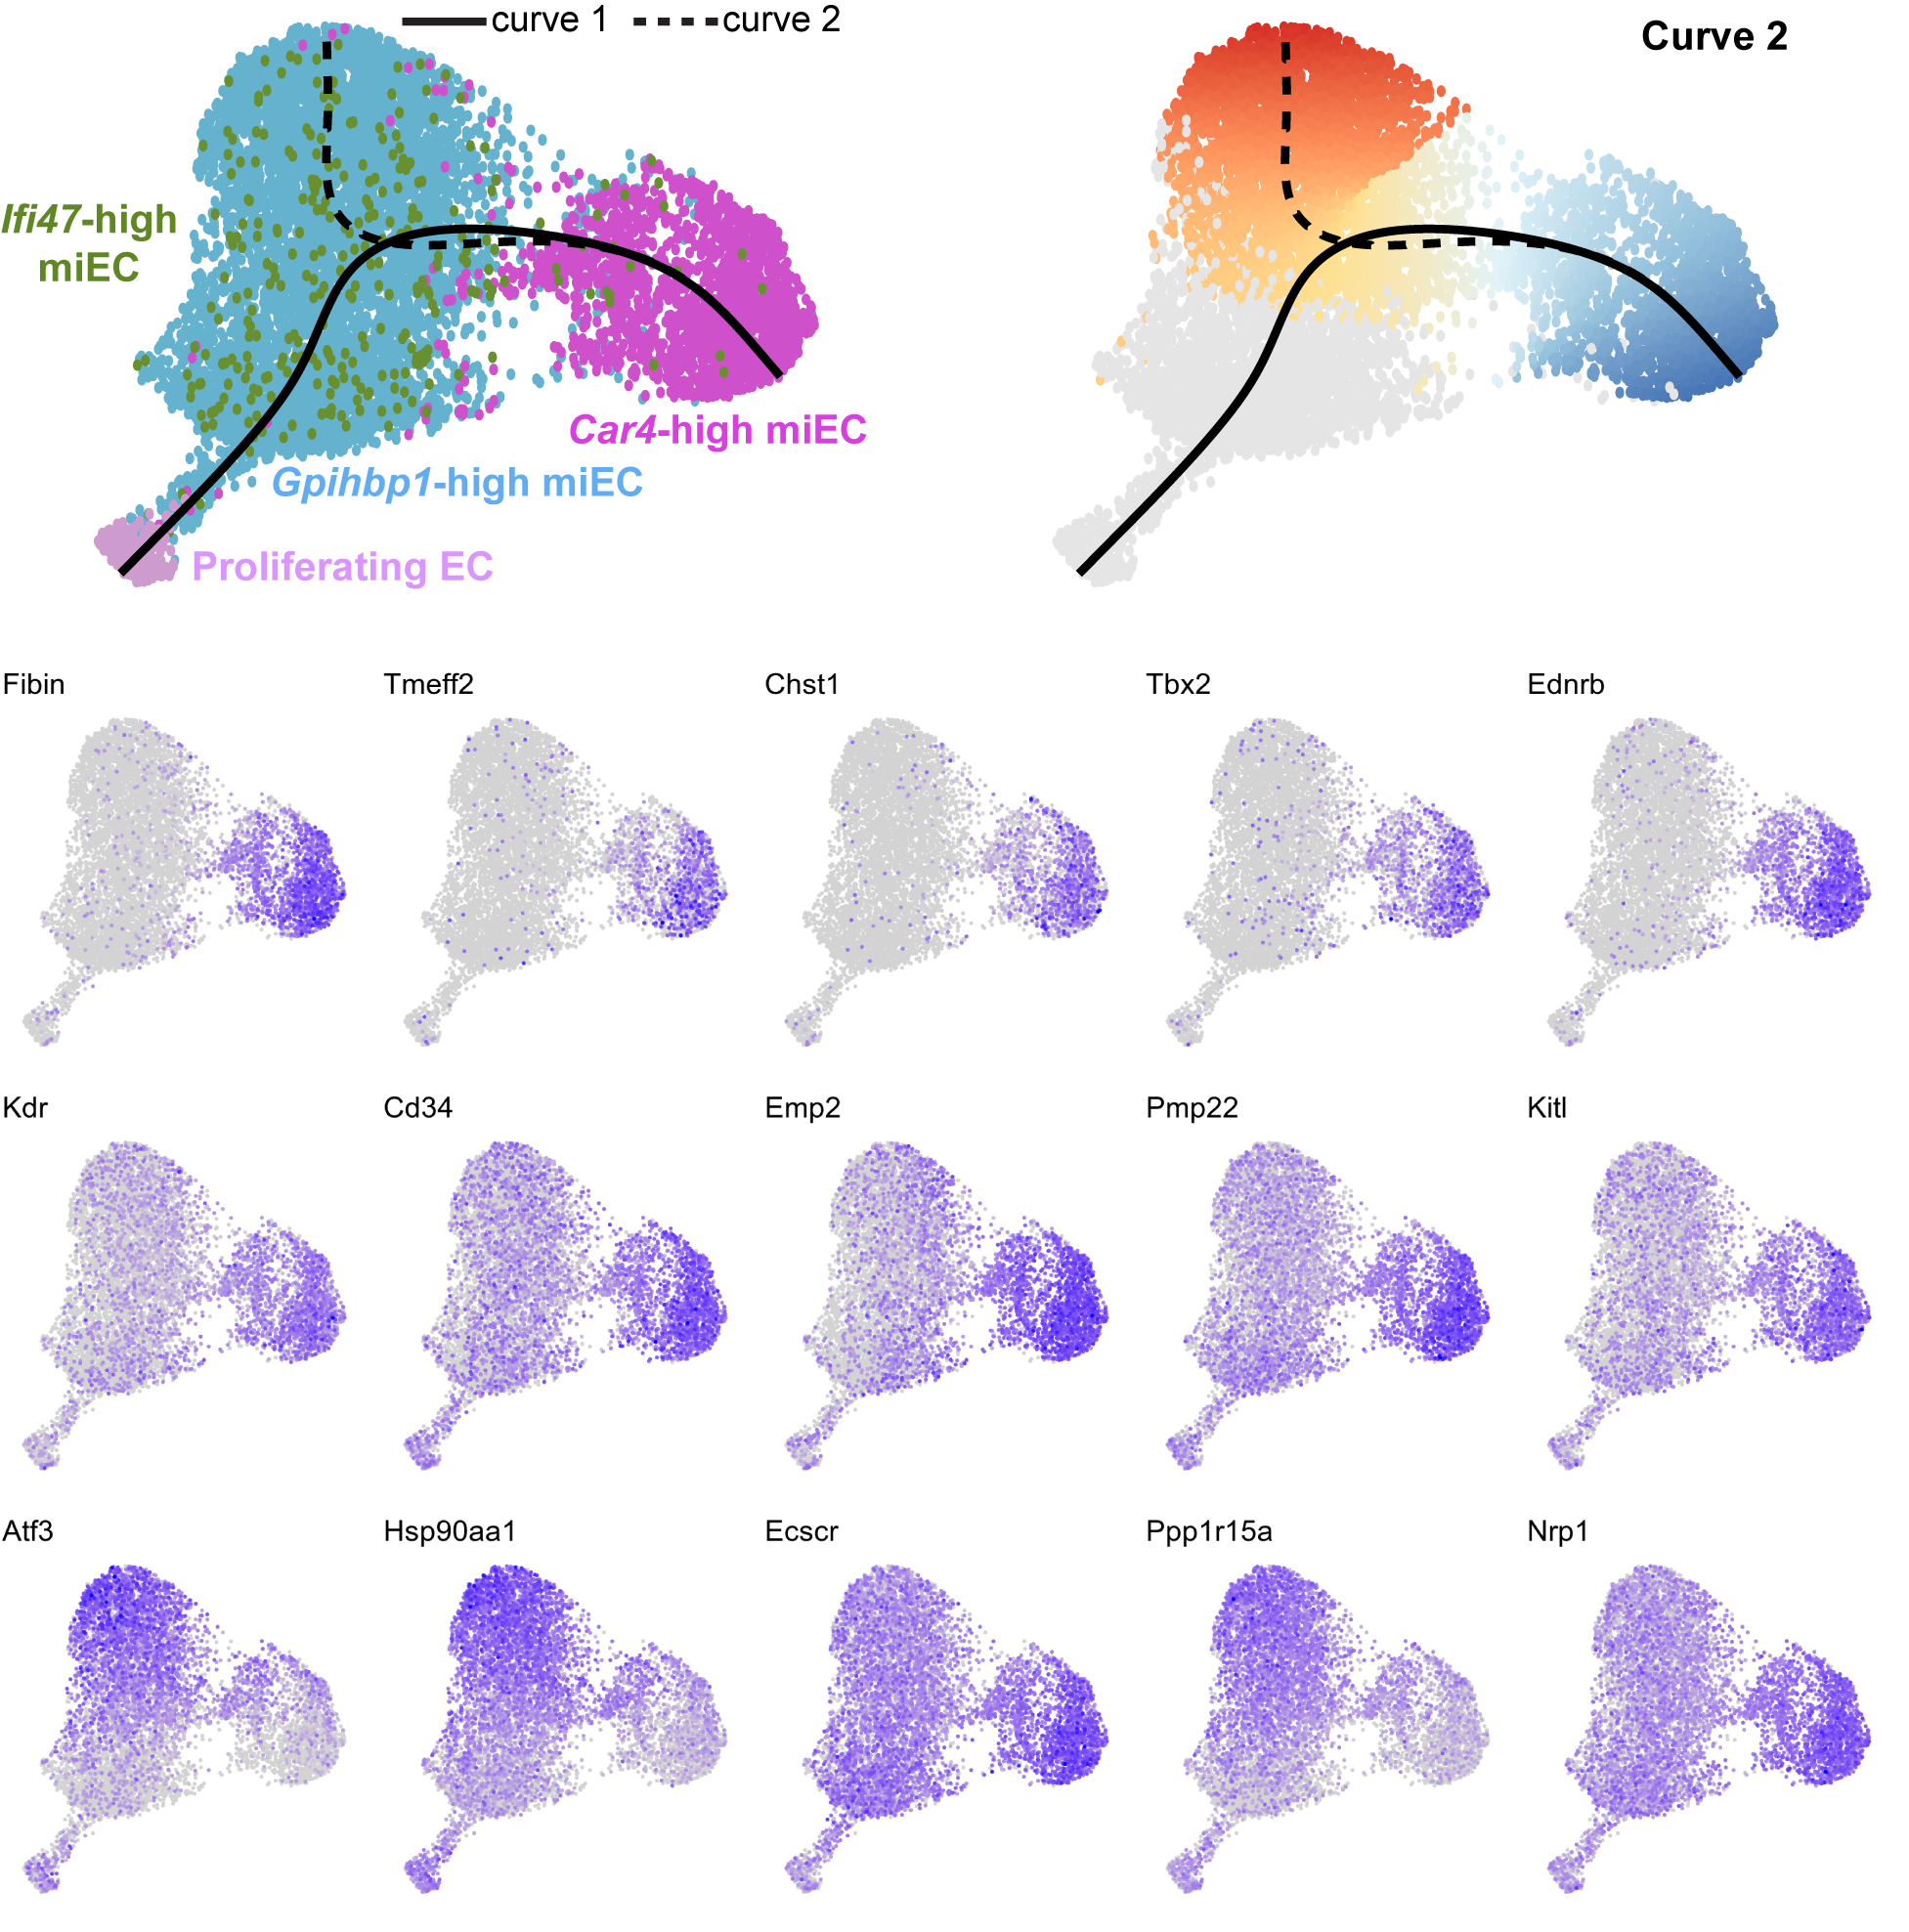

Supplement: supp [file elife-53072-supp-v1.zip › elife_poa_e53072_Figure_6_figure_supplement_2.tif]

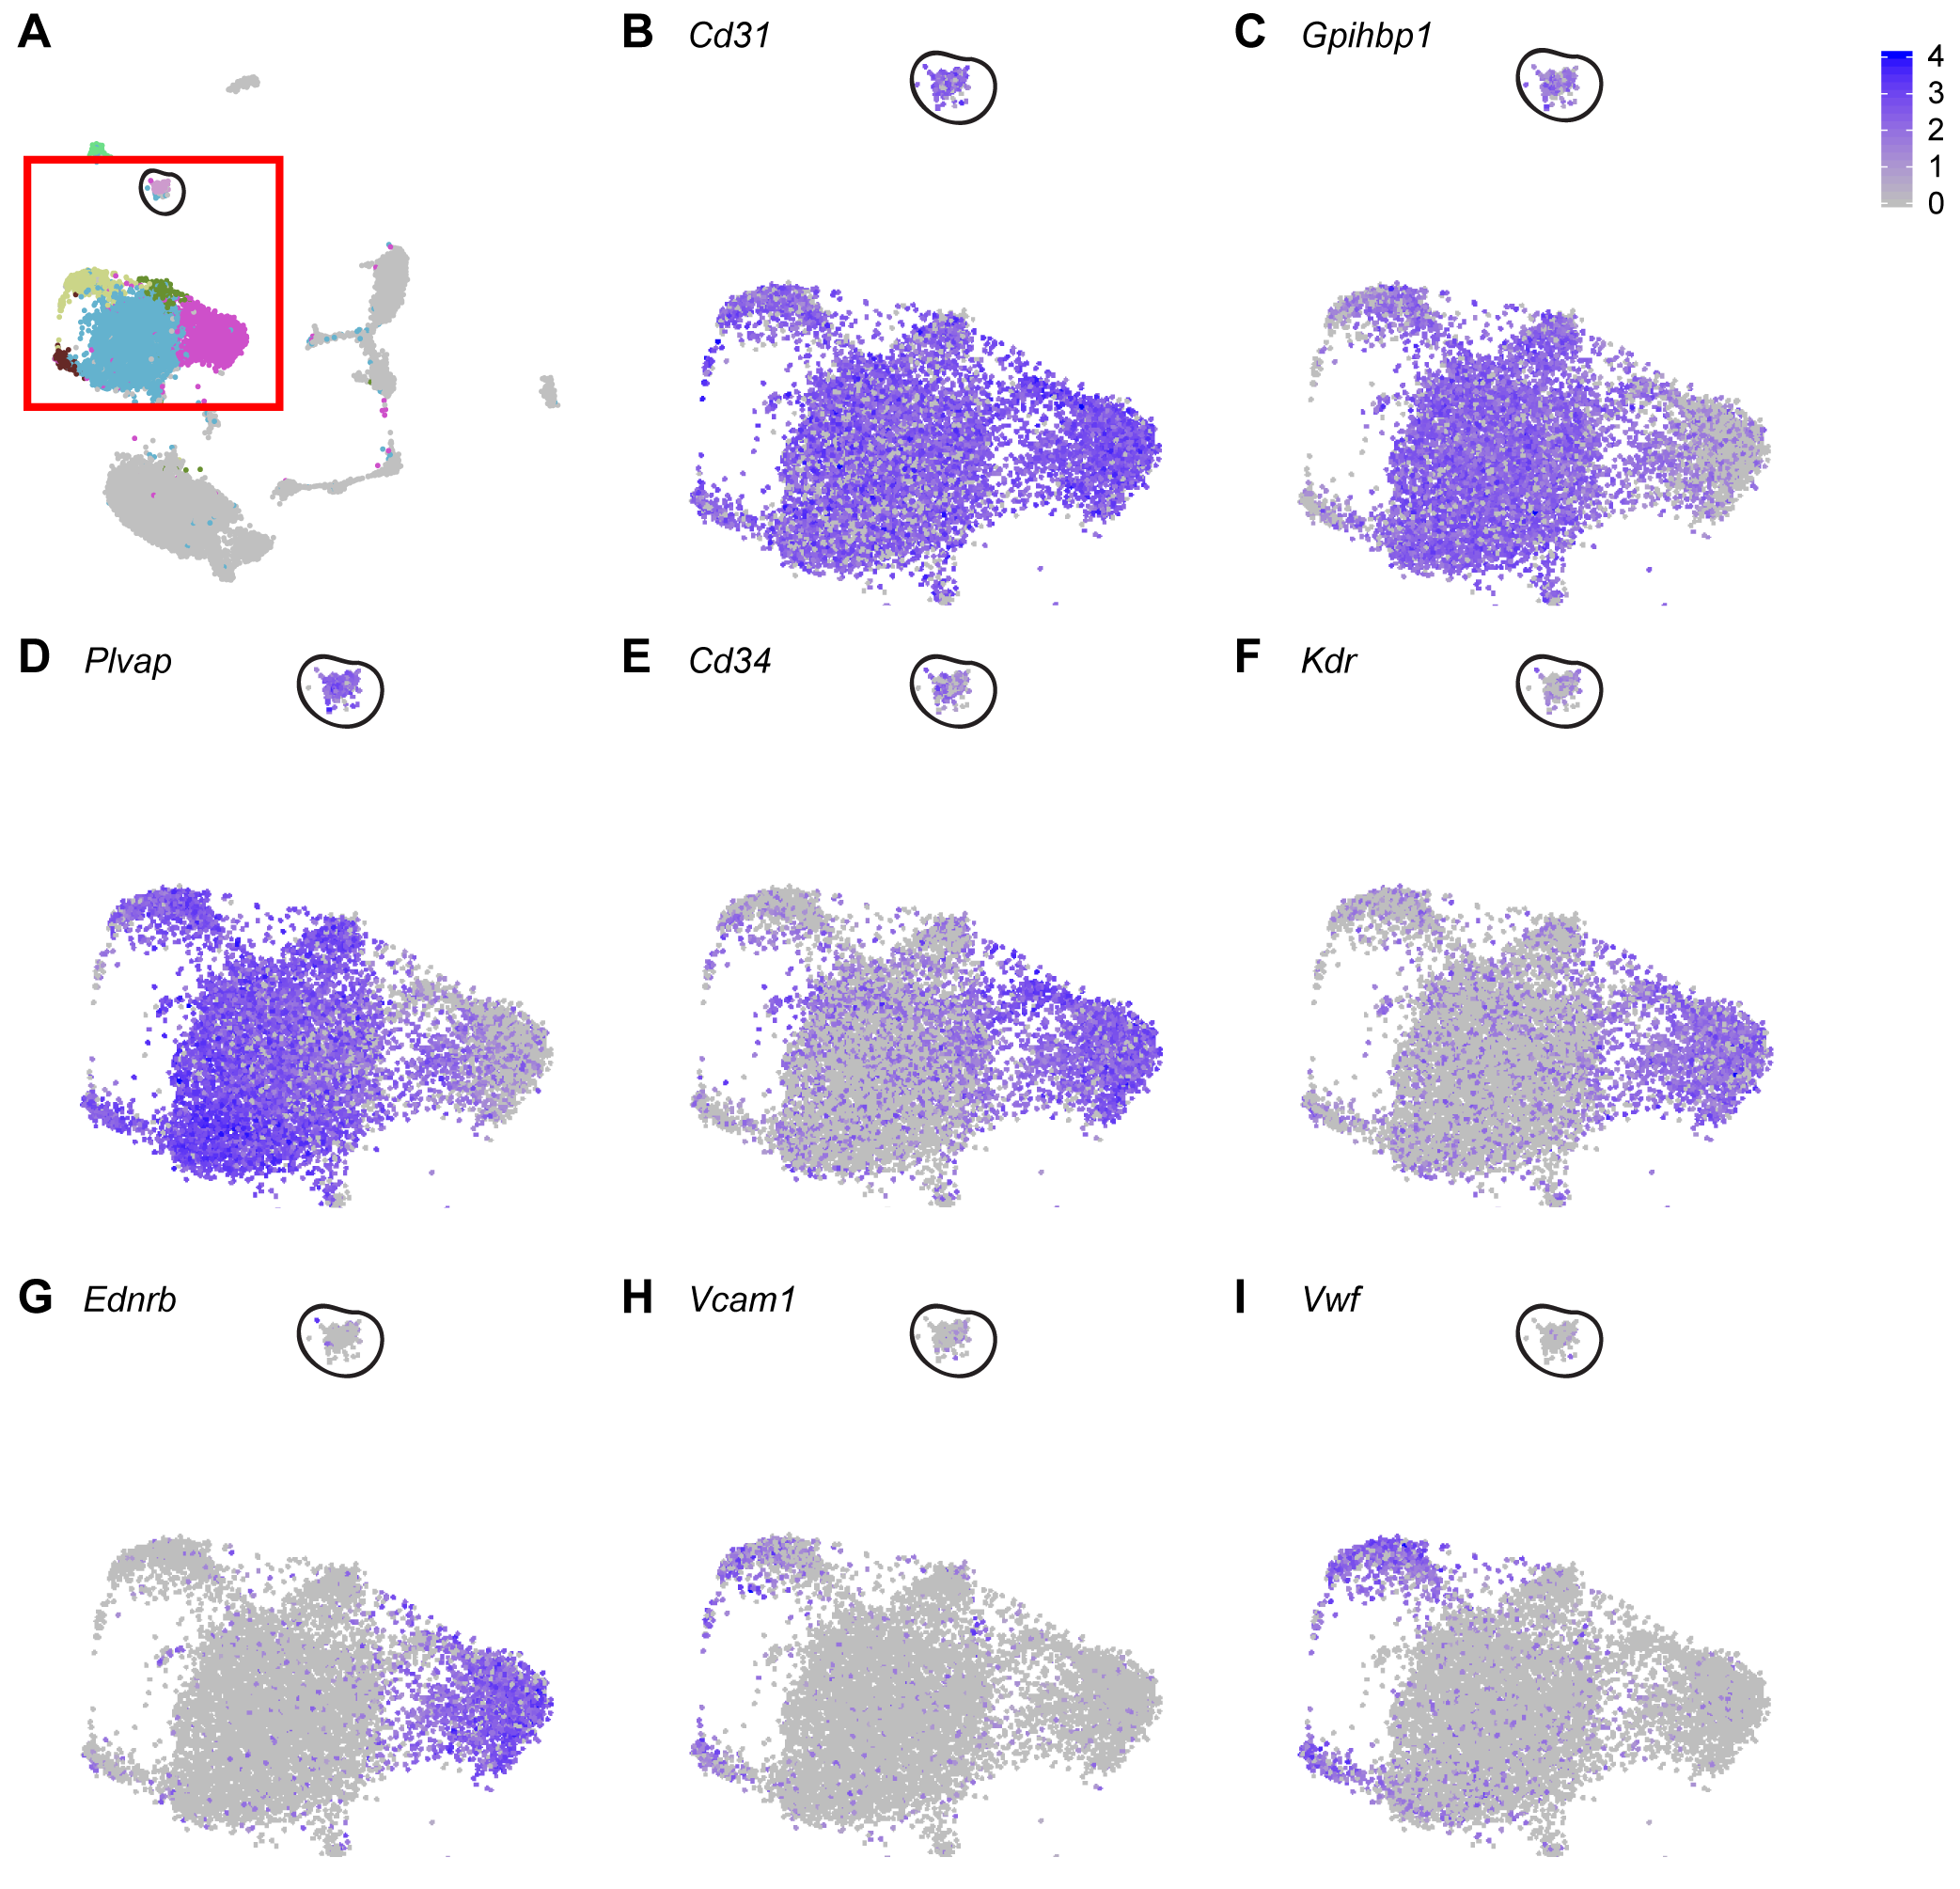

Supplement: supp [file elife-53072-supp-v1.zip › elife_poa_e53072_Figure_4_figure_supplement_4.tif]

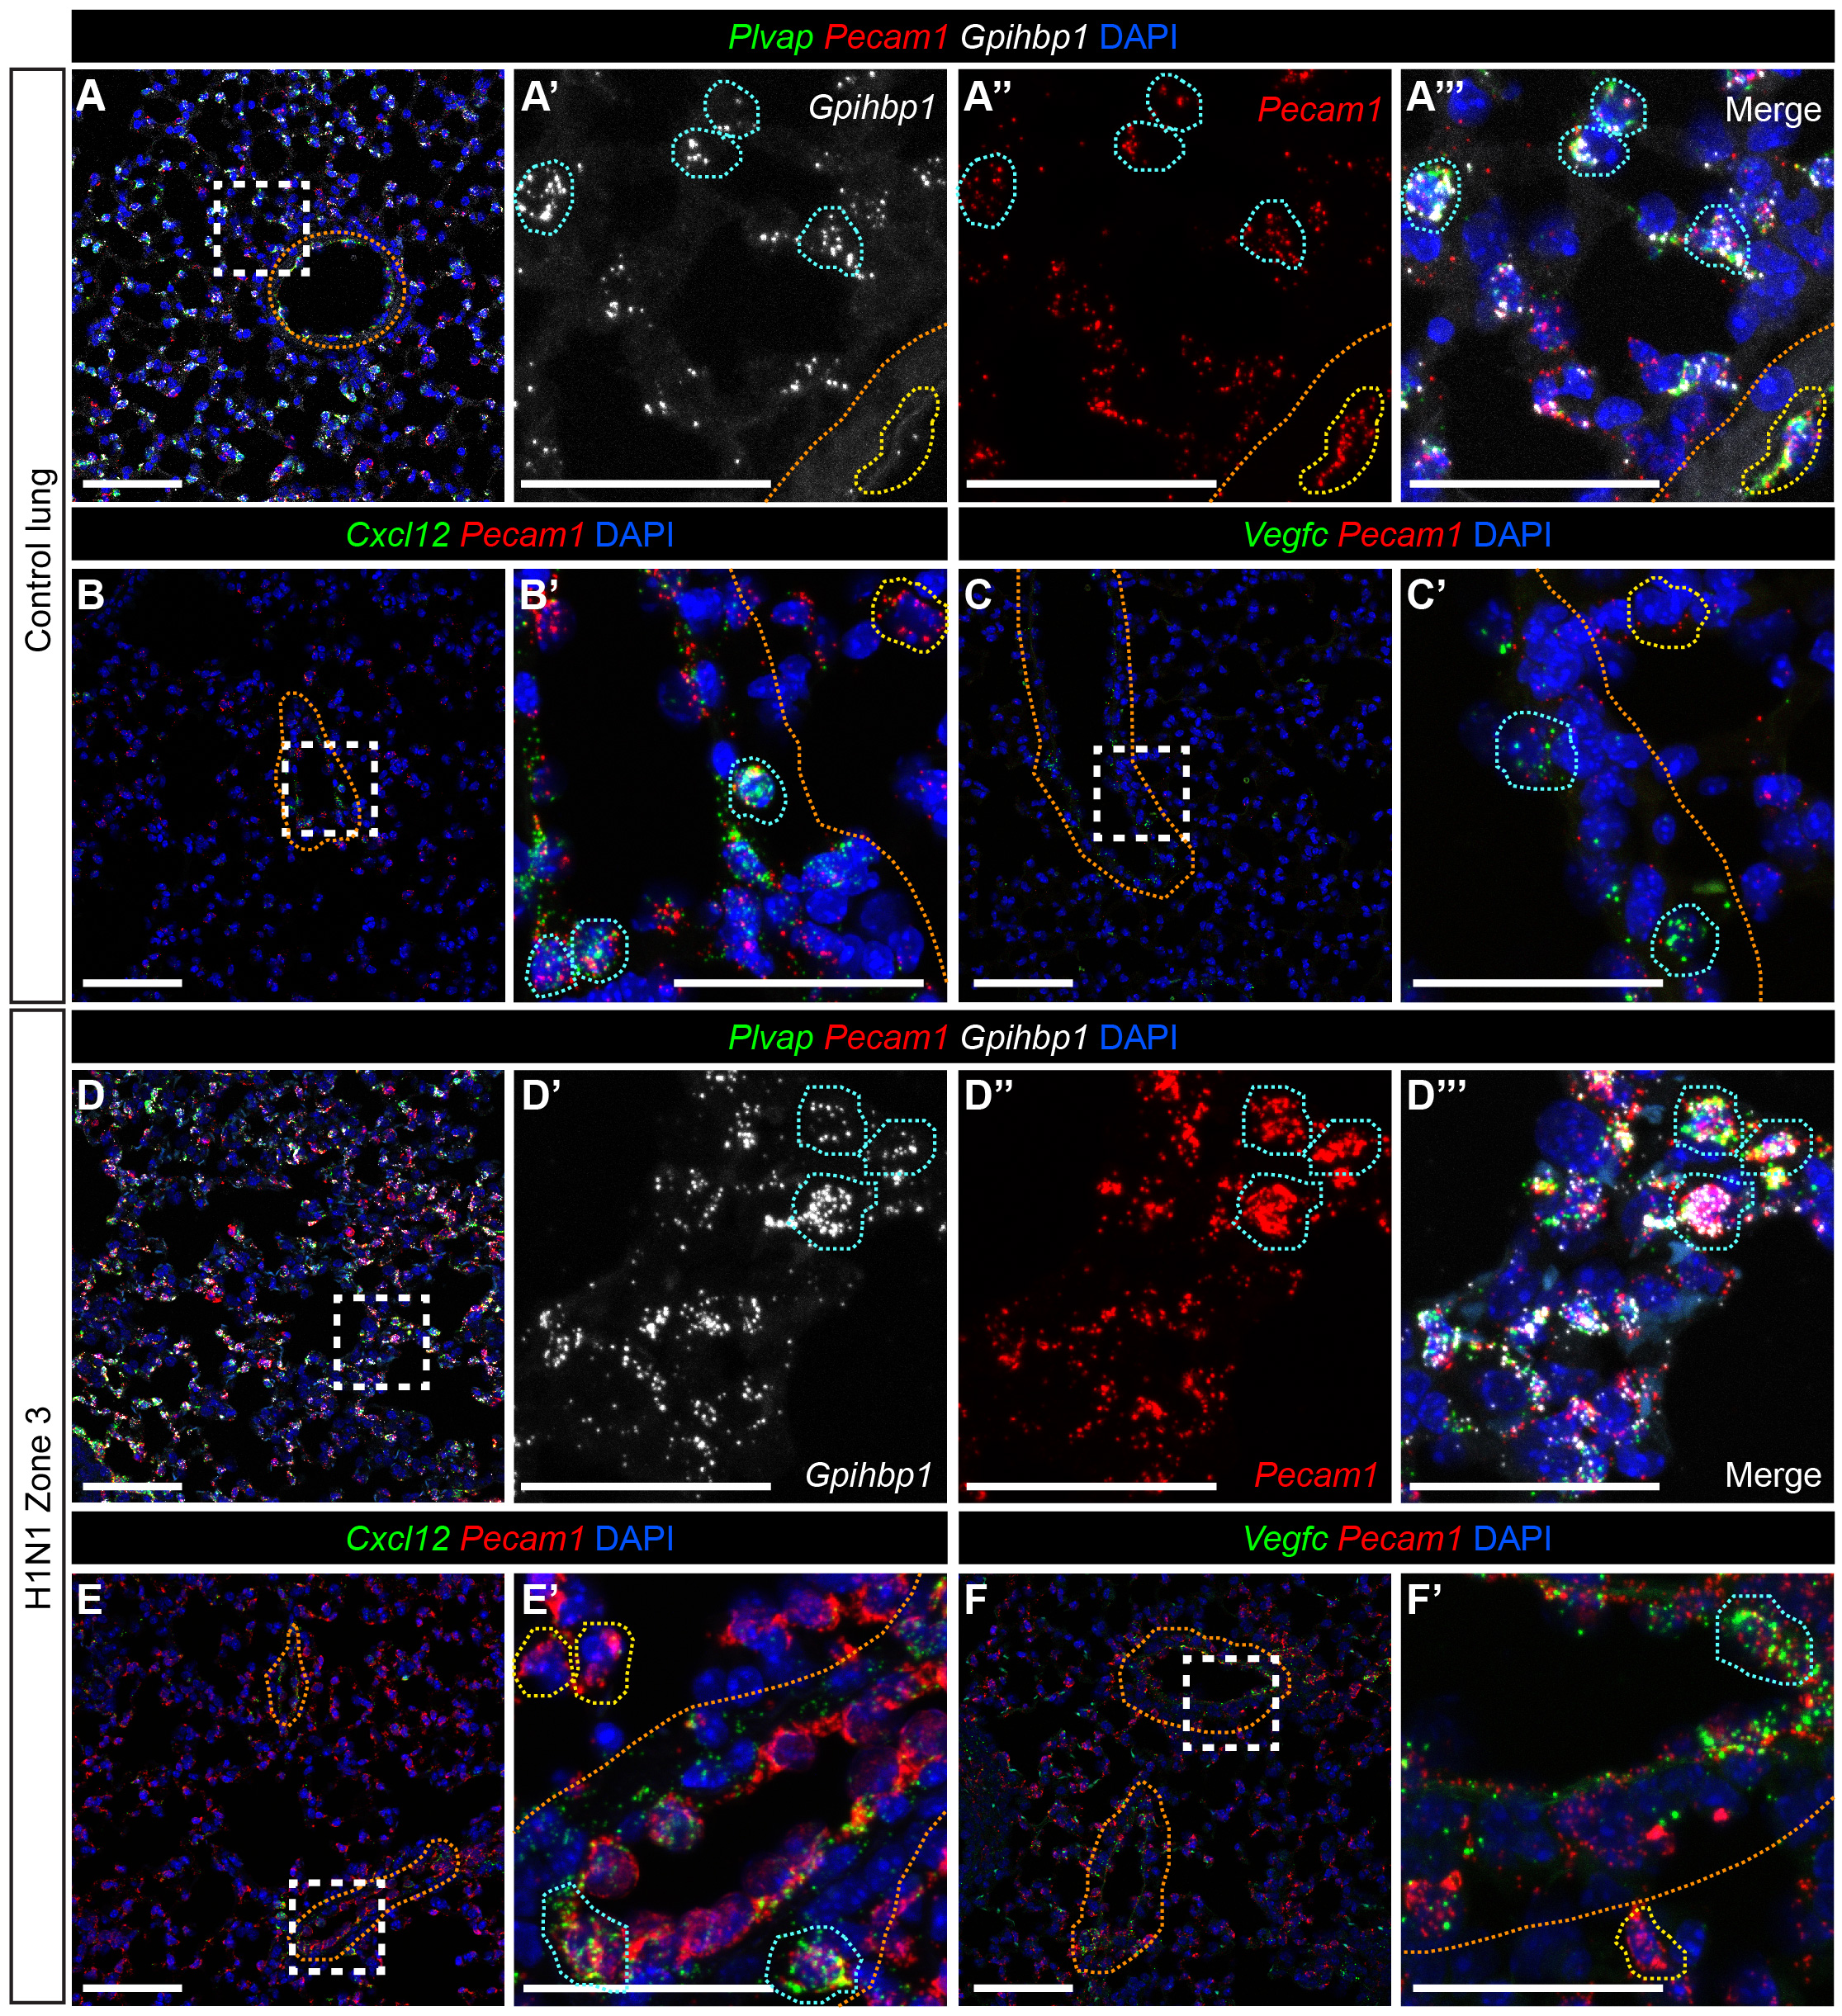

Supplement: supp [file elife-53072-supp-v1.zip › elife_poa_e53072_Figure_3_figure_supplement_4.jpg]

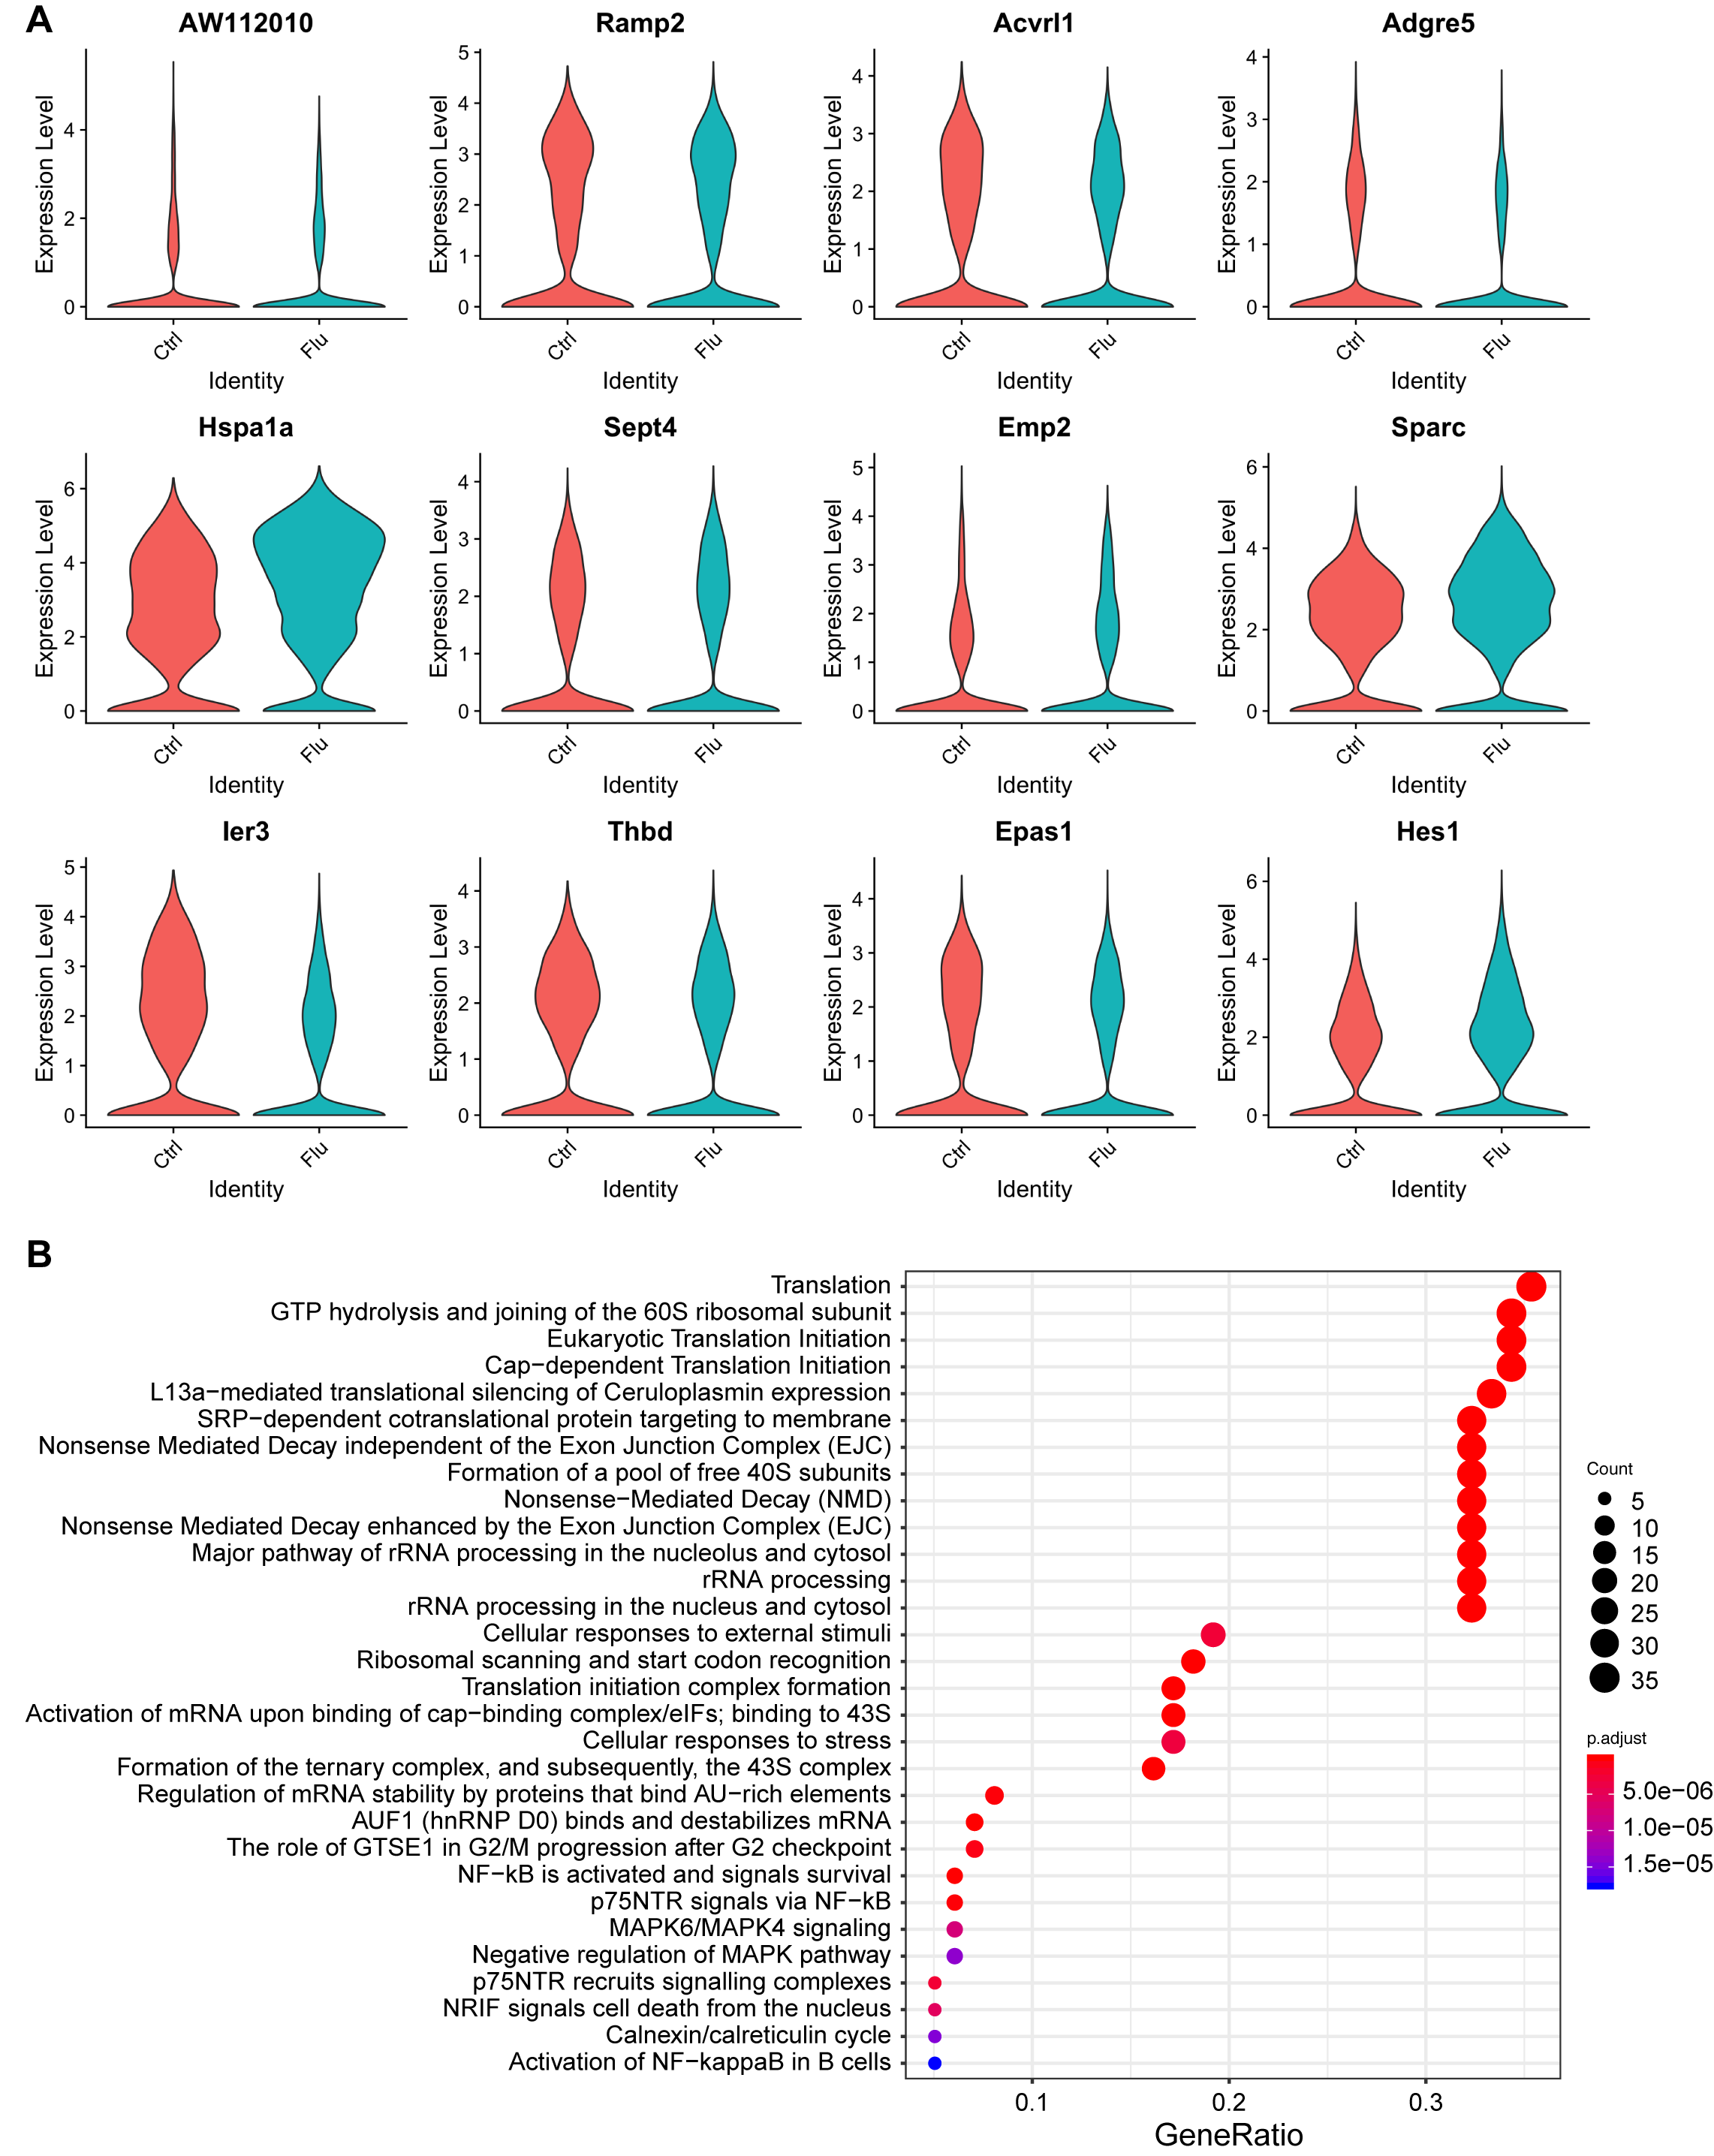

Supplement: supp [file elife-53072-supp-v1.zip › elife_poa_e53072_Figure_4_figure_supplement_6.tif]

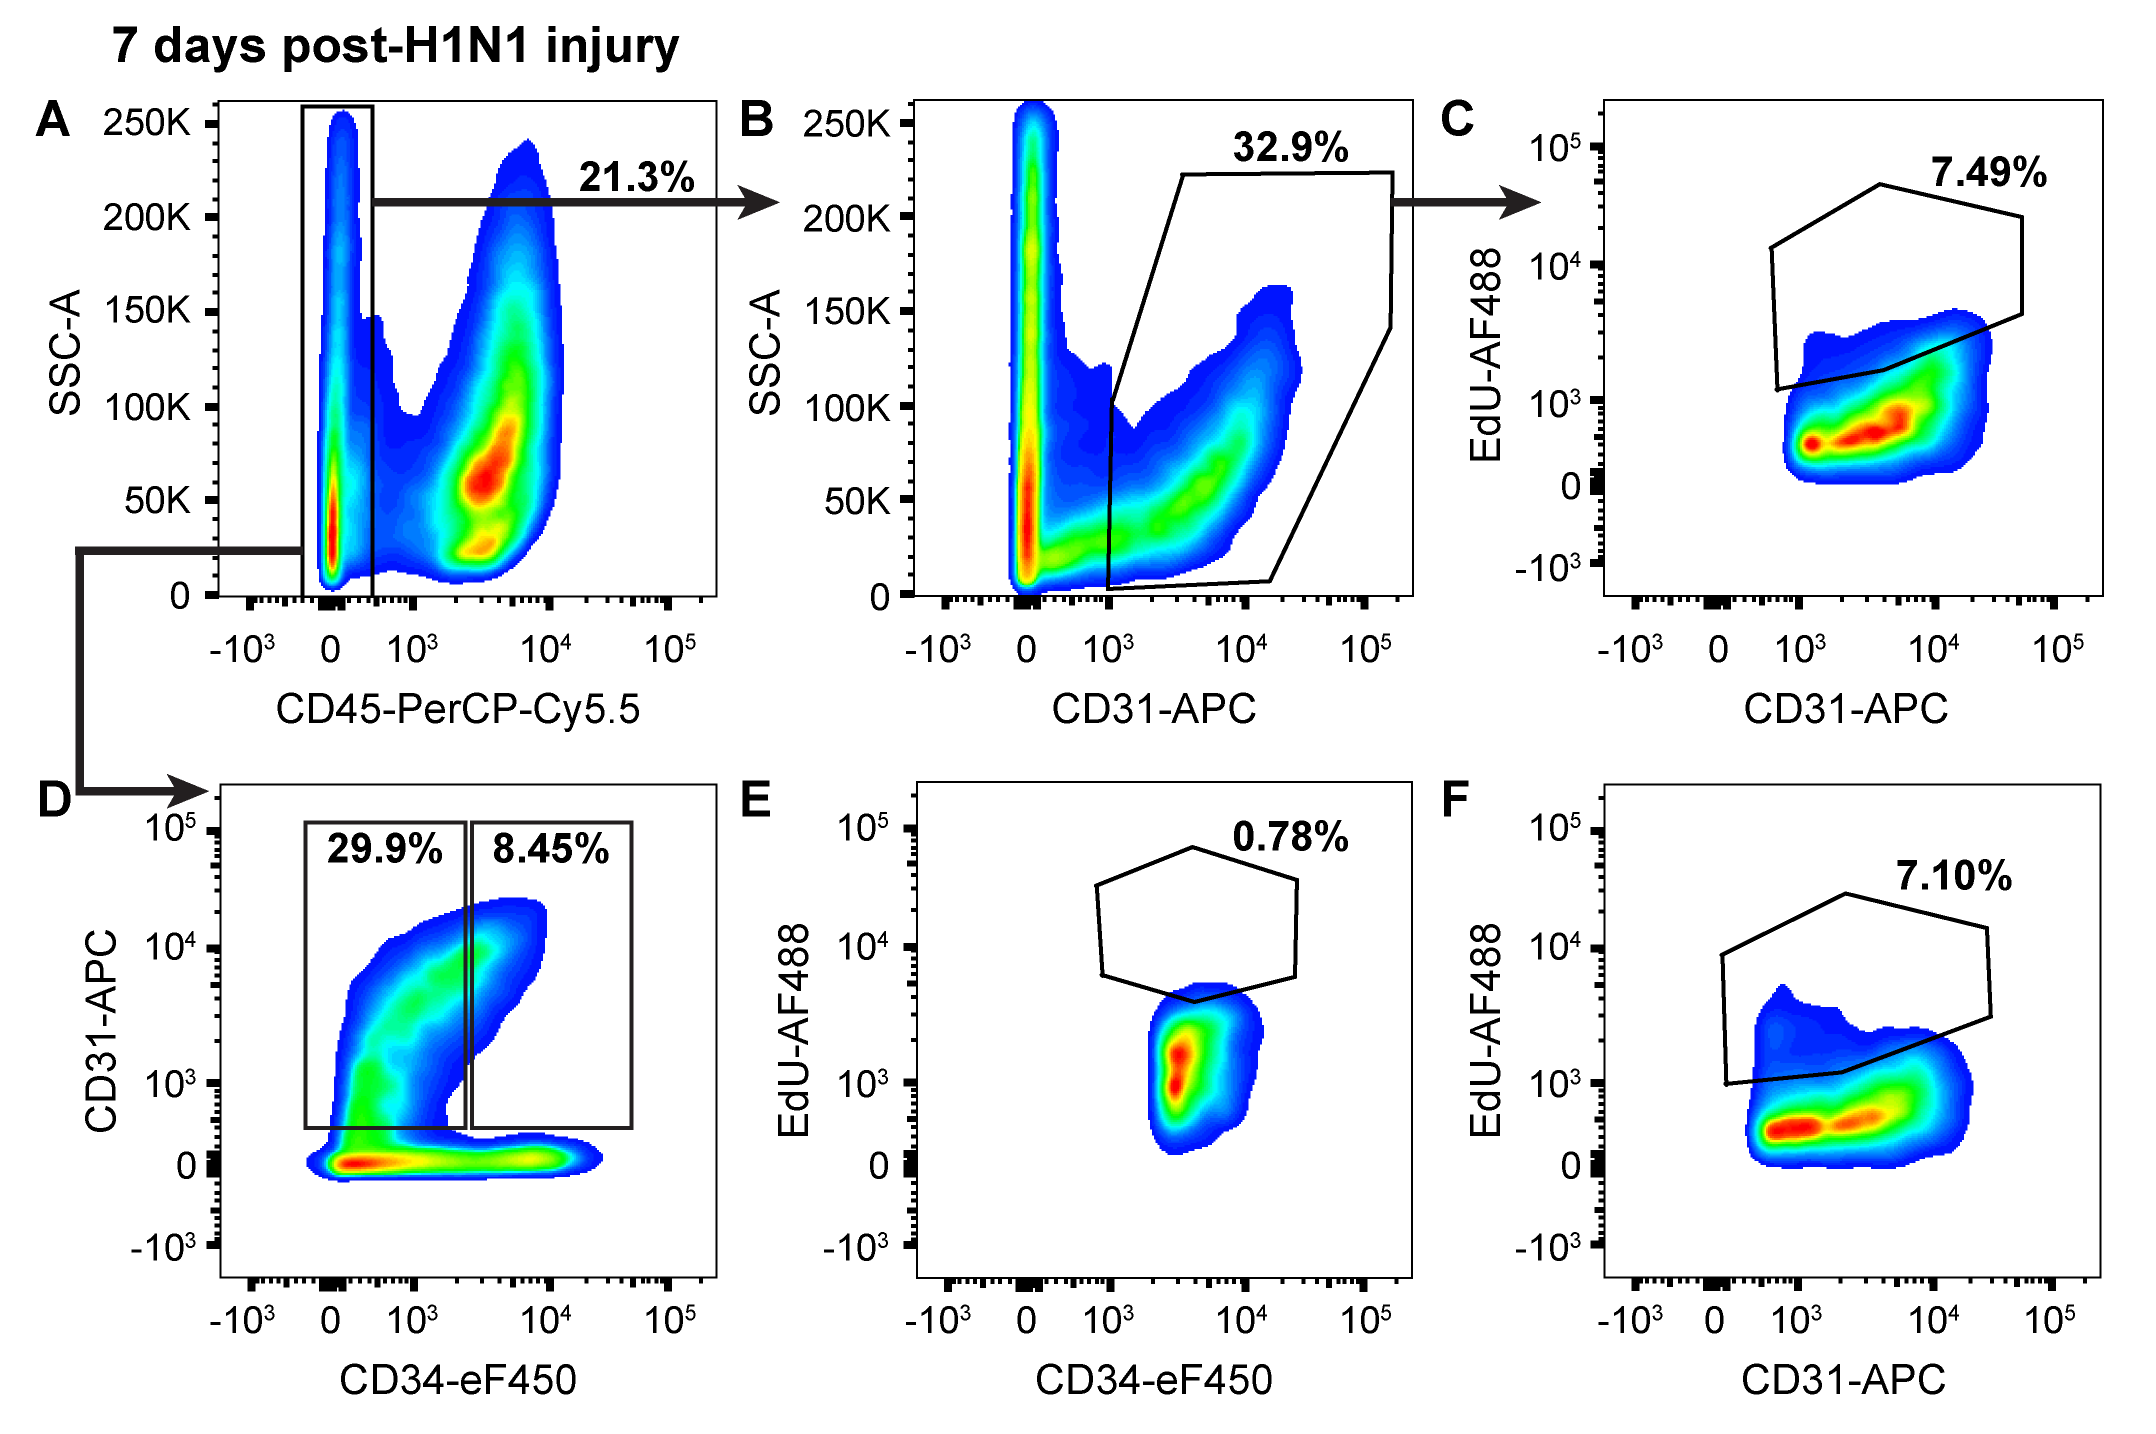

Supplement: supp [file elife-53072-supp-v1.zip › elife_poa_e53072_Figure_5_figure_supplement_3.tif]

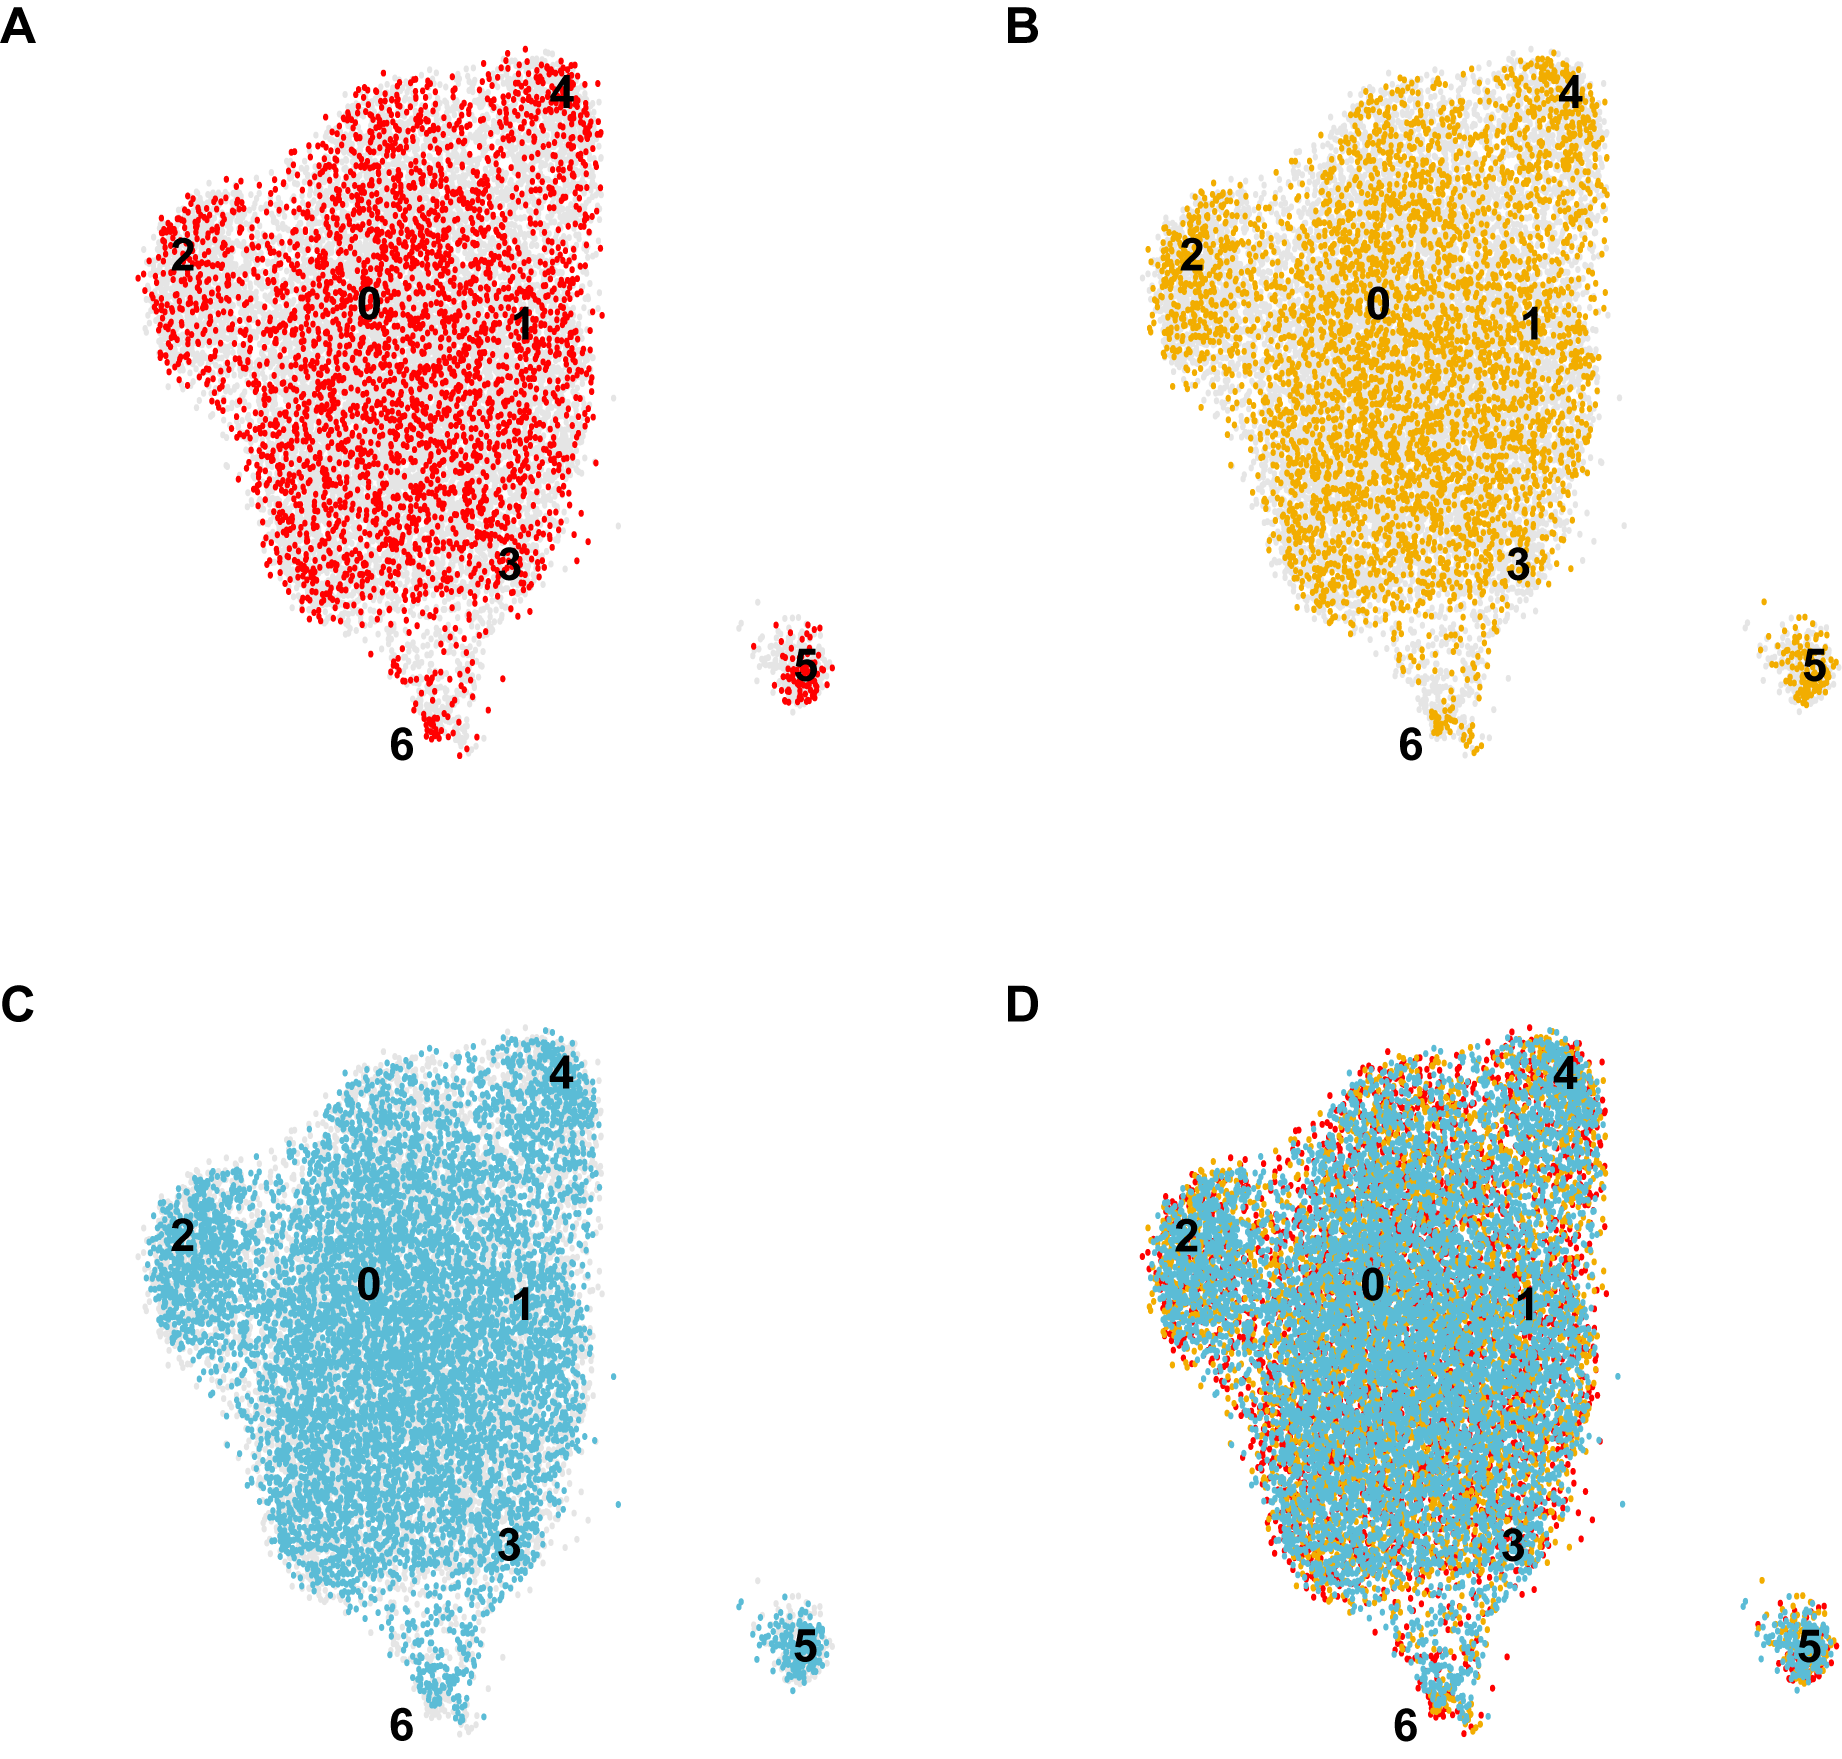

Supplement: supp [file elife-53072-supp-v1.zip › elife_poa_e53072_Figure_1_figure_supplement_2.tif]

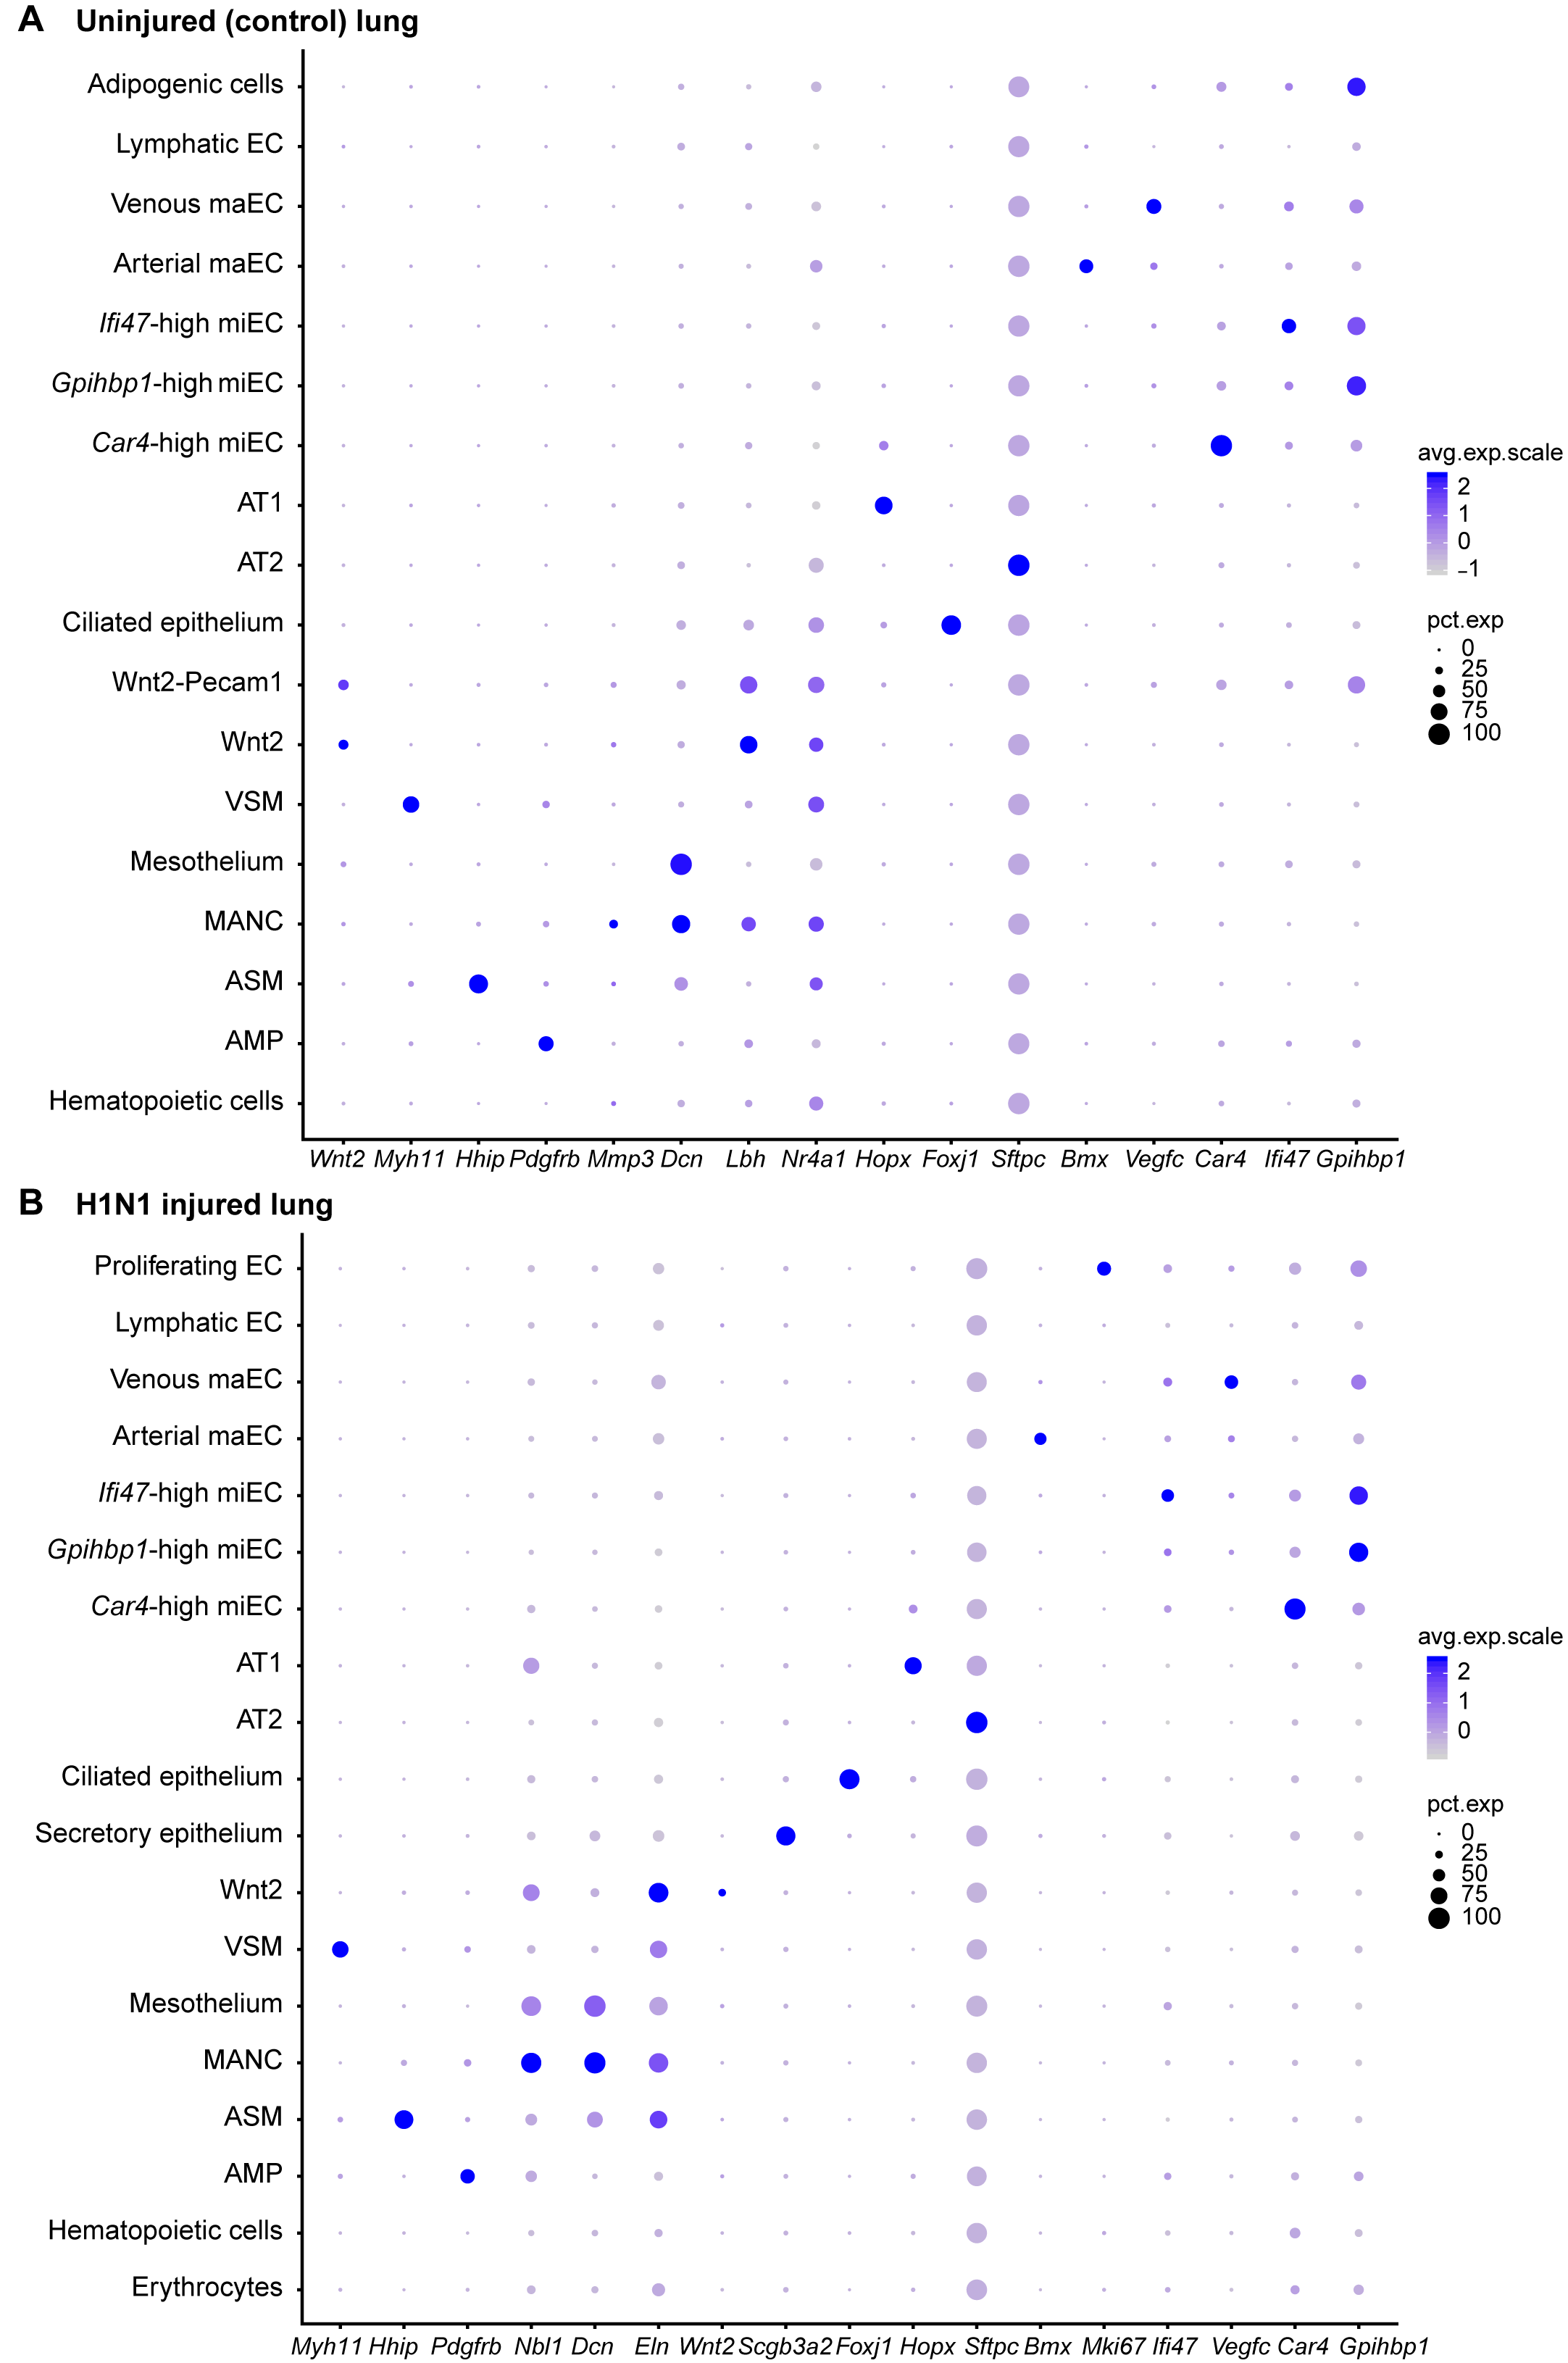

Supplement: supp [file elife-53072-supp-v1.zip › elife_poa_e53072_Figure_4_figure_supplement_3.tif]

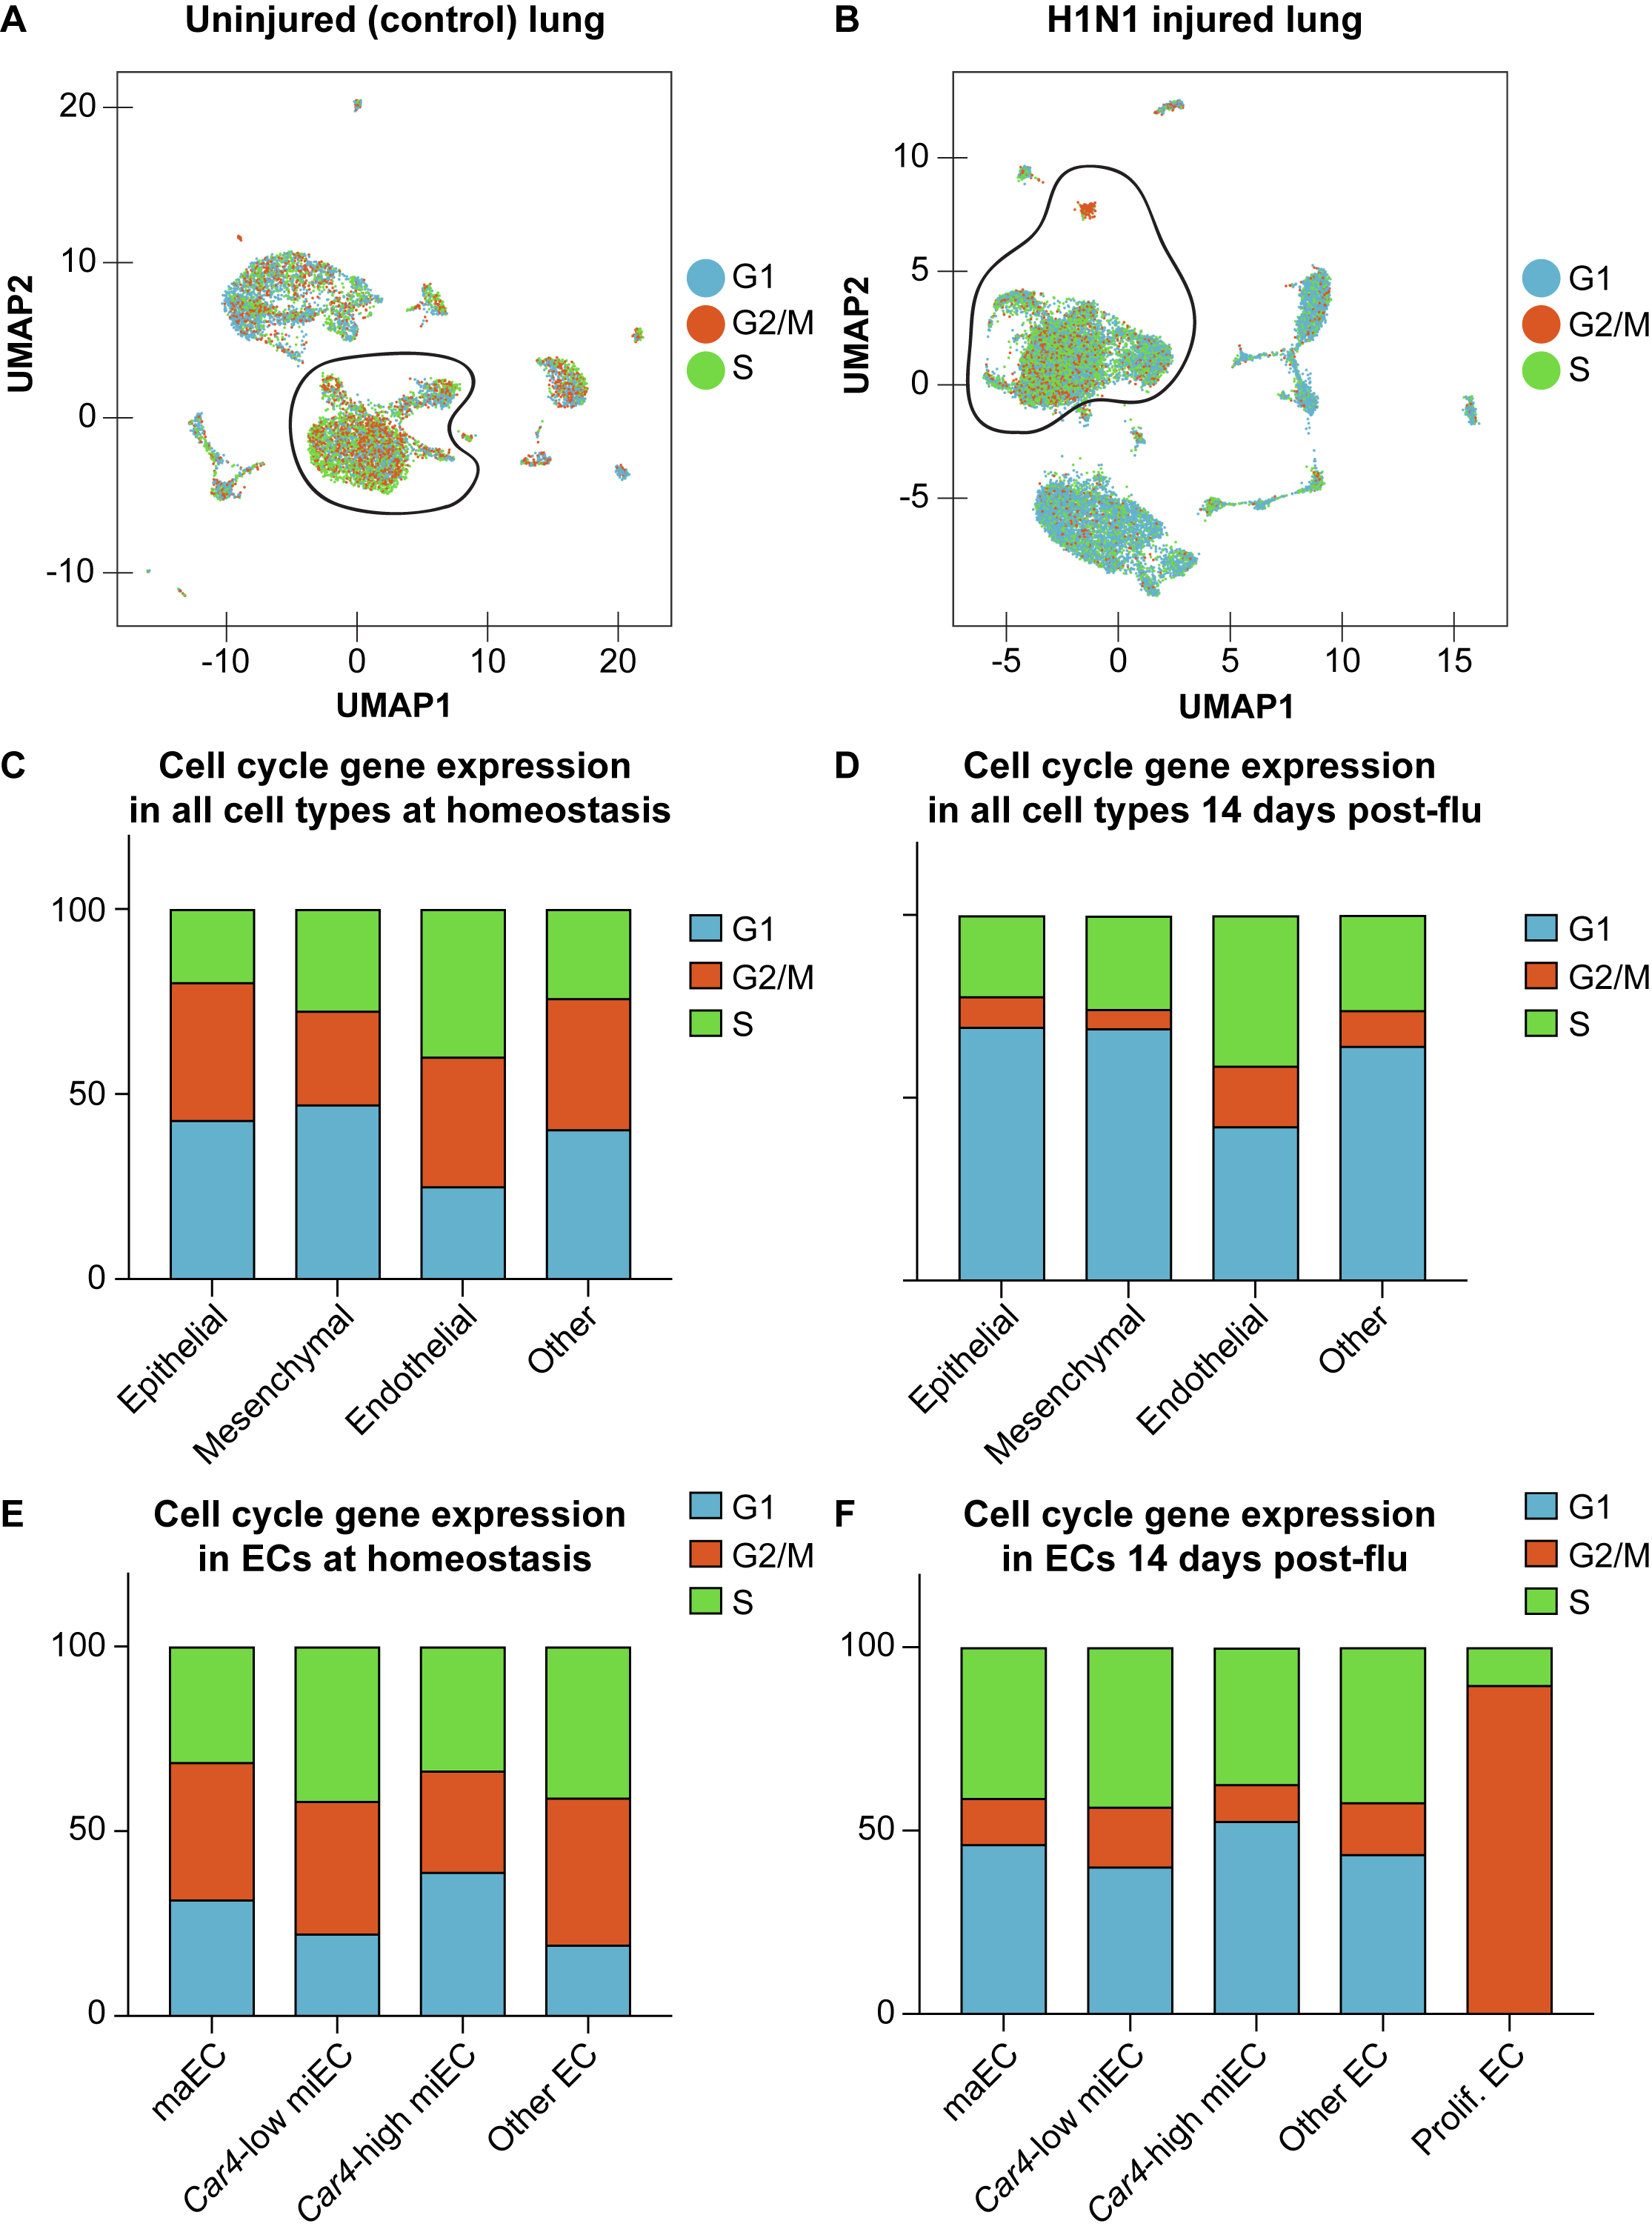

Supplement: supp [file elife-53072-supp-v1.zip › elife_poa_e53072_Figure_5_figure_supplement_6.tif]

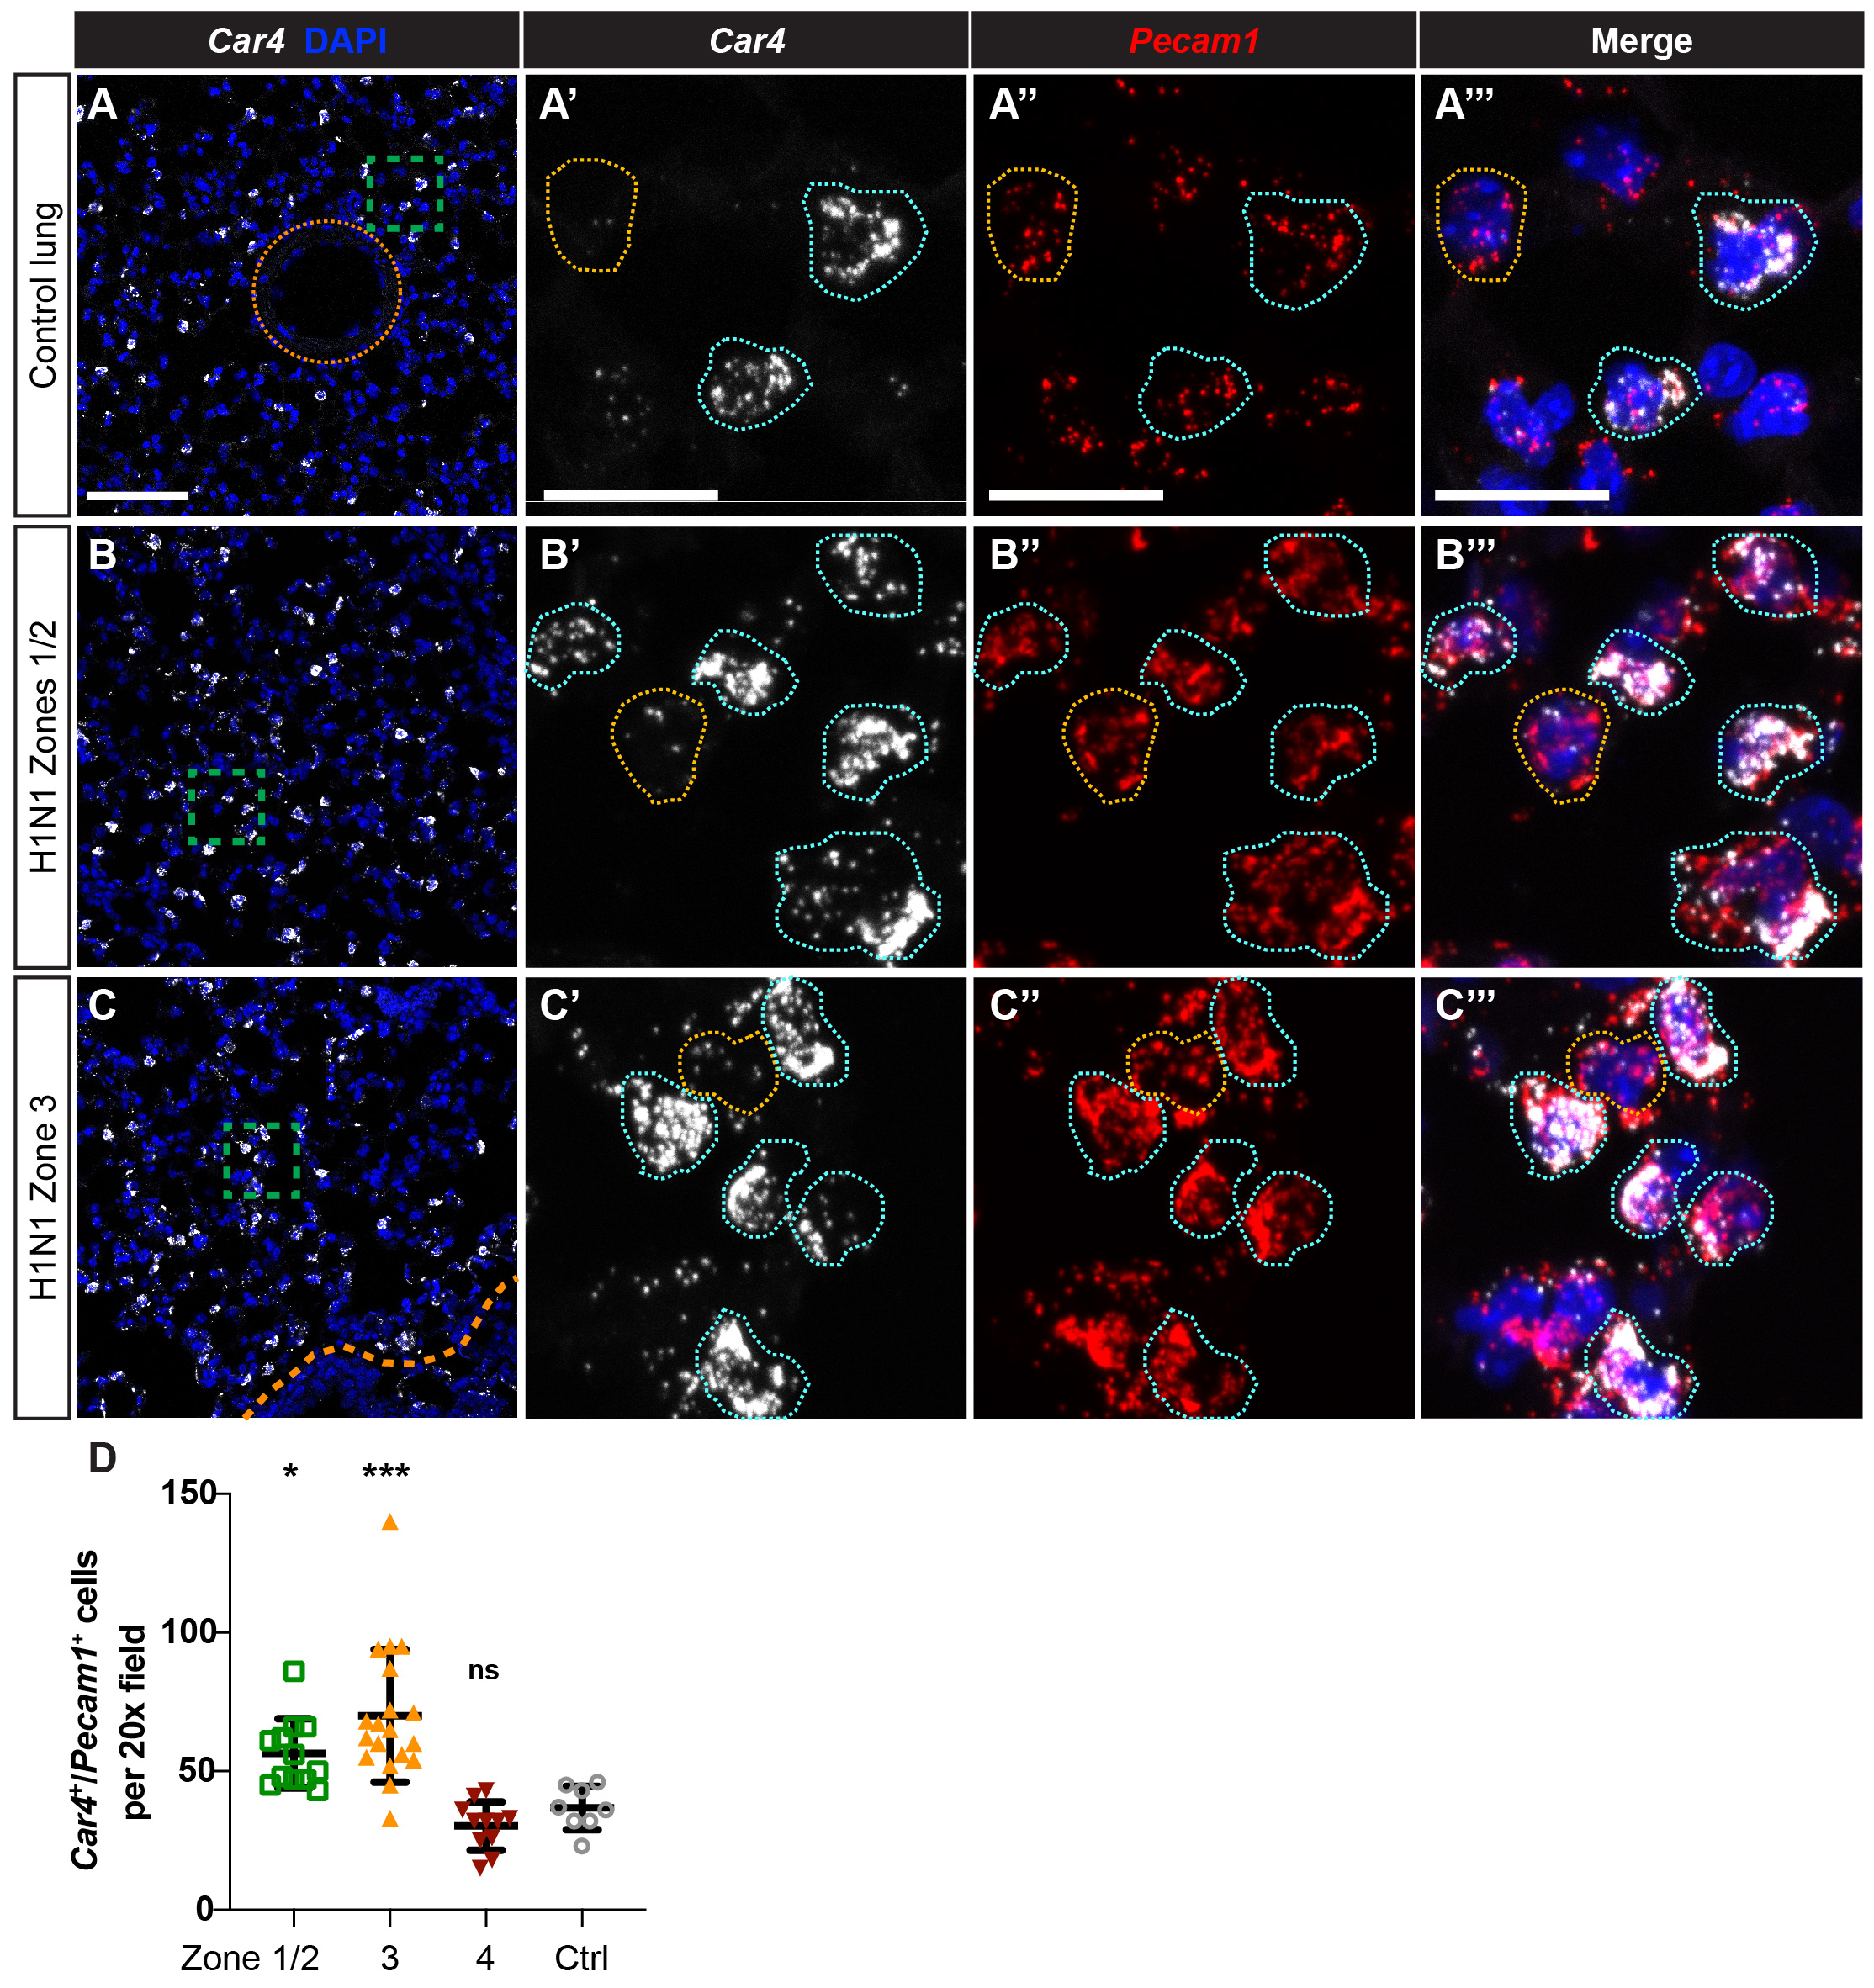

Supplement: supp [file elife-53072-supp-v1.zip › elife_poa_e53072_Figure_3_figure_supplement_2.jpg]

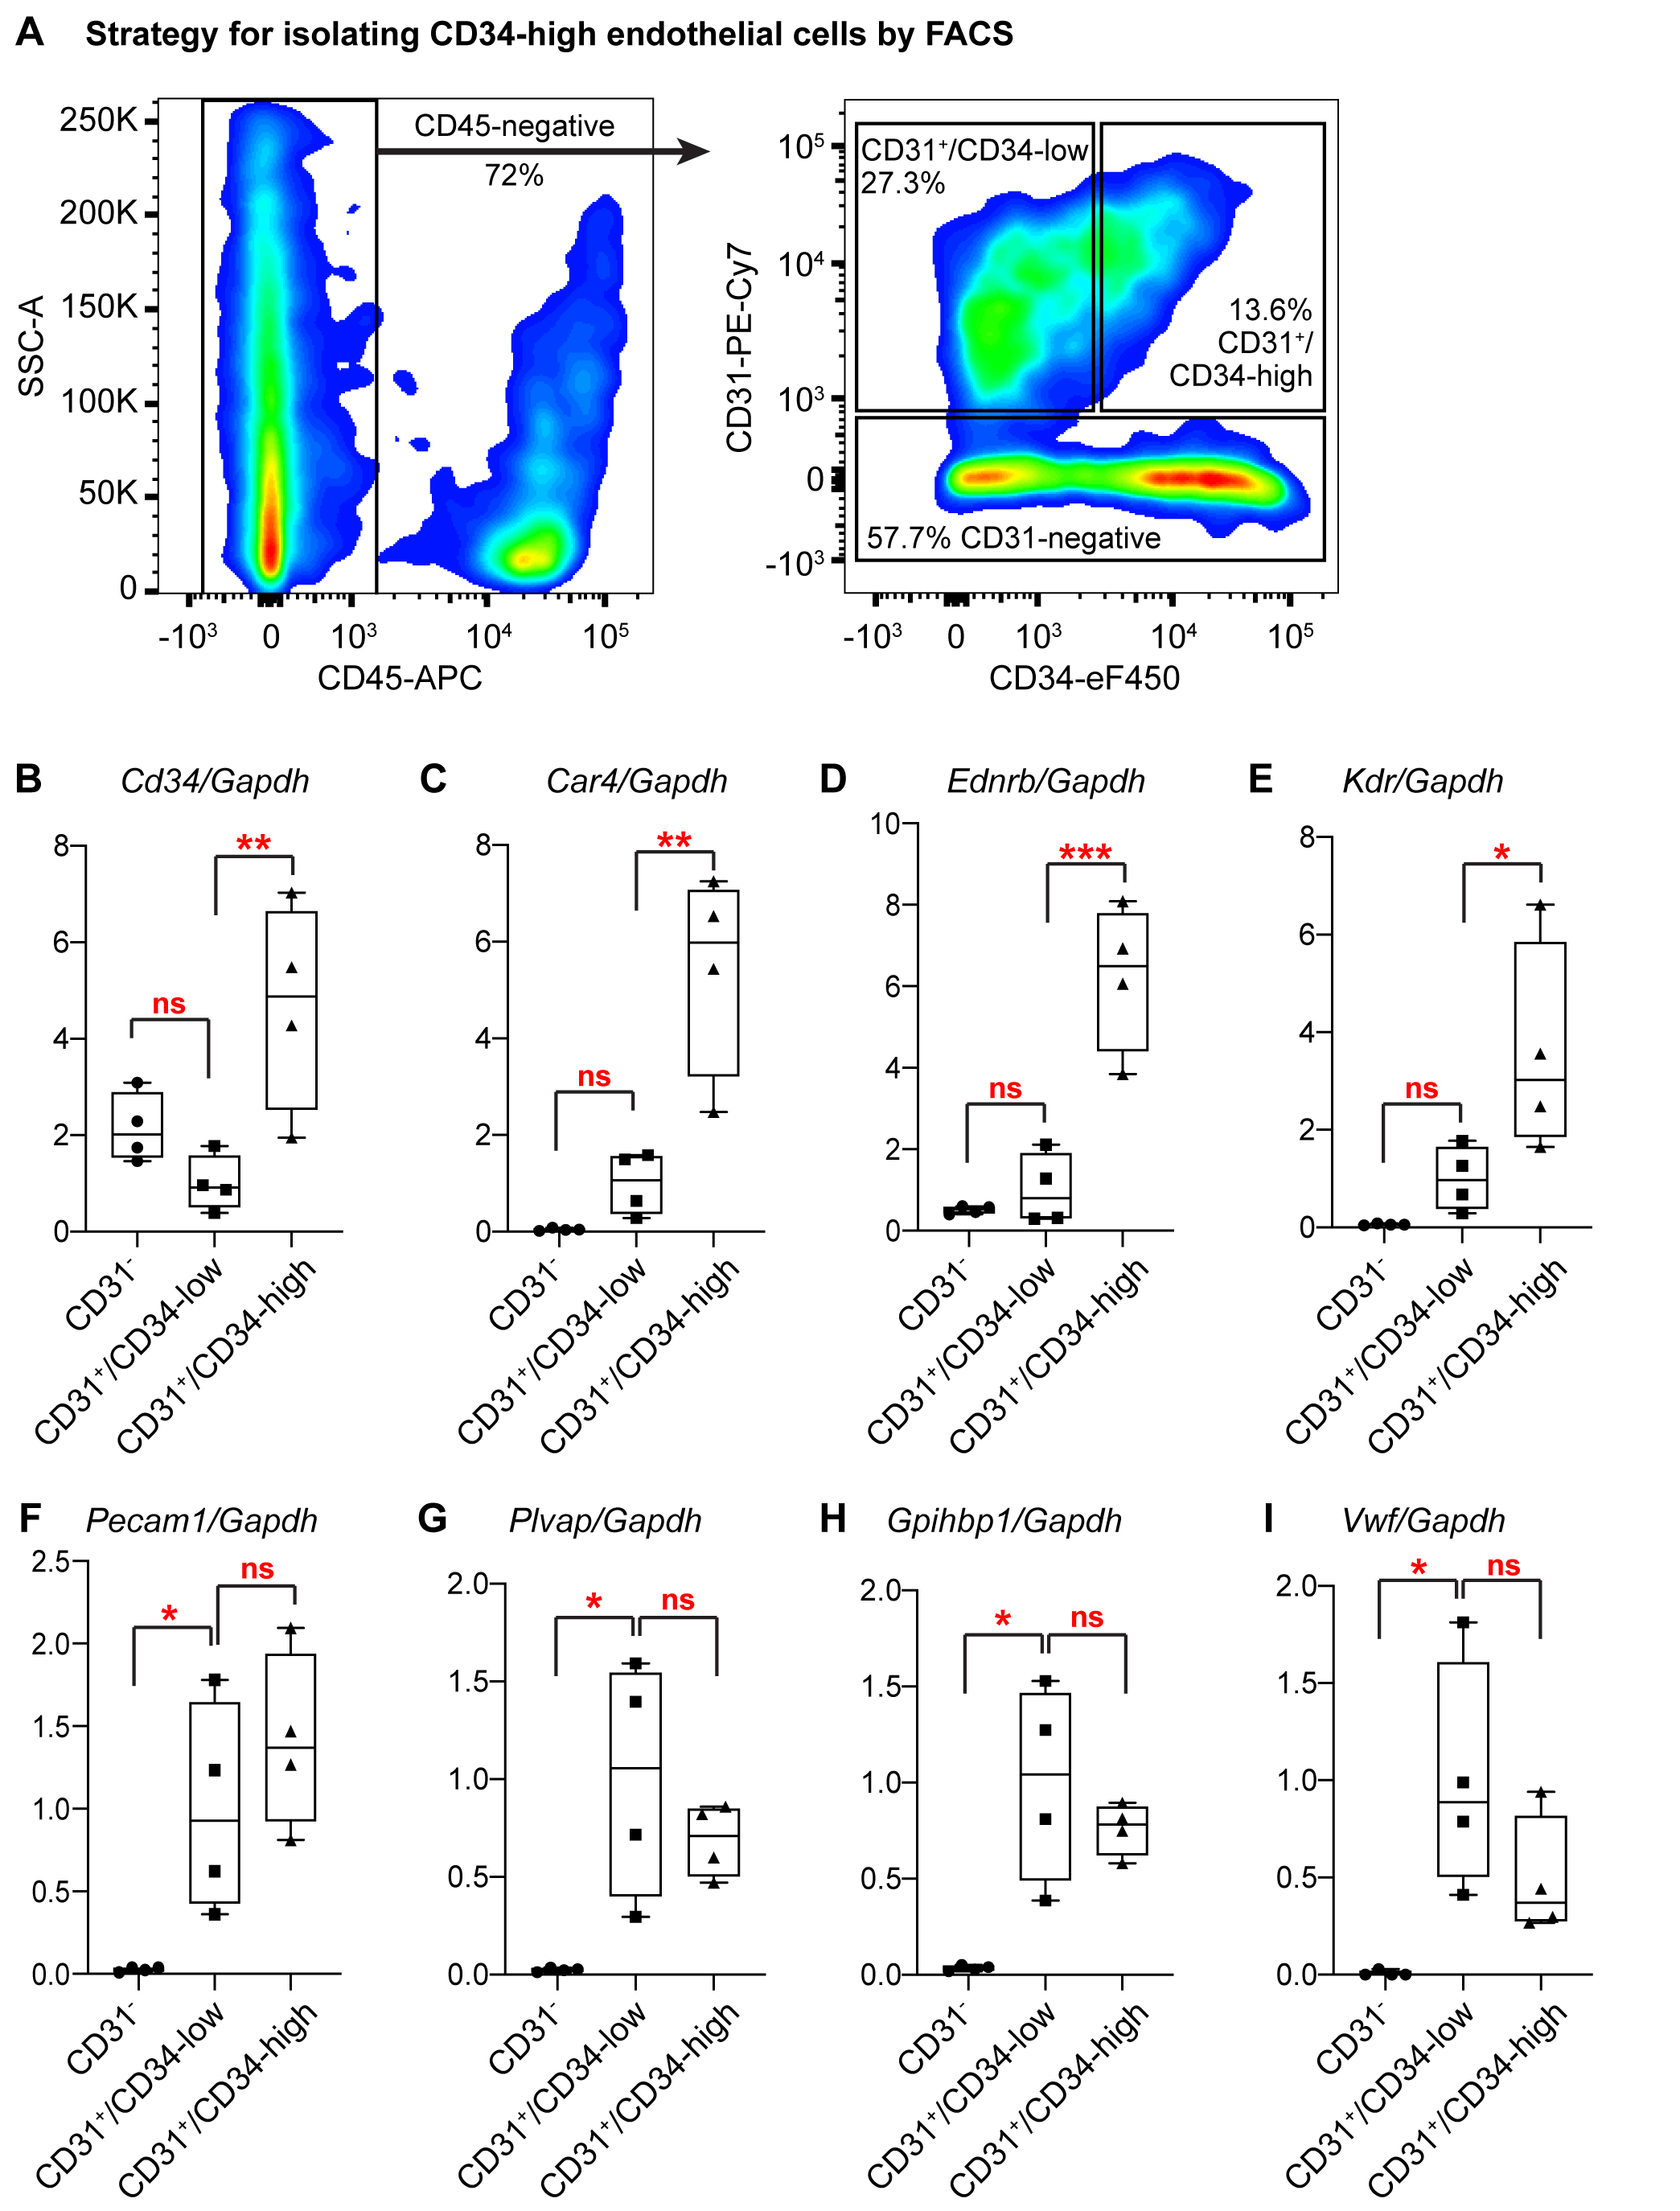

Supplement: supp [file elife-53072-supp-v1.zip › elife_poa_e53072_Figure_1_figure_supplement_3.tif]

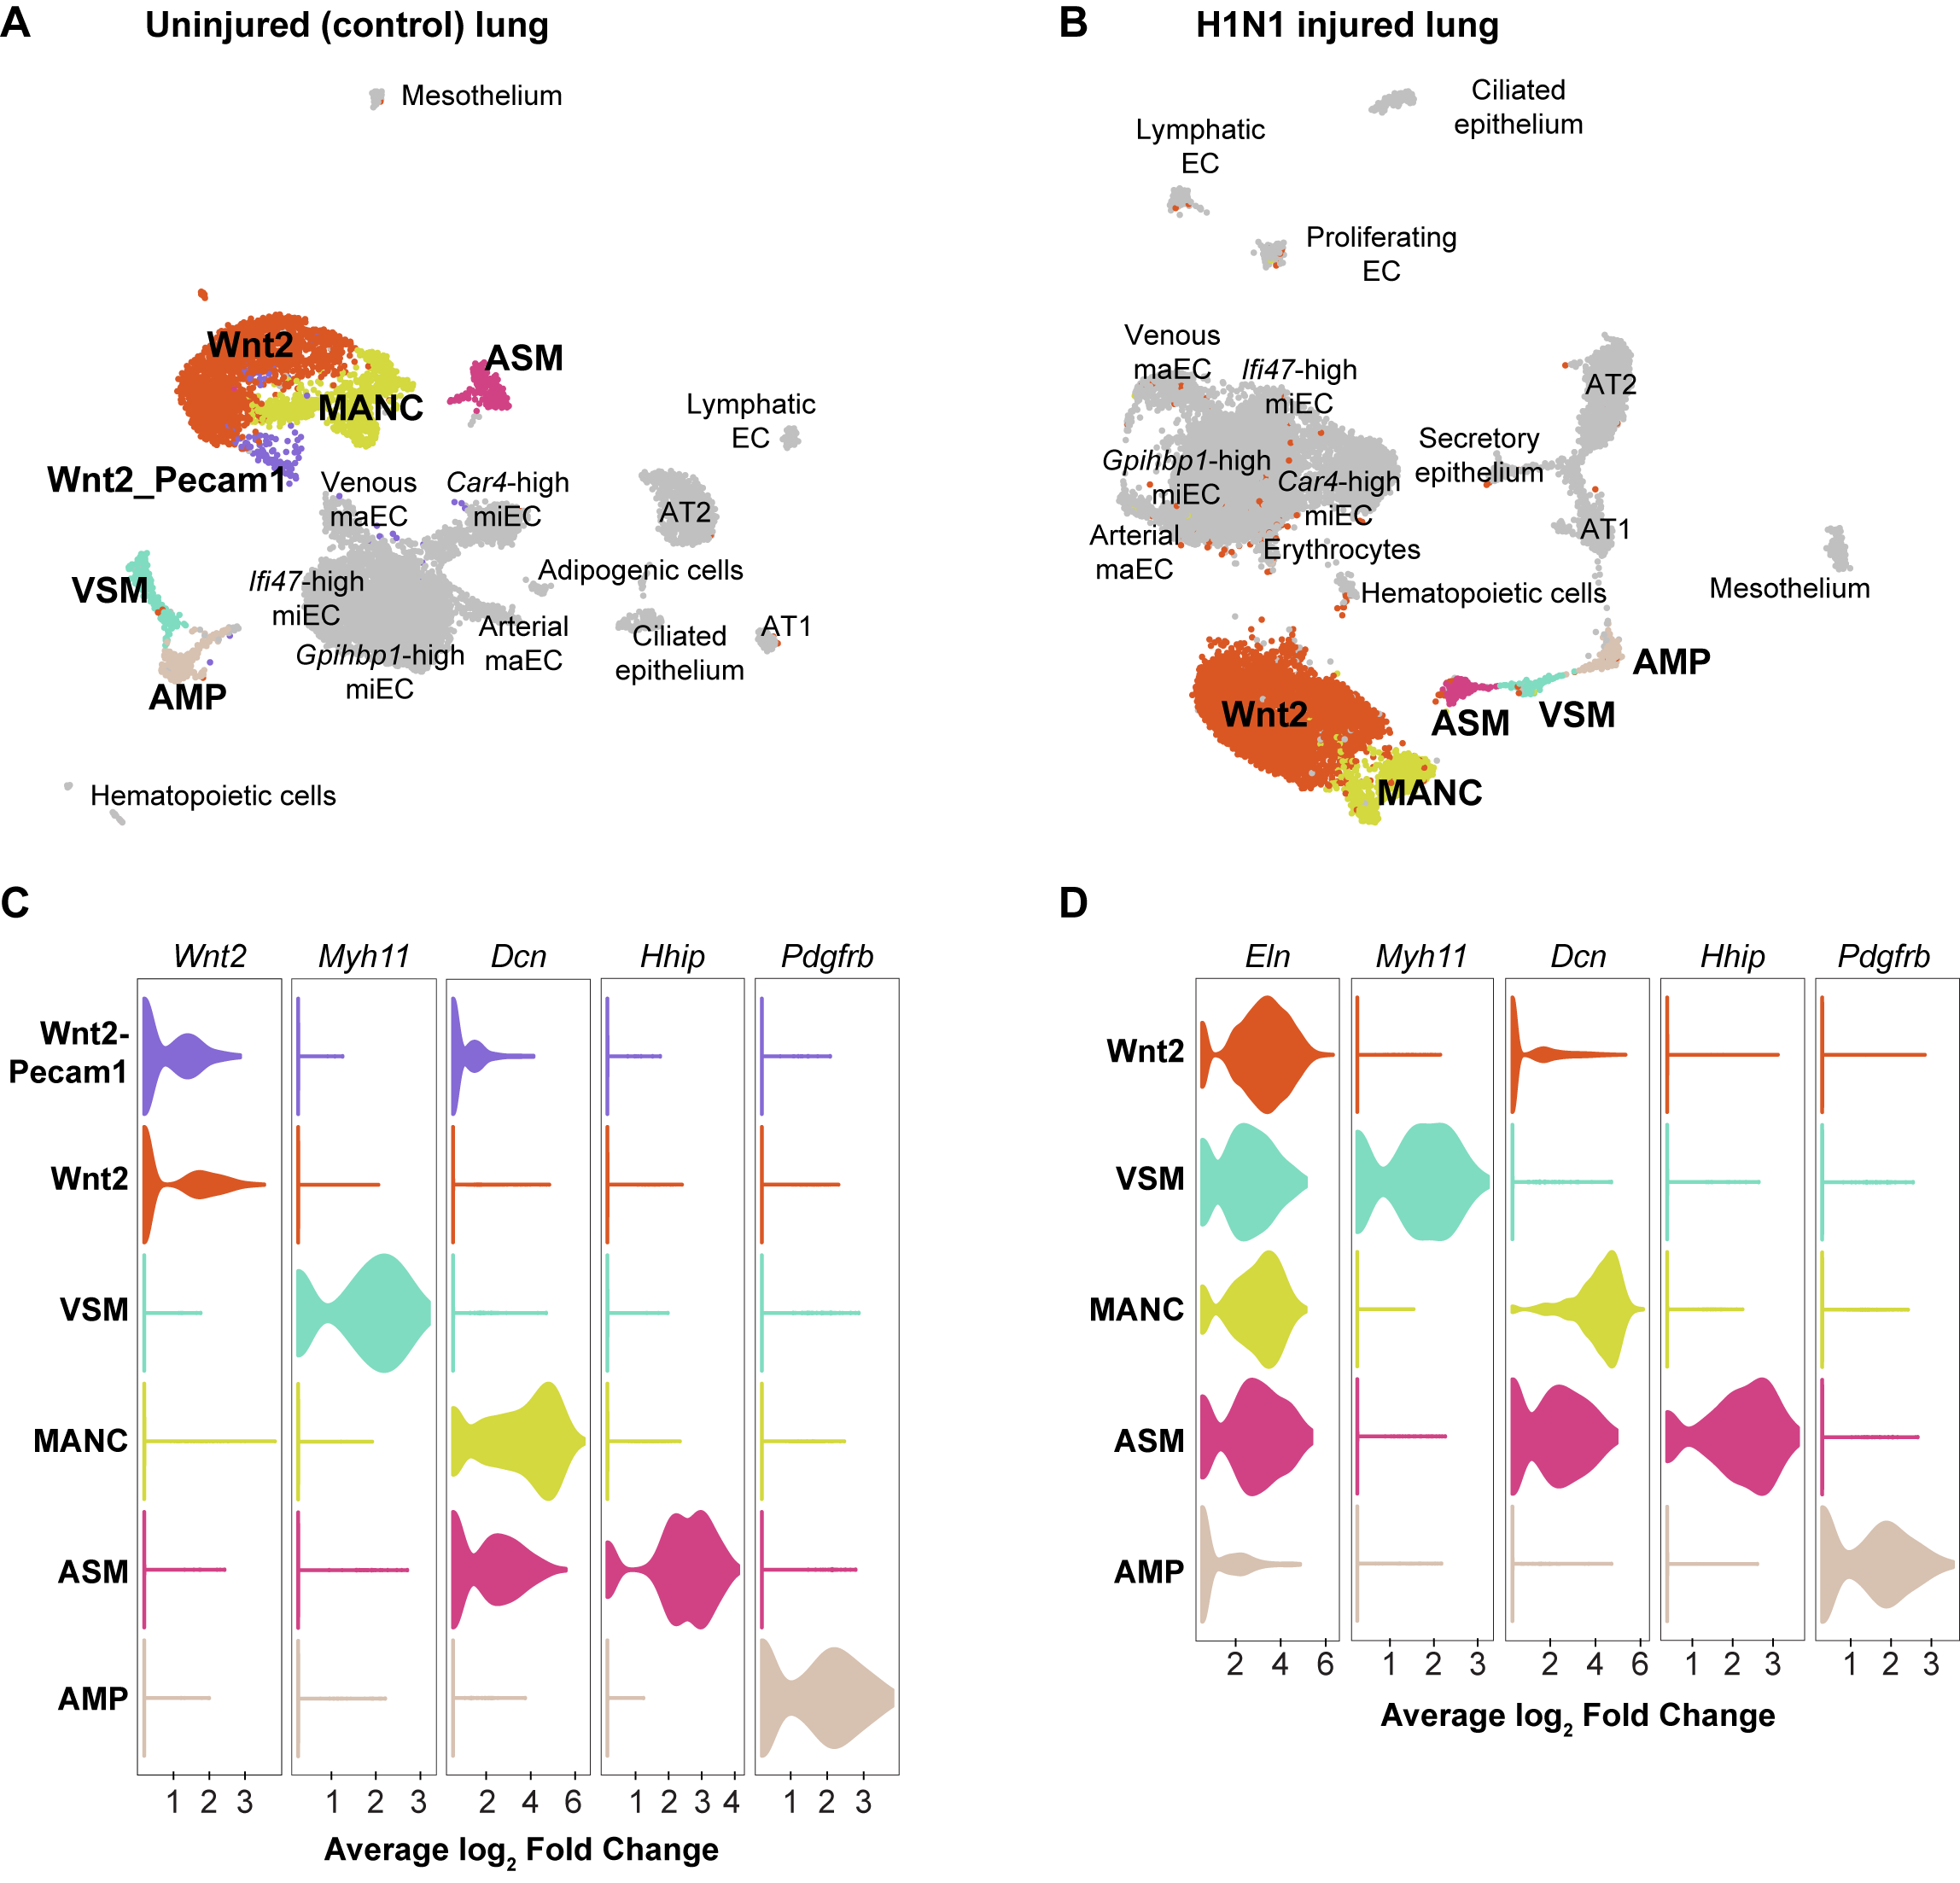

Supplement: supp [file elife-53072-supp-v1.zip › elife_poa_e53072_Figure_4_figure_supplement_2.tif]

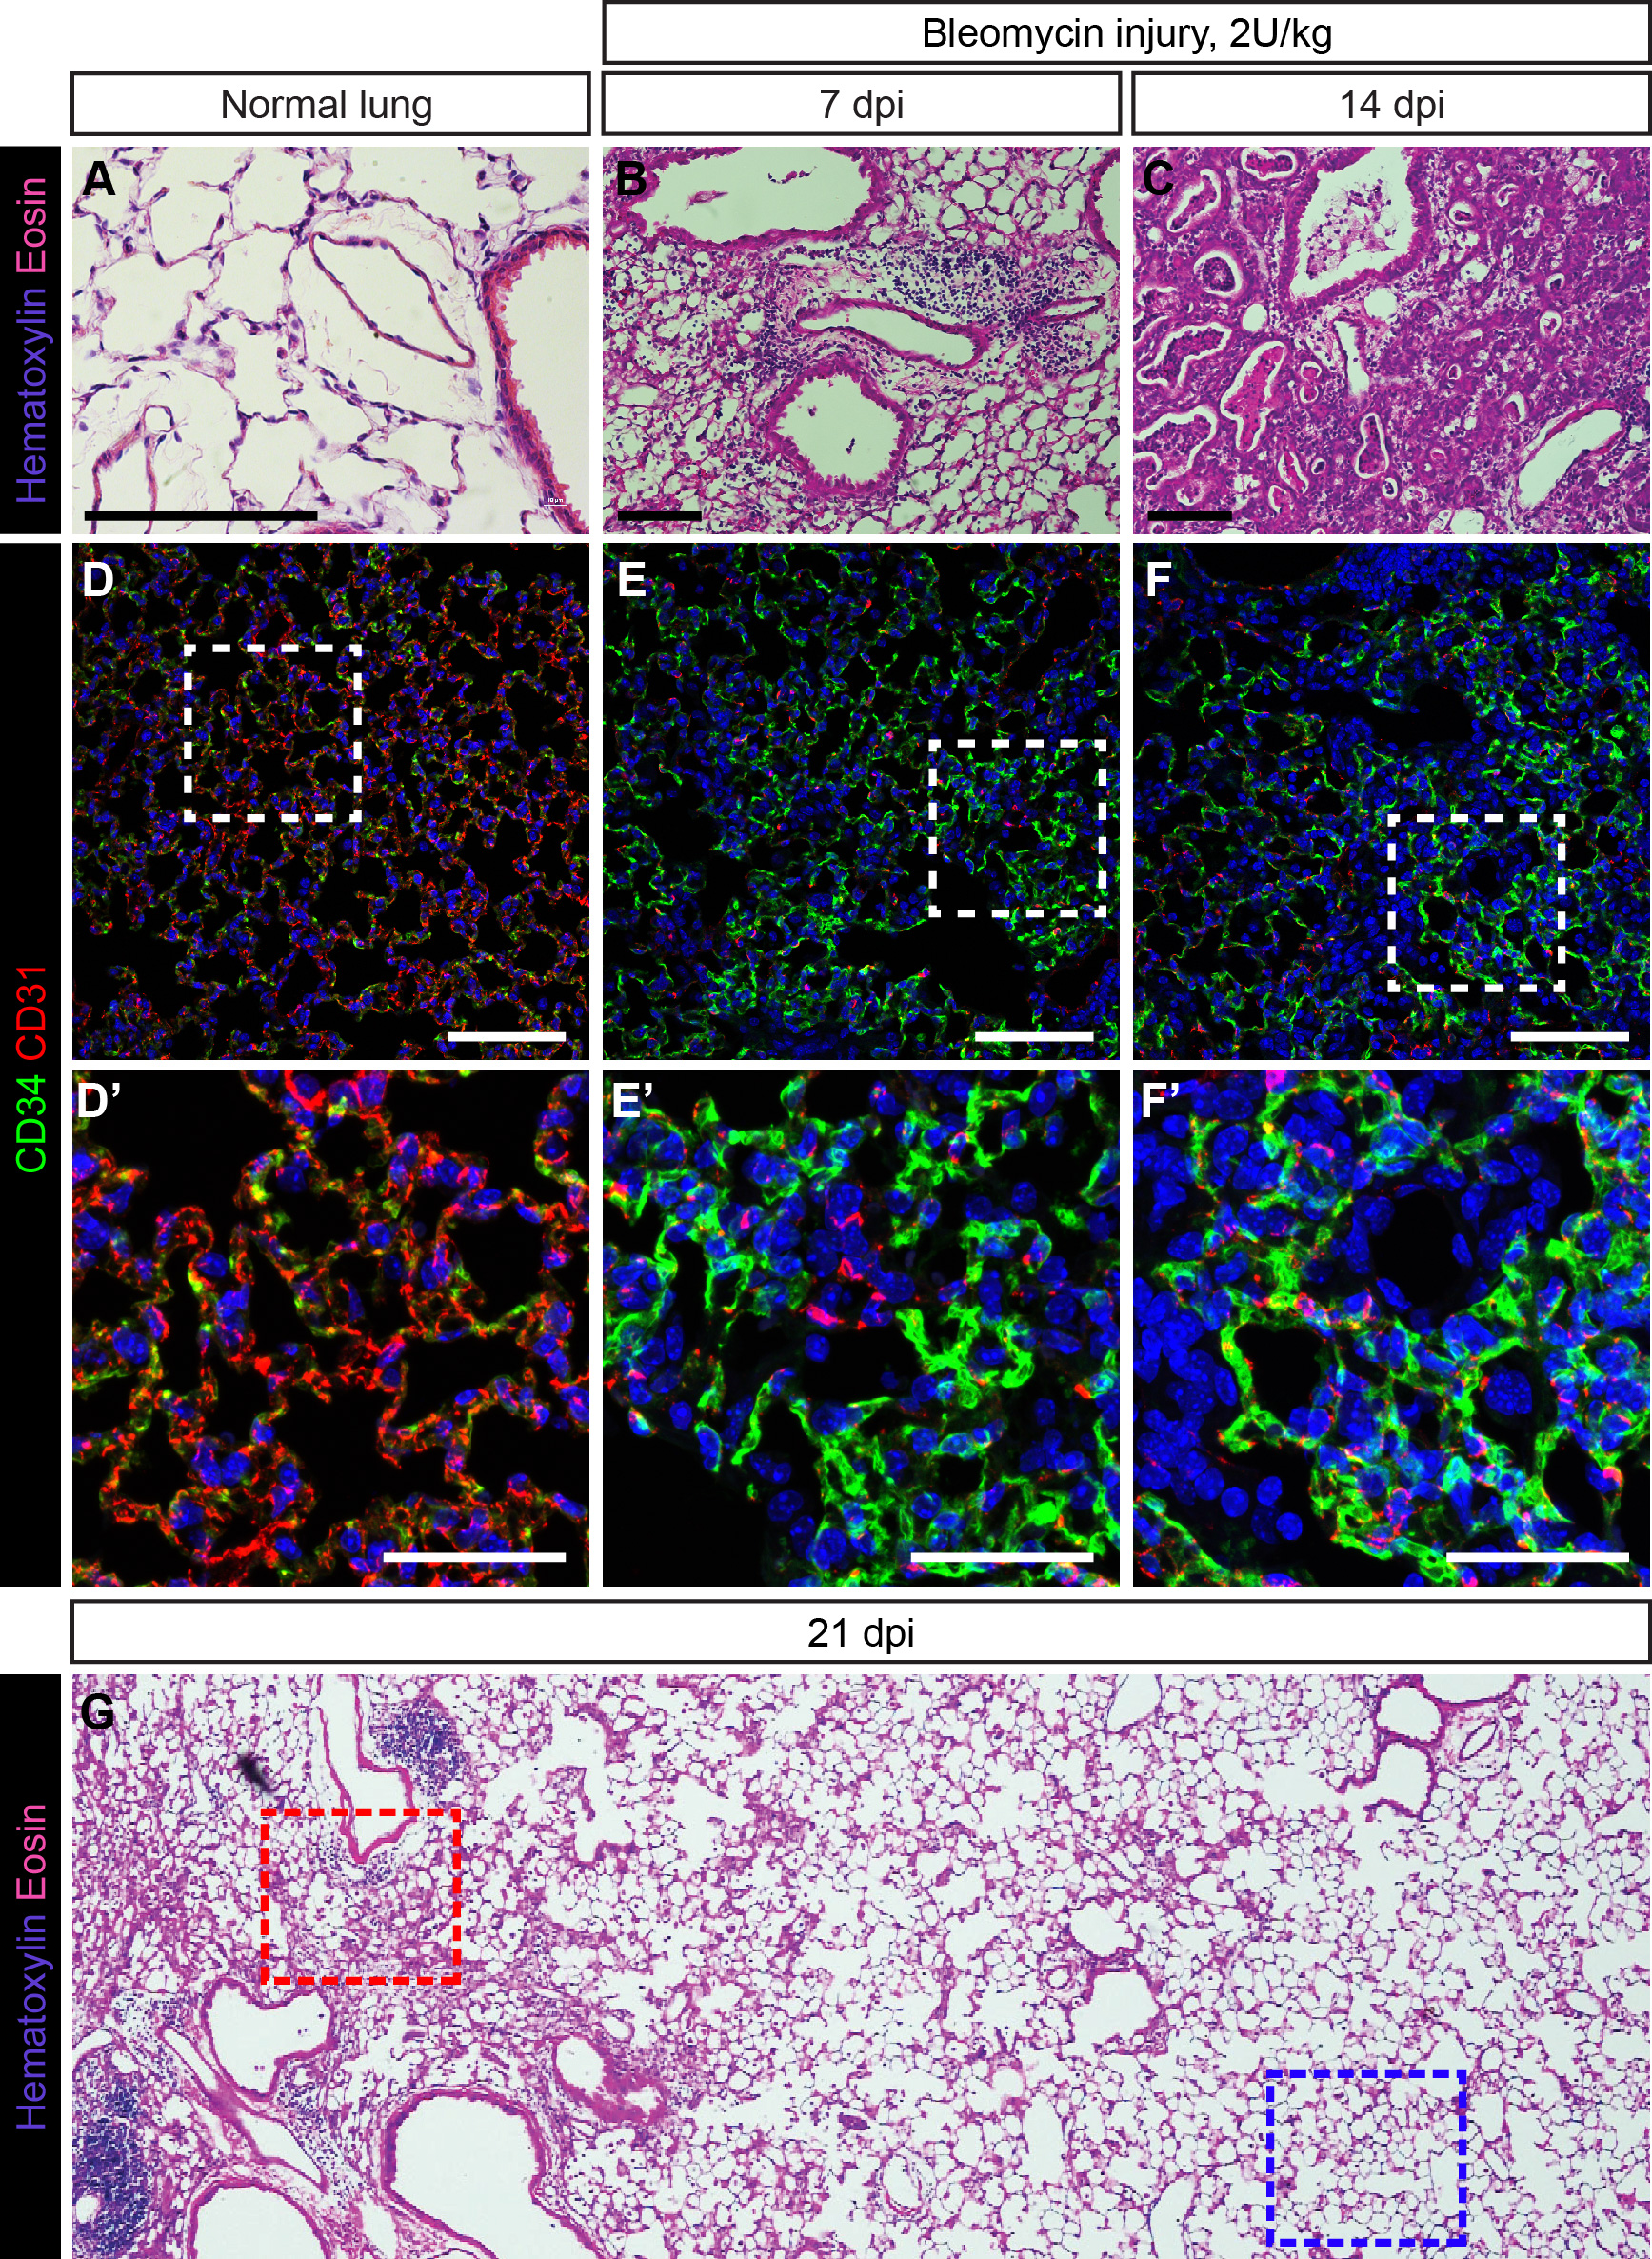

Supplement: supp [file elife-53072-supp-v1.zip › elife_poa_e53072_Figure_3_figure_supplement_1.jpg]

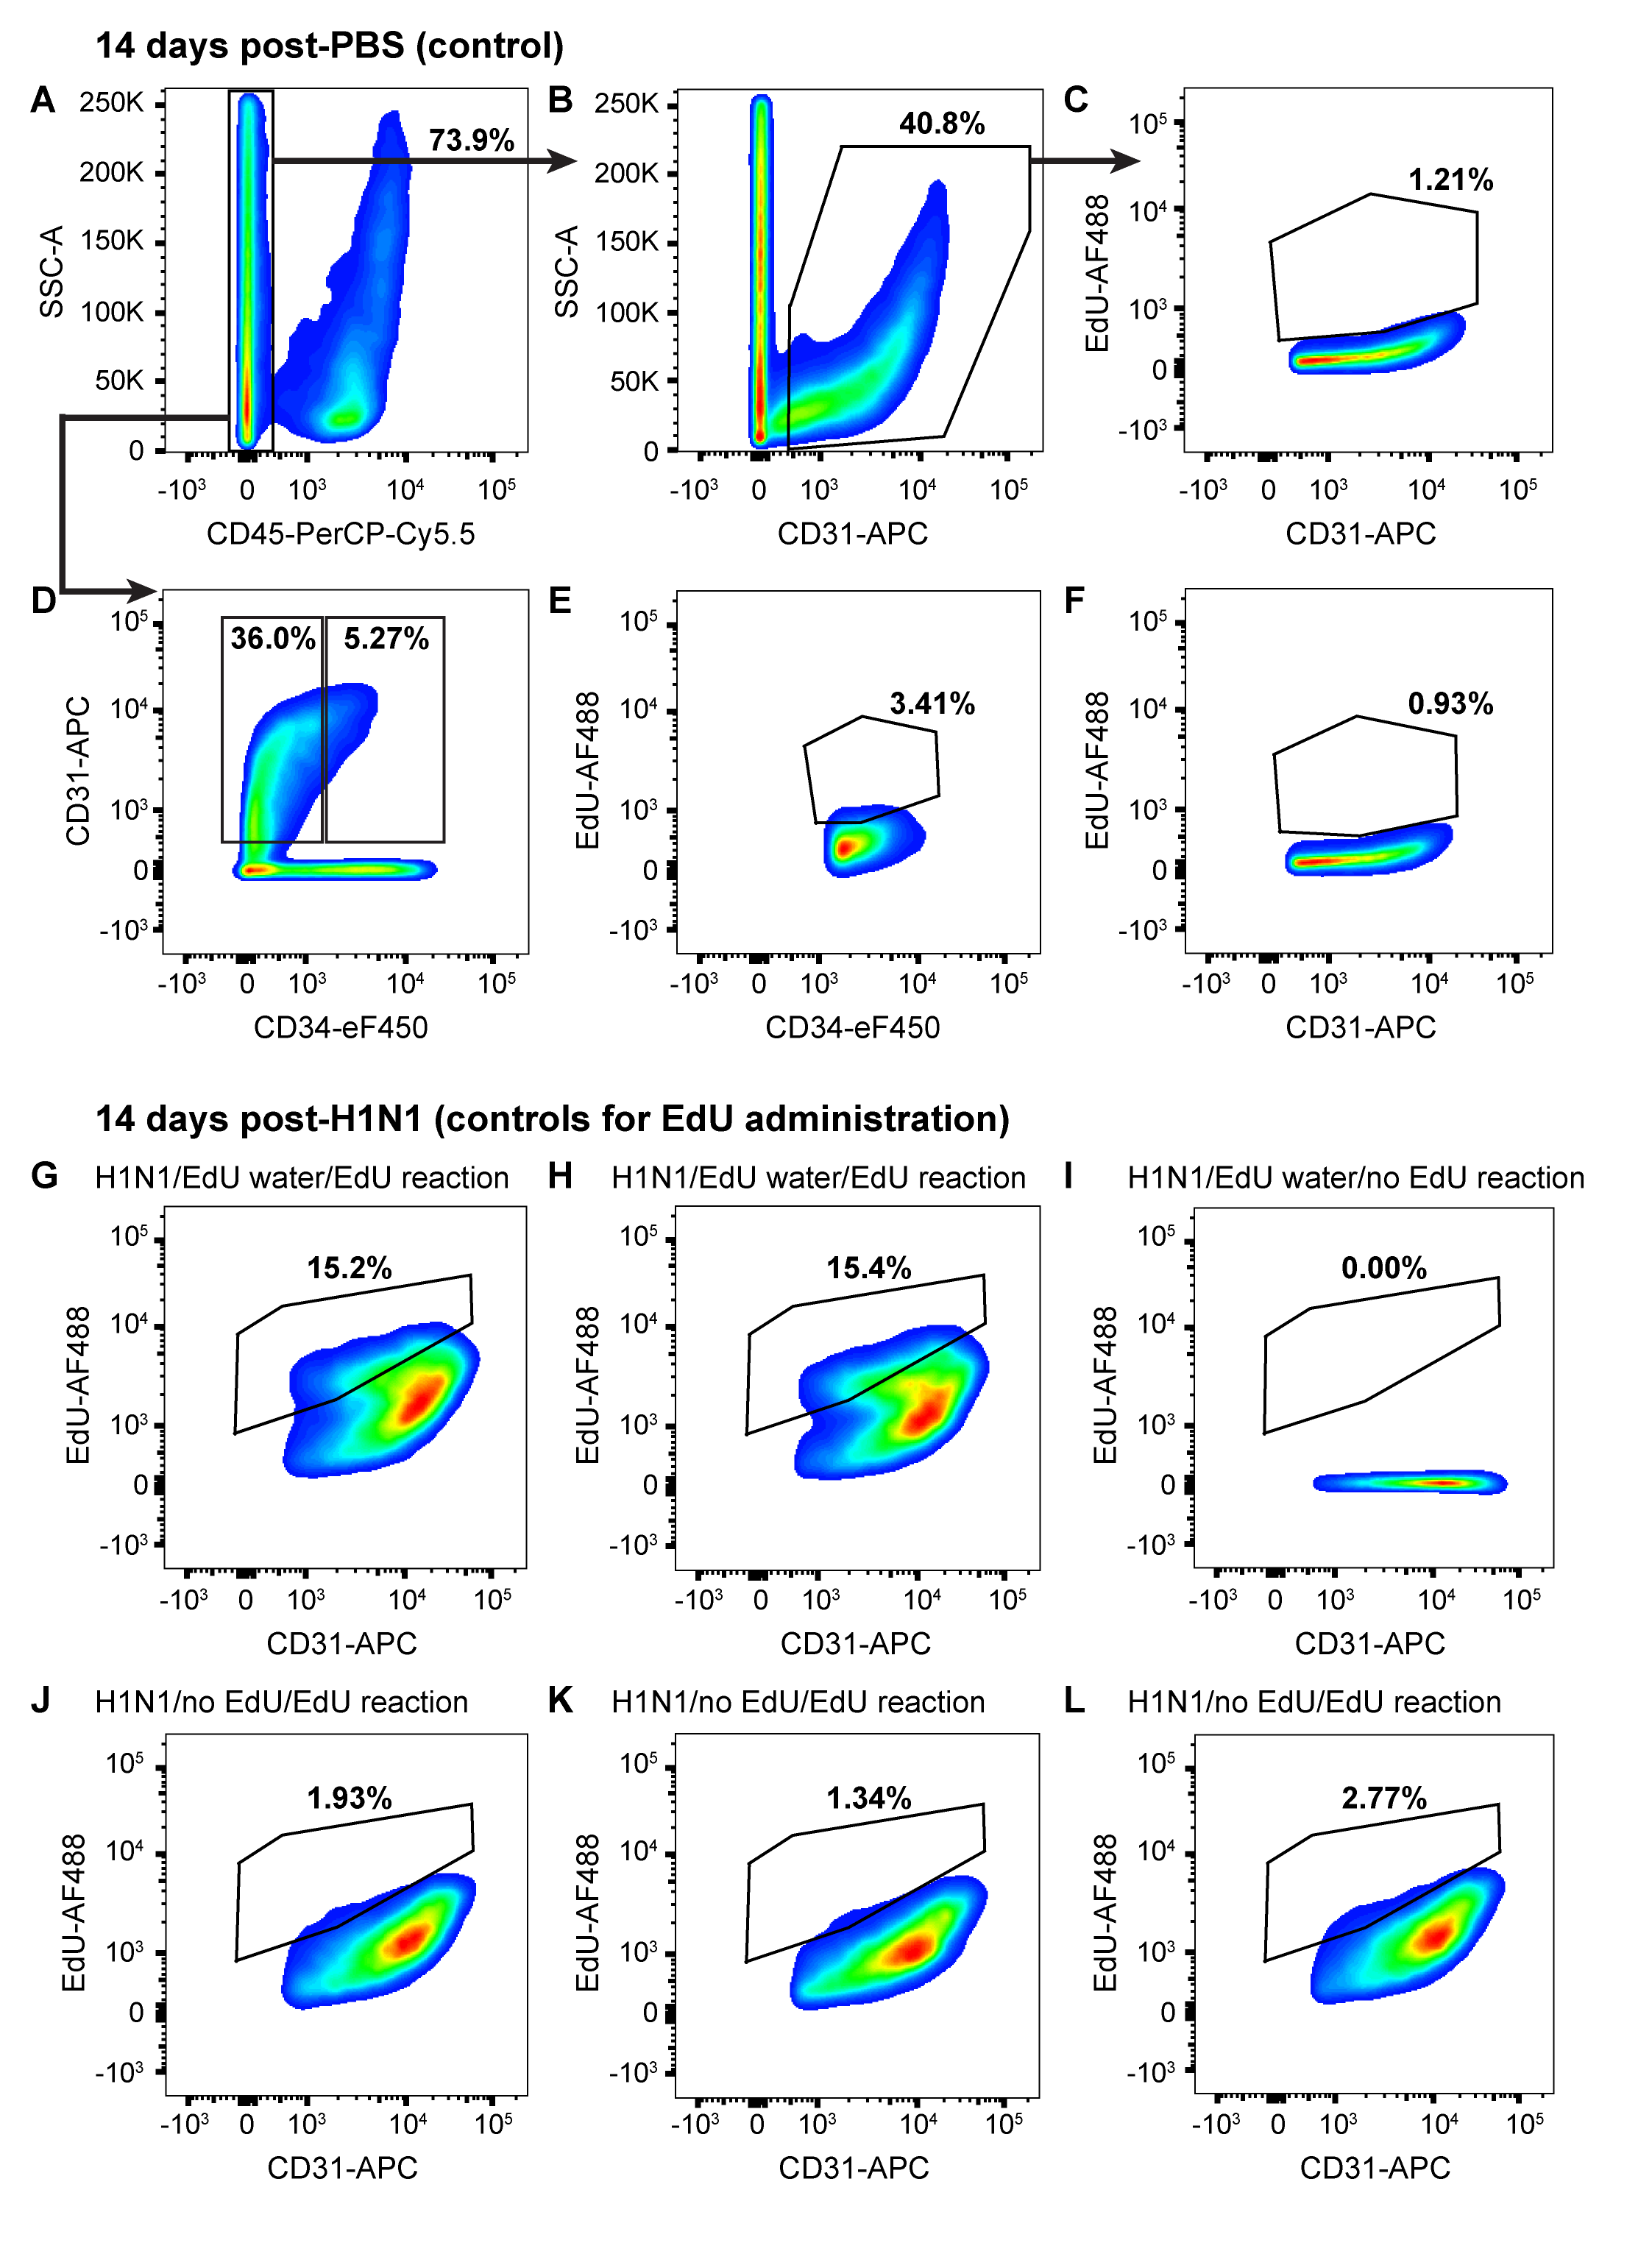

Supplement: supp [file elife-53072-supp-v1.zip › elife_poa_e53072_Figure_5_figure_supplement_2.tif]

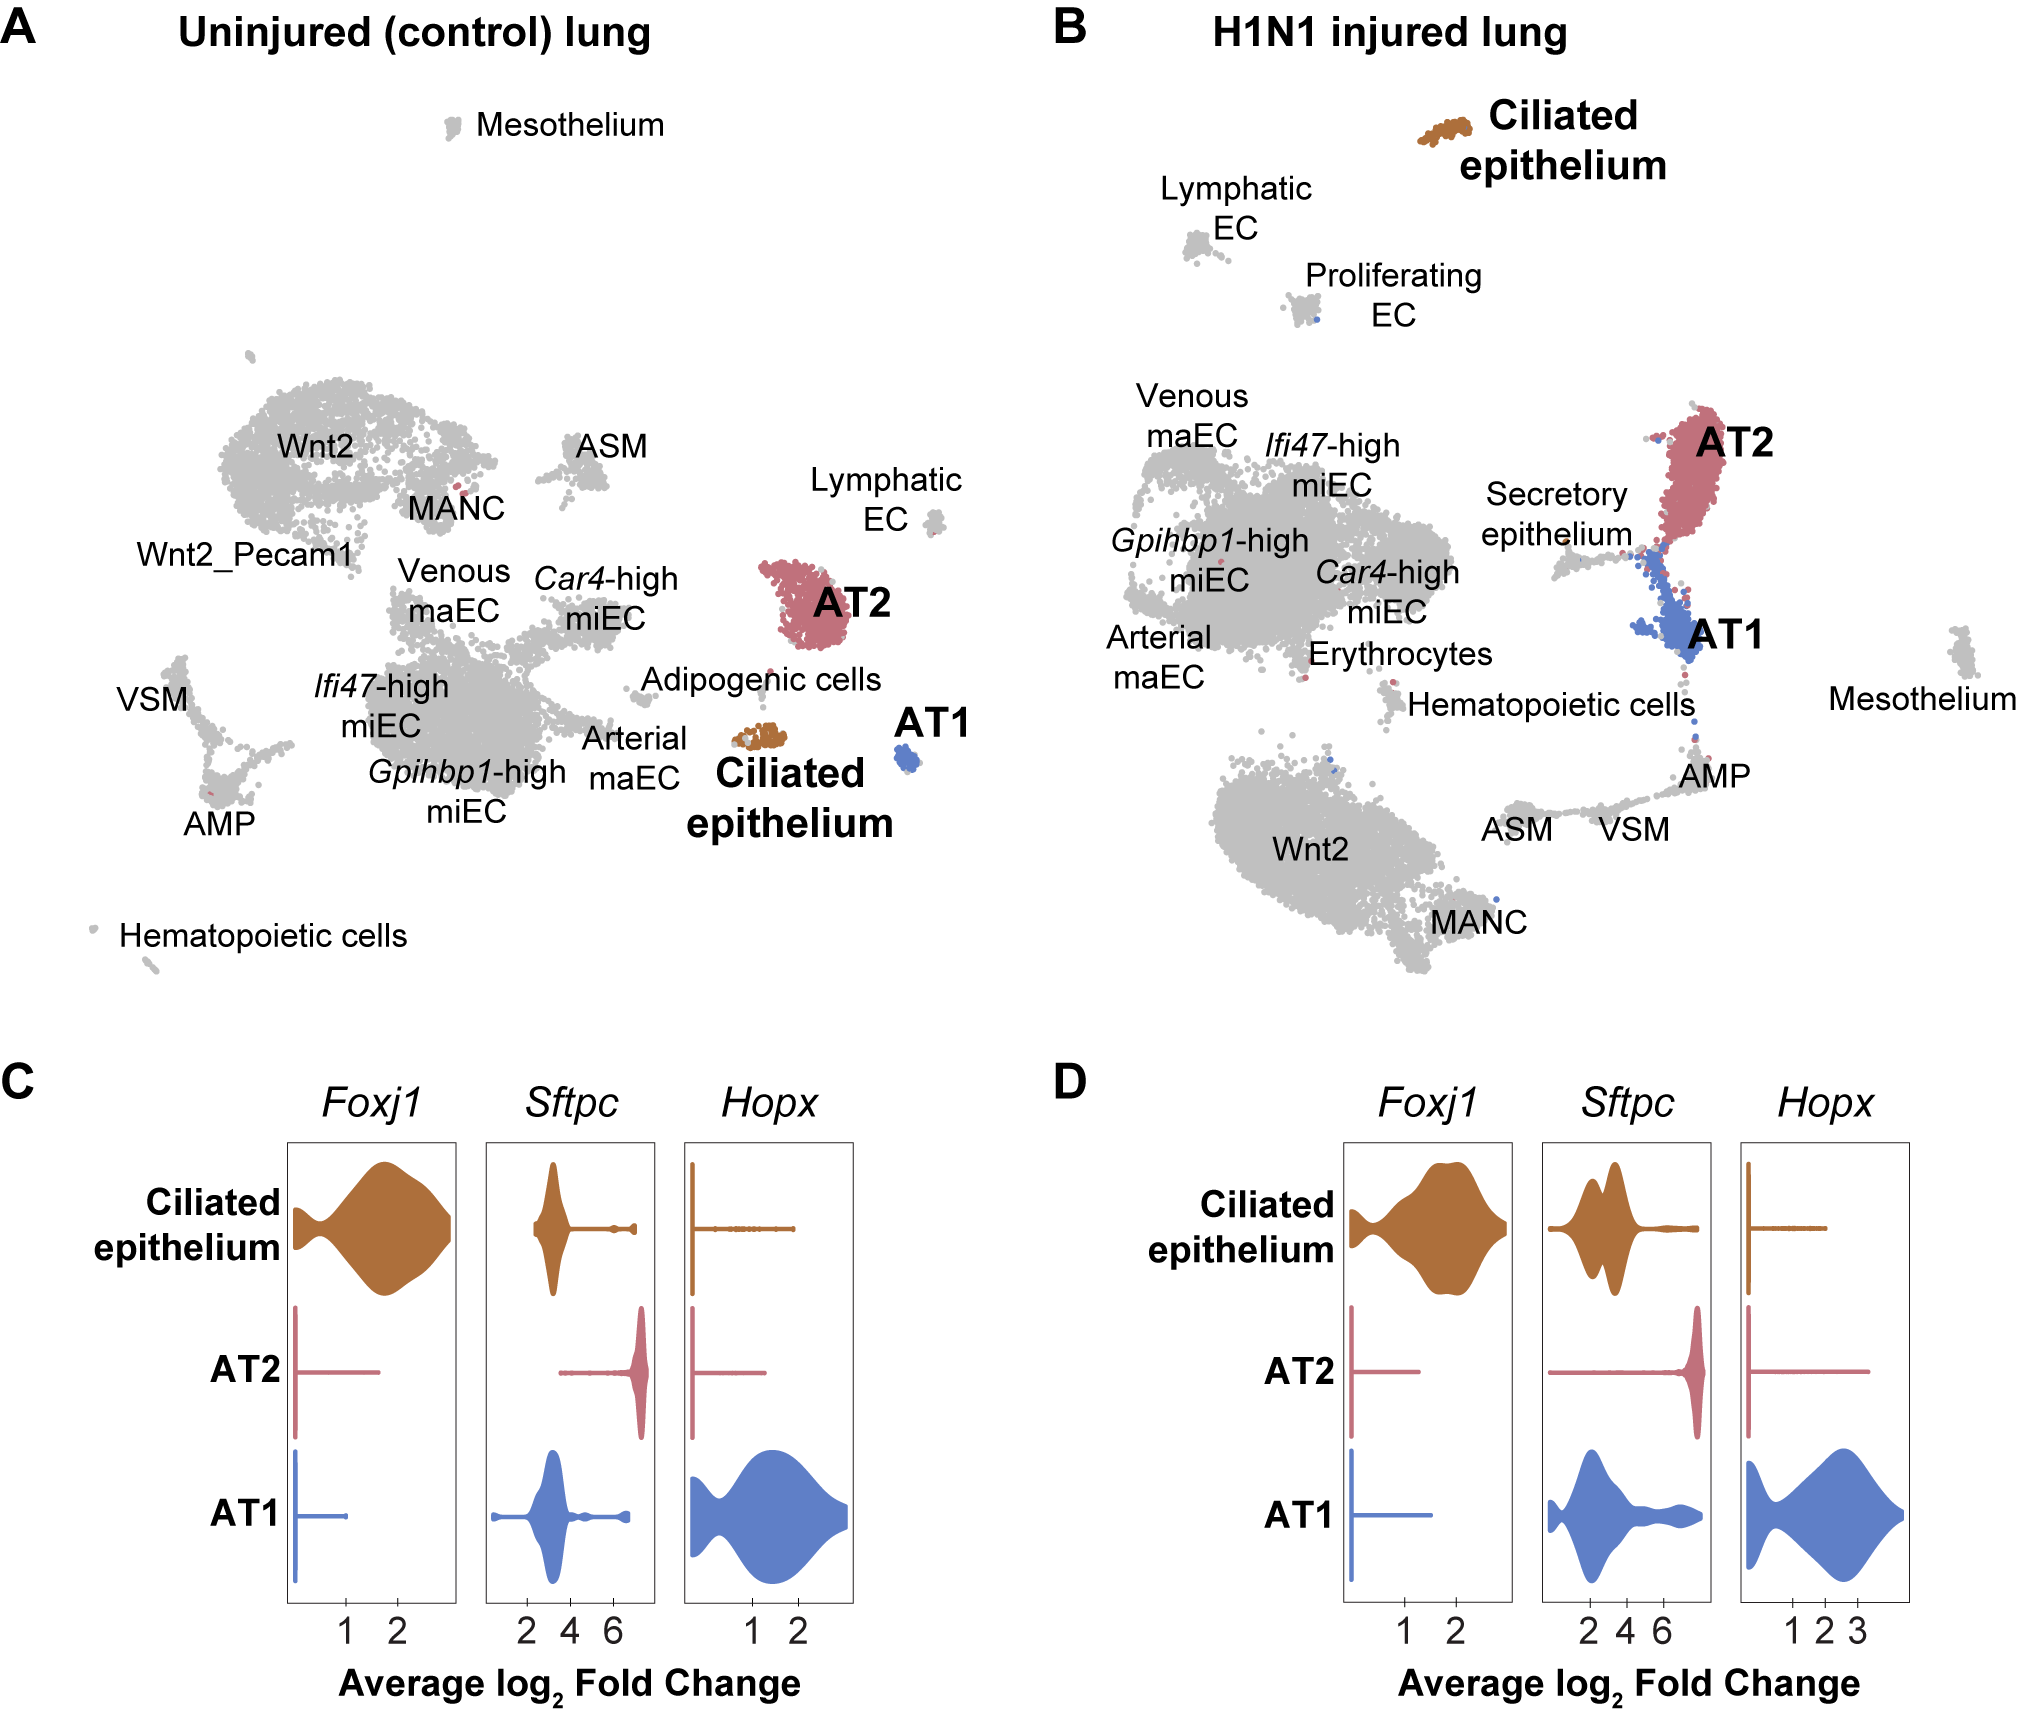

Supplement: supp [file elife-53072-supp-v1.zip › elife_poa_e53072_Figure_4_figure_supplement_1.tif]
